# Supplementary material for: Progesterone, Myo-Inositol, Dopamine and Prolactin Present in Follicular Fluid Have Differential Effects on Sperm Motility Subpopulations
Source: MDPI journal article supplement (doi:10.3390/life11111250), 2021-11-17
Supplement: s1 [file s1]

*Article*

# **Progesterone, Myo-Inositol, Dopamine and Prolactin Present in Follicular Fluid Have Differential Effects on Sperm Motility Subpopulations**

Shannen Keyser, Gerhard van der Horst and Liana Maree \*

Supplementary Material:

**Supplementary Table S1.** Comparison of mean SCA motility and kinematic parameters at 5 and 30 minutes for both the low motile (LM) and high motile (HM) sperm subpopulations after treatment with HTF, CAP, HD-C, 1.98  $\mu$ M progesterone, 3.96  $\mu$ M progesterone, 19.8  $\mu$ M progesterone and 11 mM myo-inositol (mean  $\pm$  SD) (n = 20).

| HTF        |      |                             |        |           | CAP                         |        |           | HD-C                        |       |           | 1.98 μM PRG                  |       |           | 3.96 μM PRG                 |        |           | 19.8 μM PRG                 |        |           | 11 mM MYO                   |        |       | ANOVA |
|------------|------|-----------------------------|--------|-----------|-----------------------------|--------|-----------|-----------------------------|-------|-----------|------------------------------|-------|-----------|-----------------------------|--------|-----------|-----------------------------|--------|-----------|-----------------------------|--------|-------|-------|
| Mean ± SD  | SP p | TP p                        |        | Mean ± SD | SP p                        | TP p   | Mean ± SD | SP p                        | TP p  | Mean ± SD | SP p                         | TP p  | Mean ± SD | SP p                        | TP p   | Mean ± SD | SP p                        | TP p   | Mean ± SD | SP p                        | TP p   |       |       |
| Motile (%) |      |                             |        |           |                             |        |           |                             |       |           |                              |       |           |                             |        |           |                             |        |           |                             |        |       |       |
| 5 min      | HM   | 66.9 ± 21.8***              | <0.001 | 0.552     | 67.7 ± 20.0**               | 0.009  | 0.484     | 66.1 ± 20.2**               | 0.001 | 0.835     | 67.1 ± 19.0**                | 0.005 | 0.633     | 70.7 ± 19.2***              | <0.001 | 0.734     | 69.9 ± 19.9***              | <0.001 | 0.673     | 74.8 ± 15.8***              | <0.001 | 0.233 | 0.784 |
|            | LM   | 32.5 ± 24.2***              |        | 0.462     | 48.6 ± 23.1**               |        | 0.629     | 41.9 ± 19.3**               |       | 0.871     | 47.0 ± 25.5**                |       | 0.950     | 45.1 ± 24.7***              |        | 0.542     | 44.1 ± 25.6***              |        | 0.799     | 45.6 ± 23.8***              |        | 0.897 | 0.558 |
|            | HM   | 62.4 ± 19.9***              | <0.001 |           | 71.8 ± 19.2***              | <0.001 |           | 64.6 ± 21.0**               | 0.002 |           | 64.0 ± 23.0*                 | 0.018 |           | 70.6 ± 23.1**               | 0.006  |           | 68.4 ± 18.9**               | 0.002  |           | 67.1 ± 21.1**               | 0.005  |       | 0.768 |
|            | LM   | 26.8 ± 18.5***              |        |           | 44.9 ± 27.0***              |        |           | 40.8 ± 20.7**               |       |           | 46.5 ± 24.5*                 |       |           | 49.8 ± 25.6**               |        |           | 45.5 ± 26.3**               |        |           | 45.9 ± 25.6**               |        |       | 0.139 |
| Prog (%)   |      |                             |        |           |                             |        |           |                             |       |           |                              |       |           |                             |        |           |                             |        |           |                             |        |       |       |
| 5 min      | HM   | 48.8 ± 22.1**               | 0.001  | 0.585     | 56.8 ± 21.4**               | 0.001  | 0.414     | 54.2 ± 21.2**               | 0.005 | 0.564     | 55.8 ± 22.0*                 | 0.014 | 0.734     | 60.1 ± 22.2***              | <0.001 | 0.964     | 57.8 ± 21.3**               | 0.001  | 0.669     | 63.3 ± 19.9***              | <0.001 | 0.146 | 0.524 |
|            | LM   | 21.1 ± 21.9**               |        | 0.235     | 34.5 ± 22.3**               |        | 0.987     | 32.8 ± 19.8**               |       | 0.490     | 35.6 ± 26.5*                 |       | 0.843     | 35.1 ± 23.0***              |        | 0.734     | 32.5 ± 24.4**               |        | 0.669     | 34.2 ± 22.5***              |        | 0.769 | 0.600 |
|            | HM   | 44.7 ± 20.5***              | <0.001 |           | 61.1 ± 21.4***              | <0.001 |           | 50.0 ± 21.2**               | 0.006 |           | 53.3 ± 25.0*                 | 0.020 |           | 59.8 ± 25.4**               | 0.005  |           | 55.2 ± 19.7**               | 0.003  |           | 53.8 ± 22.4*                | 0.024  |       | 0.332 |
|            | LM   | 12.4 ± 11.4*** <sup>a</sup> |        |           | 34.4 ± 25.2*** <sup>b</sup> |        |           | 28.1 ± 20.2** <sup>b</sup>  |       |           | 34.9 ± 26.1** <sup>b</sup>   |       |           | 37.5 ± 25.3*** <sup>b</sup> |        |           | 33.6 ± 25.6*** <sup>b</sup> |        |           | 36.2 ± 25.6** <sup>b</sup>  |        |       | 0.040 |
| RP (%)     |      |                             |        |           |                             |        |           |                             |       |           |                              |       |           |                             |        |           |                             |        |           |                             |        |       |       |
| 5 min      | HM   | 20.2 ± 4 <sup>ab</sup>      | 0.001  | 0.869     | 28.2 ± 4 <sup>ac</sup>      | 0.004  | 0.396     | 17.9 ± 9.7** <sup>b</sup>   | 0.026 | 0.564     | 25.9 ± 14.3** <sup>abc</sup> | 0.036 | 0.285     | 30.5 ± 4 <sup>c</sup>       | <0.001 | 0.838     | 27.6 ± 4 <sup>c</sup>       | 0.001  | 0.787     | 31.2 ± 16.5*** <sup>c</sup> | 0.004  | 0.771 | 0.039 |
|            | LM   | 8.0 ± 10.7**                |        | 0.452     | 15.2 ± 12.4**               |        | 0.742     | 11.6 ± 10.0*                |       | 0.741     | 17.4 ± 16.5*                 |       | 0.921     | 15.4 ± 12.4***              |        | 0.578     | 13.7 ± 13.2**               |        | 0.787     | 17.8 ± 13.4**               |        | 0.647 | 0.293 |
|            | HM   | 20.8 ± 10.8***              | <0.001 |           | 32.2 ± 15.7**               | 0.007  |           | 19.5 ± 9.8*                 | 0.014 |           | 31.2 ± 17.3**                | 0.007 |           | 31.4 ± 17.1**               | 0.008  |           | 28.8 ± 15.8*                | 0.019  |           | 29.7 ± 18.4                 | 0.099  |       | 0.293 |
|            | LM   | 4.7 ± 5.3*** <sup>a</sup>   |        |           | 18.2 ± 15.8** <sup>b</sup>  |        |           | 12.2 ± 12.6** <sup>ab</sup> |       |           | 17.0 ± 13.6** <sup>b</sup>   |       |           | 18.2 ± 14.3** <sup>b</sup>  |        |           | 17.5 ± 14.8** <sup>b</sup>  |        |           | 20.6 ± 18.2 <sup>b</sup>    |        |       | 0.027 |
| MP (%)     |      |                             |        |           |                             |        |           |                             |       |           |                              |       |           |                             |        |           |                             |        |           |                             |        |       |       |
| 5 min      | HM   | 28.7 ± 14.0**               | 0.002  | 0.286     | 28.2 ± 15.8                 | 0.081  | 0.482     | 36.3 ± 15.2**               | 0.003 | 0.305     | 29.9 ± 14.6*                 | 0.012 | 0.059     | 29.7 ± 14.2*                | 0.015  | 0.753     | 30.4 ± 12.1**               | 0.005  | 0.266     | 32.1 ± 14.3*** <sup>a</sup> | <0.001 | 0.042 | 0.675 |
|            | LM   | 13.1 ± 12.7**               |        | 0.154     | 19.4 ± 11.9                 |        | 0.352     | 21.3 ± 12.2**               |       | 0.170     | 18.6 ± 13.9*                 |       | 0.854     | 19.7 ± 12.6*                |        | 0.927     | 18.8 ± 13.1**               |        | 0.266     | 16.4 ± 12.0***              |        | 0.972 | 0.618 |
|            | HM   | 23.8 ± 11.0***              | <0.001 |           | 28.9 ± 12.8***              | <0.001 |           | 30.5 ± 16.4**               | 0.004 |           | 22.2 ± 11.3                  | 0.259 |           | 28.3 ± 13.9*                | 0.029  |           | 26.4 ± 11.5**               | 0.005  |           | 24.1 ± 10.8***              | 0.009  |       | 0.327 |
|            | LM   | 7.8 ± 6.7***                |        |           | 16.2 ± 10.4***              |        |           | 15.9 ± 10.2**               |       |           | 17.9 ± 13.6                  |       |           | 19.3 ± 12.8*                |        |           | 16.0 ± 11.8**               |        |           | 15.5 ± 9.7**                |        |       | 0.098 |
| NP (%)     |      |                             |        |           |                             |        |           |                             |       |           |                              |       |           |                             |        |           |                             |        |           |                             |        |       |       |
| 5 min      | HM   | 18.0 ± 11.6                 | 0.054  | 0.880     | 10.9 ± 5.2                  | 0.132  | 0.666     | 11.9 ± 6.2                  | 0.152 | 0.313     | 11.4 ± 6.3                   | 0.549 | 0.708     | 10.6 ± 5.0                  | 0.462  | 0.901     | 12.1 ± 8.6                  | 0.888  | 0.46      | 11.5 ± 7.2                  | 0.652  | 0.820 | 0.040 |
|            | LM   | 11.4 ± 5.6                  |        | 0.339     | 14.0 ± 7.0                  |        | 0.242     | 9.0 ± 5.0                   |       | 0.262     | 11.3 ± 8.1                   |       | 0.684     | 10.1 ± 6.7                  |        | 0.296     | 11.6 ± 8.0                  |        | 0.651     | 11.4 ± 4.5                  |        | 0.292 | 0.354 |
|            | HM   | 17.7 ± 11.6                 | 0.327  |           | 10.7 ± 6.8                  | 0.511  |           | 14.6 ± 8.2                  | 0.325 |           | 10.7 ± 5.0                   | 0.633 |           | 10.8 ± 5.4                  | 0.466  |           | 13.2 ± 7.8                  | 0.606  |           | 13.2 ± 11.0                 | 0.319  |       | 0.096 |
|            | LM   | 14.3 ± 10.4                 |        |           | 11.7 ± 6.3                  |        |           | 12.7 ± 8.6                  |       |           | 11.6 ± 7.2                   |       |           | 12.2 ± 7.4                  |        |           | 12.2 ± 7.6                  |        |           | 9.7 ± 5.8                   |        |       | 0.716 |
| Rapid (%)  |      |                             |        |           |                             |        |           |                             |       |           |                              |       |           |                             |        |           |                             |        |           |                             |        |       |       |
| 5 min      | HM   | 37.2 ± 20.9**               | 0.005  | 0.977     | 48.6 ± 20.5*                | 0.002  | 0.123     | 50.0 ± 21.5**               | 0.009 | 0.614     | 50.0 ± 20.6*                 | 0.013 | 0.827     | 54.3 ± 23.7***              | <0.001 | 0.867     | 51.7 ± 23.0**               | 0.001  | 0.714     | 57.1 ± 19.7***              | <0.001 | 0.188 | 0.164 |
|            | LM   | 17.0 ± 20.0**               |        | 0.268     | 28.5 ± 20.6*                |        | 0.991     | 30.6 ± 19.5**               |       | 0.444     | 31.5 ± 25.3*                 |       | 0.734     | 31.0 ± 21.1***              |        | 0.751     | 28.0 ± 23.0**               |        | 0.714     | 29.2 ± 20.2***              |        | 0.680 | 0.524 |
|            | HM   | 36.9 ± 18.7***              | <0.001 |           | 56.0 ± 22.2***              | <0.001 |           | 46.7 ± 21.3**               | 0.006 |           | 47.9 ± 24.0*                 | 0.017 |           | 55.6 ± 26.0***              | 0.004  |           | 49.3 ± 20.0***              | 0.004  |           | 48.9 ± 21.7*                | 0.018  |       | 0.180 |
|            | LM   | 9.2 ± 9.3*** <sup>a</sup>   |        |           | 29.4 ± 23.4*** <sup>b</sup> |        |           | 25.5 ± 19.1** <sup>b</sup>  |       |           | 29.6 ± 24.0* <sup>b</sup>    |       |           | 33.2 ± 23.9*** <sup>b</sup> |        |           | 29.1 ± 23.3*** <sup>b</sup> |        |           | 31.9 ± 23.5* <sup>b</sup>   |        |       | 0.020 |
| Medium (%) |      |                             |        |           |                             |        |           |                             |       |           |                              |       |           |                             |        |           |                             |        |           |                             |        |       |       |
| 5 min      | HM   | 16.6 ± 10.9**               | 0.002  | 0.571     | 11.4 ± 6.3                  | 0.170  | 0.130     | 8.6 ± 4.8*                  | 0.035 | 0.927     | 9.2 ± 4.9                    | 0.112 | 0.938     | 9.1 ± 6.1                   | 0.287  | 0.380     | 10.3 ± 6.8                  | 0.121  | 0.796     | 9.8 ± 4.9                   | 0.191  | 0.503 | 0.095 |
|            | LM   | 7.0 ± 3.9**                 |        | 0.649     | 9.2 ± 4.4                   |        | 0.463     | 5.5 ± 3.0*                  |       | 0.427     | 7.0 ± 4.1                    |       | 0.784     | 7.3 ± 4.2                   |        | 0.667     | 7.5 ± 6.0                   |        | 0.983     | 8.2 ± 5.8                   |        | 0.897 | 0.336 |
|            | HM   | 13.5 ± 8.4*                 | 0.028  |           | 8.8 ± 5.1                   | 0.702  |           | 8.4 ± 4.7                   | 0.262 |           | 9.1 ± 4.6                    | 0.340 |           | 7.2 ± 3.3                   | 0.573  |           | 10.2 ± 6.3                  | 0.146  |           | 9.8 ± 5.3                   | 0.544  |       | 0.073 |
|            | LM   | 6.6 ± 5.3*                  |        |           | 8.2 ± 4.5                   |        |           | 6.6 ± 4.6                   |       |           | 8.3 ± 6.9                    |       |           | 7.8 ± 4.3                   |        |           | 7.9 ± 5.9                   |        |           | 7.6 ± 4.8                   |        |       | 0.915 |
| Slow (%)   |      |                             |        |           |                             |        |           |                             |       |           |                              |       |           |                             |        |           |                             |        |           |                             |        |       |       |
| 5 min      | HM   | 13.1 ± 8.1                  | 0.220  | 0.734     | 7.7 ± 3.9*                  | 0.034  | 0.610     | 7.5 ± 4.3                   | 0.235 | 0.387     | 7.9 ± 4.7                    | 0.698 | 0.716     | 7.3 ± 4.0                   | 0.429  | 0.637     | 7.9 ± 6.3                   | 0.656  | 0.716     | 8.0 ± 4.9                   | 0.489  | 0.955 | 0.196 |
|            | LM   | 8.5 ± 4.7                   |        | 0.359     | 10.9 ± 5.5*                 |        | 0.115     | 5.8 ± 4.0                   |       | 0.141     | 8.5 ± 6.7                    |       | 0.852     | 6.8 ± 5.2                   |        | 0.163     | 8.6 ± 7.0                   |        | 0.640     | 8.2 ± 4.0                   |        | 0.174 | 0.118 |
|            | HM   | 12.0 ± 8.3                  | 0.497  |           | 7.0 ± 4.4                   | 0.278  |           | 9.5 ± 5.1                   | 0.325 |           | 7.0 ± 3.8                    | 0.496 |           | 9.3 ± 8.9                   | 0.829  |           | 8.9 ± 6.8                   | 0.981  |           | 8.4 ± 5.1                   | 0.249  |       | 0.251 |
|            | LM   | 10.9 ± 9.1                  |        |           | 8.5 ± 4.4                   |        |           | 8.7 ± 6.8                   |       |           | 8.5 ± 5.9                    |       |           | 8.8 ± 5.6                   |        |           | 9.0 ± 7.8                   |        |           | 6.4 ± 4.7                   |        |       | 0.575 |

Supplementary Table S1. Continued...

| Motile VCL (µm/s) |    |                            |       |       |                            |       |       |                           |       |       |                            |       |       |                            |       |       |                            |       |       |                            |        |       |  |         |  |  |  |
|-------------------|----|----------------------------|-------|-------|----------------------------|-------|-------|---------------------------|-------|-------|----------------------------|-------|-------|----------------------------|-------|-------|----------------------------|-------|-------|----------------------------|--------|-------|--|---------|--|--|--|
| 5 min             | HM | 112.7 ± 24.5 <sup>a</sup>  | 0.066 | 0.692 | 130.0 ± 21.5 <sup>ab</sup> | 0.005 | 0.342 | 139.3 ± 22.6 <sup>b</sup> | 0.157 | 0.238 | 133.4 ± 23.0 <sup>ab</sup> | 0.038 | 0.550 | 140.2 ± 27.9 <sup>ab</sup> | 0.043 | 0.558 | 137.0 ± 25.2 <sup>ab</sup> | 0.015 | 0.318 | 135.8 ± 22.1 <sup>ab</sup> | 0.001  | 0.281 |  | 0.018   |  |  |  |
|                   | LM | 97.9 ± 18.1 <sup>a</sup>   |       | 0.105 | 110.0 ± 21.5 <sup>ab</sup> |       | 0.433 | 127.2 ± 26.3 <sup>b</sup> |       | 0.227 | 116.6 ± 28.3 <sup>ab</sup> |       | 0.980 | 123.0 ± 27.9 <sup>ab</sup> |       | 0.685 | 117.0 ± 27.1 <sup>ab</sup> |       | 0.558 | 113.2 ± 21.1 <sup>a</sup>  |        | 0.734 |  | 0.034   |  |  |  |
| 30 min            | HM | 115.7 ± 22.0 <sup>ab</sup> | 0.001 |       | 136.6 ± 24.7 <sup>ab</sup> | 0.010 |       | 130.6 ± 18.8              | 0.068 |       | 129.2 ± 23.1               | 0.122 |       | 135.3 ± 28.2               | 0.066 |       | 129.5 ± 24.1 <sup>a</sup>  | 0.038 |       | 128.0 ± 21.2               | 0.152  |       |  | 0.185   |  |  |  |
|                   | LM | 88.1 ± 19.4 <sup>ab</sup>  |       |       | 115.9 ± 26.0 <sup>ab</sup> |       |       | 116.9 ± 22.9 <sup>b</sup> |       |       | 116.4 ± 30.5 <sup>b</sup>  |       |       | 119.6 ± 27.4 <sup>b</sup>  |       |       | 112.0 ± 29.7 <sup>ab</sup> |       |       | 116.0 ± 31.1 <sup>b</sup>  |        |       |  | 0.026   |  |  |  |
| Motile VAP (µm/s) |    |                            |       |       |                            |       |       |                           |       |       |                            |       |       |                            |       |       |                            |       |       |                            |        |       |  |         |  |  |  |
| 5 min             | HM | 61.5 ± 13.4 <sup>ab</sup>  | 0.008 | 0.727 | 67.5 ± 13.2 <sup>ab</sup>  | 0.003 | 0.395 | 63.3 ± 8.1                | 0.112 | 0.983 | 62.9 ± 10.5                | 0.162 | 0.437 | 69.5 ± 13.9 <sup>ab</sup>  | 0.002 | 0.690 | 67.8 ± 12.3 <sup>ab</sup>  | 0.002 | 0.473 | 69.4 ± 12.2 <sup>ab</sup>  | <0.001 | 0.735 |  | 0.202   |  |  |  |
|                   | LM | 49.6 ± 9.5 <sup>ab</sup>   |       | 0.208 | 56.1 ± 10.7 <sup>ab</sup>  |       | 0.489 | 58.4 ± 9.5                |       | 0.441 | 57.6 ± 12.9                |       | 0.949 | 57.2 ± 11.8 <sup>ab</sup>  |       | 0.892 | 55.7 ± 11.7 <sup>ab</sup>  |       | 0.824 | 56.8 ± 12.0 <sup>ab</sup>  |        | 0.548 |  | 0.384   |  |  |  |
| 30 min            | HM | 59.9 ± 12.3 <sup>ab</sup>  | 0.002 |       | 70.7 ± 12.5 <sup>ab</sup>  | 0.002 |       | 63.3 ± 7.8                | 0.024 |       | 66.9 ± 13.2 <sup>a</sup>   | 0.031 |       | 67.8 ± 14.4 <sup>a</sup>   | 0.019 |       | 65.0 ± 13.5 <sup>a</sup>   | 0.044 |       | 68.1 ± 12.9                | 0.066  |       |  | 0.201   |  |  |  |
|                   | LM | 46.5 ± 10.6 <sup>ab</sup>  |       |       | 58.1 ± 12.6 <sup>ab</sup>  |       |       | 55.8 ± 10.2               |       |       | 57.9 ± 13.7 <sup>a</sup>   |       |       | 57.7 ± 13.3 <sup>a</sup>   |       |       | 56.5 ± 13.5 <sup>a</sup>   |       |       | 59.5 ± 16.9                |        |       |  | 0.120   |  |  |  |
| Motile VSL (µm/s) |    |                            |       |       |                            |       |       |                           |       |       |                            |       |       |                            |       |       |                            |       |       |                            |        |       |  |         |  |  |  |
| 5 min             | HM | 47.6 ± 13.3                | 0.006 | 0.763 | 53.5 ± 14.8 <sup>ab</sup>  | 0.005 | 0.689 | 44.4 ± 10.7               | 0.183 | 0.834 | 47.6 ± 11.1                | 0.263 | 0.166 | 53.9 ± 13.2 <sup>ab</sup>  | 0.002 | 0.606 | 51.8 ± 11.7 <sup>ab</sup>  | 0.002 | 0.645 | 53.1 ± 12.6 <sup>a</sup>   | 0.014  | 0.945 |  | 0.127   |  |  |  |
|                   | LM | 35.0 ± 9.8                 |       | 0.288 | 42.5 ± 10.2 <sup>ab</sup>  |       | 0.625 | 39.7 ± 9.1                |       | 0.939 | 43.3 ± 13.4                |       | 0.799 | 41.4 ± 12.4 <sup>ab</sup>  |       | 0.671 | 40.3 ± 11.2 <sup>ab</sup>  |       | 0.527 | 43.3 ± 13.5 <sup>a</sup>   |        | 0.504 |  | 0.386   |  |  |  |
| 30 min            | HM | 45.6 ± 10.5 <sup>ab</sup>  | 0.002 |       | 55.2 ± 12.6 <sup>a</sup>   | 0.014 |       | 43.7 ± 6.4                | 0.184 |       | 52.9 ± 13.6 <sup>a</sup>   | 0.010 |       | 51.9 ± 12.9 <sup>a</sup>   | 0.030 |       | 50.1 ± 12.6                | 0.071 |       | 53.4 ± 13.9                | 0.154  |       |  | 0.052   |  |  |  |
|                   | LM | 32.4 ± 11.6 <sup>ab</sup>  |       |       | 44.0 ± 12.8 <sup>a</sup>   |       |       | 39.5 ± 10.9               |       |       | 42.4 ± 12.9 <sup>a</sup>   |       |       | 43.1 ± 13.5 <sup>a</sup>   |       |       | 42.7 ± 13.7                |       |       | 46.5 ± 17.4                |        |       |  | 0.090   |  |  |  |
| Motile STR (%)    |    |                            |       |       |                            |       |       |                           |       |       |                            |       |       |                            |       |       |                            |       |       |                            |        |       |  |         |  |  |  |
| 5 min             | HM | 73.7 ± 10.4 <sup>ab</sup>  | 0.041 | 0.431 | 75.8 ± 9.8 <sup>a</sup>    | 0.166 | 0.746 | 65.9 ± 7.6 <sup>b</sup>   | 0.867 | 0.938 | 71.4 ± 8.4 <sup>a</sup>    | 0.823 | 0.215 | 74.8 ± 7.5 <sup>ab</sup>   | 0.046 | 0.486 | 73.8 ± 7.1 <sup>ab</sup>   | 0.029 | 0.828 | 73.3 ± 8.4 <sup>a</sup>    | 0.767  | 0.756 |  | 0.014   |  |  |  |
|                   | LM | 65.9 ± 9.7 <sup>a</sup>    |       | 0.452 | 72.1 ± 8.3                 |       | 0.609 | 65.5 ± 7.2                |       | 0.842 | 69.6 ± 11.9                |       | 0.668 | 69.2 ± 10.7 <sup>a</sup>   |       | 0.735 | 68.4 ± 8.6 <sup>a</sup>    |       | 0.439 | 71.4 ± 11.4                |        | 0.549 |  | 0.310   |  |  |  |
| 30 min            | HM | 71.0 ± 8.3 <sup>ab</sup>   | 0.041 |       | 75.0 ± 7.3 <sup>a</sup>    | 0.090 |       | 66.1 ± 6.5 <sup>b</sup>   | 0.986 |       | 74.8 ± 8.3 <sup>a</sup>    | 0.051 |       | 73.3 ± 7.1 <sup>a</sup>    | 0.221 |       | 73.4 ± 5.8 <sup>a</sup>    | 0.305 |       | 74.1 ± 7.9 <sup>a</sup>    | 0.771  |       |  | 0.007   |  |  |  |
|                   | LM | 64.3 ± 9.6 <sup>a</sup>    |       |       | 70.8 ± 8.8                 |       |       | 66.1 ± 12.1               |       |       | 69.5 ± 9.4                 |       |       | 70.2 ± 9.4                 |       |       | 70.7 ± 10.6                |       |       | 71.6 ± 12.4                |        |       |  | 0.311   |  |  |  |
| Motile LIN (%)    |    |                            |       |       |                            |       |       |                           |       |       |                            |       |       |                            |       |       |                            |       |       |                            |        |       |  |         |  |  |  |
| 5 min             | HM | 45.0 ± 10.1 <sup>ab</sup>  | 0.015 | 0.103 | 43.3 ± 10.9 <sup>a</sup>   | 0.412 | 0.611 | 32.5 ± 6.4 <sup>b</sup>   | 0.819 | 0.449 | 36.8 ± 7.7 <sup>bc</sup>   | 0.570 | 0.065 | 40.5 ± 8.2 <sup>ac</sup>   | 0.046 | 0.531 | 39.5 ± 6.6 <sup>bc</sup>   | 0.075 | 0.968 | 40.4 ± 8.3 <sup>ac</sup>   | 0.553  | 0.436 |  | < 0.001 |  |  |  |
|                   | LM | 36.6 ± 7.5 <sup>ab</sup>   |       | 0.722 | 40.9 ± 8.5 <sup>a</sup>    |       | 0.467 | 32.0 ± 6.4 <sup>b</sup>   |       | 0.409 | 38.2 ± 7.6 <sup>bc</sup>   |       | 0.697 | 35.4 ± 8.4 <sup>ab</sup>   |       | 0.525 | 36.0 ± 6.2 <sup>bc</sup>   |       | 0.157 | 38.9 ± 9.0 <sup>bc</sup>   |        | 0.784 |  | 0.018   |  |  |  |
| 30 min            | HM | 39.8 ± 6.9 <sup>bc</sup>   | 0.163 |       | 41.8 ± 8.2 <sup>a</sup>    | 0.262 |       | 34.0 ± 4.8 <sup>b</sup>   | 0.973 |       | 41.1 ± 7.0 <sup>a</sup>    | 0.065 |       | 39.4 ± 6.9 <sup>a</sup>    | 0.312 |       | 39.4 ± 4.4 <sup>a</sup>    | 0.710 |       | 42.3 ± 7.7 <sup>a</sup>    | 0.297  |       |  | 0.010   |  |  |  |
|                   | LM | 36.7 ± 6.9                 |       |       | 39.2 ± 6.9                 |       |       | 34.1 ± 8.3                |       |       | 37.4 ± 6.1                 |       |       | 36.9 ± 6.8                 |       |       | 38.8 ± 6.7                 |       |       | 39.6 ± 8.8                 |        |       |  | 0.252   |  |  |  |
| Motile WOB (%)    |    |                            |       |       |                            |       |       |                           |       |       |                            |       |       |                            |       |       |                            |       |       |                            |        |       |  |         |  |  |  |
| 5 min             | HM | 56.8 ± 7.5 <sup>a</sup>    | 0.102 | 0.123 | 54.2 ± 8.4 <sup>bc</sup>   | 0.819 | 0.847 | 47.5 ± 4.3 <sup>b</sup>   | 0.649 | 0.083 | 50.2 ± 4.7 <sup>bc</sup>   | 0.333 | 0.061 | 52.5 ± 6.8 <sup>ac</sup>   | 0.095 | 0.892 | 51.6 ± 4.7 <sup>a</sup>    | 0.437 | 0.970 | 52.7 ± 5.8 <sup>ac</sup>   | 0.633  | 0.244 |  | 0.004   |  |  |  |
|                   | LM | 52.9 ± 5.2 <sup>ab</sup>   |       | 0.527 | 53.7 ± 6.4 <sup>a</sup>    |       | 0.574 | 48.2 ± 4.0 <sup>b</sup>   |       | 0.339 | 51.6 ± 4.6 <sup>bc</sup>   |       | 0.804 | 49.2 ± 6.2 <sup>ab</sup>   |       | 0.395 | 50.6 ± 4.0 <sup>ab</sup>   |       | 0.089 | 51.8 ± 6.3 <sup>ab</sup>   |        | 0.580 |  | 0.022   |  |  |  |
| 30 min            | HM | 53.4 ± 4.2                 | 0.497 |       | 53.7 ± 5.9                 | 0.524 |       | 49.9 ± 3.1                | 0.862 |       | 53.2 ± 4.6                 | 0.650 |       | 52.3 ± 4.7                 | 0.228 |       | 51.6 ± 2.8                 | 0.275 |       | 54.6 ± 5.0                 | 0.211  |       |  | 0.061   |  |  |  |
|                   | LM | 54.7 ± 3.9 <sup>a</sup>    |       |       | 52.7 ± 4.6 <sup>ab</sup>   |       |       | 49.6 ± 4.7 <sup>b</sup>   |       |       | 51.9 ± 4.3 <sup>ab</sup>   |       |       | 50.6 ± 4.4 <sup>ab</sup>   |       |       | 52.8 ± 4.5 <sup>ab</sup>   |       |       | 52.8 ± 4.4 <sup>ab</sup>   |        |       |  | 0.024   |  |  |  |
| Motile ALH (µm)   |    |                            |       |       |                            |       |       |                           |       |       |                            |       |       |                            |       |       |                            |       |       |                            |        |       |  |         |  |  |  |
| 5 min             | HM | 2.9 ± 0.7 <sup>a</sup>     | 0.572 | 0.201 | 3.5 ± 0.7 <sup>b</sup>     | 0.064 | 0.219 | 4.2 ± 0.8 <sup>b</sup>    | 0.444 | 0.253 | 3.9 ± 0.8 <sup>b</sup>     | 0.050 | 0.343 | 4.0 ± 0.9 <sup>b</sup>     | 0.351 | 0.676 | 3.9 ± 0.8 <sup>b</sup>     | 0.116 | 0.450 | 3.8 ± 0.7 <sup>ab</sup>    | 0.013  | 0.217 |  | < 0.001 |  |  |  |
|                   | LM | 2.8 ± 0.4 <sup>a</sup>     |       | 0.213 | 3.1 ± 0.7 <sup>bc</sup>    |       | 0.188 | 4.0 ± 1.0 <sup>b</sup>    |       | 0.189 | 3.4 ± 0.9 <sup>bc</sup>    |       | 0.843 | 3.7 ± 0.9 <sup>bc</sup>    |       | 0.709 | 3.5 ± 0.8 <sup>bc</sup>    |       | 0.510 | 3.2 ± 0.7 <sup>ac</sup>    |        | 0.720 |  | < 0.001 |  |  |  |
| 30 min            | HM | 3.3 ± 0.7 <sup>ab</sup>    | 0.002 |       | 3.8 ± 0.8                  | 0.146 |       | 3.9 ± 0.6                 | 0.145 |       | 3.6 ± 0.6                  | 0.364 |       | 3.9 ± 0.9                  | 0.234 |       | 3.7 ± 0.7                  | 0.111 |       | 3.5 ± 0.6                  | 0.333  |       |  | 0.103   |  |  |  |
|                   | LM | 2.6 ± 0.5 <sup>ab</sup>    |       |       | 17.1 ± 64.7 <sup>b</sup>   |       |       | 3.6 ± 0.7 <sup>b</sup>    |       |       | 3.4 ± 0.9 <sup>b</sup>     |       |       | 3.6 ± 0.8 <sup>b</sup>     |       |       | 3.3 ± 0.9 <sup>b</sup>     |       |       | 3.3 ± 0.9 <sup>b</sup>     |        |       |  | 0.012   |  |  |  |
| Motile BCF (Hz)   |    |                            |       |       |                            |       |       |                           |       |       |                            |       |       |                            |       |       |                            |       |       |                            |        |       |  |         |  |  |  |
| 5 min             | HM | 22.3 ± 2.9 <sup>ab</sup>   | 0.005 | 0.024 | 21.5 ± 3.5 <sup>bc</sup>   | 0.082 | 0.343 | 17.8 ± 2.6 <sup>b</sup>   | 0.848 | 0.616 | 19.3 ± 2.7 <sup>bc</sup>   | 0.668 | 0.877 | 20.2 ± 3.0 <sup>ac</sup>   | 0.032 | 0.234 | 19.5 ± 2.5 <sup>bc</sup>   | 0.023 | 0.517 | 20.2 ± 3.0 <sup>bc</sup>   | 0.775  | 0.935 |  | < 0.001 |  |  |  |
|                   | LM | 19.2 ± 2.9 <sup>a</sup>    |       | 0.082 | 19.8 ± 2.8                 |       | 0.759 | 17.6 ± 2.2                |       | 0.481 | 18.8 ± 3.9                 |       | 0.314 | 18.5 ± 2.5 <sup>a</sup>    |       | 0.572 | 17.8 ± 2.4 <sup>a</sup>    |       | 0.751 | 19.6 ± 3.4                 |        | 0.751 |  | 0.119   |  |  |  |
| 30 min            | HM | 20.0 ± 2.6 <sup>ab</sup>   | 0.012 |       | 20.5 ± 3.2 <sup>a</sup>    | 0.446 |       | 17.4 ± 2.0 <sup>b</sup>   | 0.666 |       | 19.4 ± 3.2 <sup>ab</sup>   | 0.101 |       | 19.2 ± 3.1 <sup>ab</sup>   | 0.205 |       | 19.0 ± 2.7 <sup>ab</sup>   | 0.131 |       | 20.2 ± 3.2 <sup>a</sup>    | 0.741  |       |  | 0.043   |  |  |  |
|                   | LM | 17.7 ± 2.9 <sup>a</sup>    |       |       | 19.1 ± 3.7                 |       |       | 17.0 ± 3.0                |       |       | 17.7 ± 3.6                 |       |       | 18.0 ± 3.0                 |       |       | 17.5 ± 3.8                 |       |       | 19.8 ± 3.6                 |        |       |  | 0.127   |  |  |  |



Supplementary Table S1. Continued...

| NPVCL (μm/s) |       |    |                           |       |       |                           |       |       |                          |       |       |                          |       |       |                          |       |       |                          |       |       |                            |        |       |       |  |  |  |  |  |
|--------------|-------|----|---------------------------|-------|-------|---------------------------|-------|-------|--------------------------|-------|-------|--------------------------|-------|-------|--------------------------|-------|-------|--------------------------|-------|-------|----------------------------|--------|-------|-------|--|--|--|--|--|
| 30 min       | 5 min | HM | 61.5 ±4.0                 | 0.501 | 0.819 | 61.9 ±7.7                 | 0.370 | 0.417 | 64.5 ±4.9                | 0.695 | 0.541 | 62.4 ±6.2                | 0.345 | 0.742 | 62.5 ±6.9                | 0.918 | 0.802 | 64.3 ±8.6                | 0.100 | 0.814 | 63.1 ±5.4                  | 0.345  | 0.650 | 0.728 |  |  |  |  |  |
|              |       | LM | 61.0 ±5.5                 |       | 0.329 | 60.1 ±5.4                 |       | 0.333 | 63.4 ±10.1               |       | 0.393 | 60.3 ±8.1                |       | 0.586 | 62.7 ±6.7                |       | 0.433 | 60.4 ±7.2                |       | 0.769 | 62.1 ±6.9                  |        | 0.397 | 0.677 |  |  |  |  |  |
|              |       | HM | 61.0 ±7.4                 | 0.267 |       | 63.8 ±8.0 <sup>*</sup>    | 0.011 |       | 63.2 ±6.8                | 0.316 |       | 61.7 ±8.5                | 0.911 |       | 62.0 ±7.3                | 0.656 |       | 61.4 ±13.7               | 0.181 |       | 61.1 ±8.1                  | 0.552  |       | 0.939 |  |  |  |  |  |
|              |       | LM | 57.7 ±8.7                 |       |       | 58.7 ±4.3 <sup>*</sup>    |       |       | 61.0 ±5.9                |       |       | 61.4 ±5.2                |       |       | 61.0 ±8.4                |       |       | 61.1 ±7.2                |       |       | 64.2 ±9.5                  |        |       | 0.287 |  |  |  |  |  |
| NPVAP (μm/s) |       |    |                           |       |       |                           |       |       |                          |       |       |                          |       |       |                          |       |       |                          |       |       |                            |        |       |       |  |  |  |  |  |
| 30 min       | 5 min | HM | 33.3 ±3.6                 | 0.615 | 0.144 | 33.6 ±7.6                 | 0.750 | 0.982 | 32.0 ±3.1                | 0.658 | 0.942 | 31.2 ±4.4                | 0.964 | 0.382 | 33.6 ±4.5                | 0.813 | 0.524 | 34.6 ±6.0                | 0.270 | 0.223 | 32.5 ±5.3                  | 0.75   | 0.82  | 0.455 |  |  |  |  |  |
|              |       | LM | 32.5 ±4.8                 |       | 0.944 | 32.9 ±5.9                 |       | 0.334 | 32.8 ±7.1                |       | 0.85  | 31.3 ±6.4                |       | 0.700 | 33.3 ±3.8                |       | 0.856 | 32.1 ±4.6                |       | 0.223 | 31.8 ±4.7                  |        | 0.599 | 0.893 |  |  |  |  |  |
|              |       | HM | 30.8 ±5.5                 | 0.430 |       | 33.6 ±6.7                 | 0.202 |       | 31.9 ±4.2                | 0.801 |       | 32.7 ±6.6                | 0.691 |       | 32.9 ±6.9                | 0.401 |       | 32.4 ±5.5                | 0.623 |       | 32.3 ±7.4                  | 0.812  |       | 0.9   |  |  |  |  |  |
|              |       | LM | 32.3 ±5.3                 |       |       | 31.5 ±3.7                 |       |       | 31.5 ±4.8                |       |       | 32.0 ±5.8                |       |       | 32.9 ±8.1                |       |       | 33.2 ±5.0                |       |       | 32.8 ±7.5                  |        |       | 0.951 |  |  |  |  |  |
| NPVSL (μm/s) |       |    |                           |       |       |                           |       |       |                          |       |       |                          |       |       |                          |       |       |                          |       |       |                            |        |       |       |  |  |  |  |  |
| 30 min       | 5 min | HM | 22.7 ±5.9 <sup>***</sup>  | 0.090 | 0.031 | 23.4 ±8.1                 | 0.741 | 0.340 | 18.0 ±2.8                | 0.640 | 0.744 | 20.0 ±4.8                | 0.857 | 0.653 | 21.7 ±5.9                | 0.841 | 0.238 | 22.4 ±7.2                | 0.159 | 0.224 | 20.6 ±6.7                  | 0.930  | 0.634 | 0.118 |  |  |  |  |  |
|              |       | LM | 19.2 ±5.4                 |       | 0.975 | 22.7 ±7.2                 |       | 0.134 | 18.7 ±5.1                |       | 0.466 | 19.7 ±5.9                |       | 0.236 | 21.3 ±5.8                |       | 0.547 | 19.8 ±4.9                |       | 0.418 | 20.3 ±6.3                  |        | 0.619 | 0.344 |  |  |  |  |  |
|              |       | HM | 18.4 ±4.9 <sup>***</sup>  | 0.704 |       | 21.4 ±6.0                 | 0.364 |       | 17.7 ±2.9                | 0.854 |       | 19.8 ±6.3                | 0.401 |       | 19.7 ±5.0                | 0.859 |       | 20.2 ±4.3                | 0.597 |       | 20.7 ±6.2                  | 0.733  |       | 0.383 |  |  |  |  |  |
|              |       | LM | 19.1 ±5.8                 |       |       | 19.9 ±5.0                 |       |       | 17.4 ±4.7                |       |       | 17.6 ±6.0                |       |       | 20.1 ±7.7                |       |       | 20.9 ±4.6                |       |       | 21.4 ±7.4                  |        |       | 0.251 |  |  |  |  |  |
| NPSTR (%)    |       |    |                           |       |       |                           |       |       |                          |       |       |                          |       |       |                          |       |       |                          |       |       |                            |        |       |       |  |  |  |  |  |
| 30 min       | 5 min | HM | 63.4 ±12.0                | 0.080 | 0.060 | 63.5 ±11.8                | 0.668 | 0.223 | 53.7 ±5.9                | 0.657 | 0.378 | 57.9 ±11.7               | 0.551 | 0.870 | 61.4 ±11.7               | 0.948 | 0.192 | 61.7 ±12.3               | 0.361 | 0.214 | 57.9 ±11.4                 | 0.695  | 0.785 | 0.087 |  |  |  |  |  |
|              |       | LM | 55.5 ±12.4                |       | 0.837 | 63.7 ±10.7                |       | 0.440 | 54.8 ±7.9                |       | 0.287 | 60.2 ±12.8               |       | 0.106 | 61.2 ±13.1               |       | 0.426 | 58.6 ±10.1               |       | 0.606 | 59.3 ±11.7                 |        | 0.901 | 0.209 |  |  |  |  |  |
|              |       | HM | 56.1 ±9.1                 | 0.938 |       | 59.5 ±10.1                | 0.888 |       | 51.9 ±5.8                | 0.893 |       | 57.4 ±10.5               | 0.307 |       | 56.7 ±12.3               | 0.684 |       | 57.9 ±6.6                | 0.375 |       | 58.7 ±8.4                  | 0.740  |       | 0.288 |  |  |  |  |  |
|              |       | LM | 56.4 ±11.2                |       |       | 58.2 ±11.9                |       |       | 51.5 ±9.7                |       |       | 52.7 ±15.0               |       |       | 58.2 ±11.7               |       |       | 60.1 ±8.9                |       |       | 59.7 ±9.8                  |        |       | 0.117 |  |  |  |  |  |
| NPLIN (%)    |       |    |                           |       |       |                           |       |       |                          |       |       |                          |       |       |                          |       |       |                          |       |       |                            |        |       |       |  |  |  |  |  |
| 30 min       | 5 min | HM | 37.8 ±10.7 <sup>***</sup> | 0.127 | 0.021 | 38.4 ±12.8 <sup>*</sup>   | 0.980 | 0.132 | 27.7 ±4.3 <sup>b</sup>   | 0.363 | 0.692 | 31.6 ±9.3 <sup>ab</sup>  | 0.631 | 0.832 | 36.6 ±11.3 <sup>*</sup>  | 0.485 | 0.142 | 35.6 ±11.0 <sup>*</sup>  | 0.413 | 0.236 | 32.7 ±10.8 <sup>b</sup>    | 0.652  | 0.364 | 0.023 |  |  |  |  |  |
|              |       | LM | 32.3 ±8.9                 |       | 0.835 | 38.3 ±12.1                |       | 0.175 | 29.3 ±5.8                |       | 0.615 | 33.0 ±9.7                |       | 0.219 | 34.3 ±10.8               |       | 0.609 | 33.2 ±7.6                |       | 0.442 | 33.1 ±10.2                 |        | 0.993 | 0.163 |  |  |  |  |  |
|              |       | HM | 30.0 ±7.3 <sup>***</sup>  | 0.268 |       | 33.4 ±8.2                 | 0.874 |       | 27.1 ±4.3                | 0.943 |       | 32.2 ±8.5                | 0.316 |       | 32.0 ±9.3                | 0.809 |       | 31.6 ±6.2                | 0.146 |       | 33.4 ±9.3                  | 0.905  |       | 0.224 |  |  |  |  |  |
|              |       | LM | 33.5 ±10.2                |       |       | 33.9 ±9.2                 |       |       | 28.0 ±8.5                |       |       | 29.4 ±9.8                |       |       | 32.7 ±9.8                |       |       | 35.0 ±7.1                |       |       | 33.1 ±9.9                  |        |       | 0.201 |  |  |  |  |  |
| NPWOB (%)    |       |    |                           |       |       |                           |       |       |                          |       |       |                          |       |       |                          |       |       |                          |       |       |                            |        |       |       |  |  |  |  |  |
| 30 min       | 5 min | HM | 53.5 ±7.2                 | 0.803 | 0.182 | 54.8 ±10.8                | 0.863 | 0.429 | 49.5 ±3.7                | 0.264 | 0.868 | 50.6 ±6.2                | 0.667 | 0.255 | 54.1 ±7.9                | 0.691 | 0.626 | 54.4 ±8.0                | 0.564 | 0.107 | 51.0 ±7.2                  | 0.819  | 0.622 | 0.166 |  |  |  |  |  |
|              |       | LM | 54.1 ±6.9                 |       | 0.267 | 55.3 ±9.1                 |       | 0.454 | 51.4 ±5.9                |       | 0.948 | 51.5 ±7.4                |       | 0.700 | 53.2 ±7.3                |       | 0.810 | 53.2 ±5.1                |       | 0.585 | 51.5 ±8.1                  |        | 0.997 | 0.516 |  |  |  |  |  |
|              |       | HM | 50.4 ±5.5 <sup>*</sup>    | 0.007 |       | 52.6 ±6.6                 | 0.888 |       | 49.7 ±4.3                | 0.478 |       | 53.0 ±7.3                | 0.818 |       | 53.0 ±7.3                | 0.742 |       | 50.8 ±6.4                | 0.085 |       | 52.2 ±8.5                  | 0.811  |       | 0.621 |  |  |  |  |  |
|              |       | LM | 57.0 ±7.2 <sup>*</sup>    |       |       | 52.2 ±7.7                 |       |       | 51.2 ±7.4                |       |       | 52.5 ±8.8                |       |       | 53.7 ±7.9                |       |       | 54.2 ±6.3                |       |       | 51.5 ±9.2                  |        |       | 0.376 |  |  |  |  |  |
| MPVCL (μm/s) |       |    |                           |       |       |                           |       |       |                          |       |       |                          |       |       |                          |       |       |                          |       |       |                            |        |       |       |  |  |  |  |  |
| 30 min       | 5 min | HM | 124.7 ±24.8 <sup>*</sup>  | 0.926 | 0.285 | 138.8 ±23.9 <sup>ab</sup> | 0.138 | 0.196 | 156.7 ±22.6 <sup>b</sup> | 0.307 | 0.359 | 149.8 ±23.0 <sup>b</sup> | 0.111 | 0.103 | 155.2 ±31.7 <sup>b</sup> | 0.072 | 0.507 | 151.1 ±26.5 <sup>b</sup> | 0.154 | 0.290 | 148.8 ±20.8 <sup>***</sup> | 0.004  | 0.304 | 0.003 |  |  |  |  |  |
|              |       | LM | 123.9 ±18.0               |       | 0.527 | 127.8 ±25.5               |       | 0.118 | 148.7 ±22.7              |       | 0.121 | 138.0 ±24.6              |       | 0.564 | 139.4 ±26.2              |       | 0.383 | 140.5 ±22.0              |       | 0.33  | 129.7 ±21.3 <sup>***</sup> |        | 0.240 | 0.025 |  |  |  |  |  |
|              |       | HM | 133.7 ±22.0               | 0.063 |       | 149.0 ±28.2               | 0.186 |       | 146.5 ±39.0              | 0.070 |       | 137.8 ±24.0              | 0.542 |       | 149.3 ±28.2              | 0.825 |       | 143.1 ±23.2              | 0.197 |       | 142.1 ±22.3                | 0.593  |       | 0.499 |  |  |  |  |  |
|              |       | LM | 119.8 ±17.9               |       |       | 138.9 ±21.0               |       |       | 139.3 ±25.3              |       |       | 142.5 ±27.1              |       |       | 147.3 ±33.2              |       |       | 133.3 ±26.4              |       |       | 138.1 ±25.3                |        |       | 0.077 |  |  |  |  |  |
| MPVAP (μm/s) |       |    |                           |       |       |                           |       |       |                          |       |       |                          |       |       |                          |       |       |                          |       |       |                            |        |       |       |  |  |  |  |  |
| 30 min       | 5 min | HM | 64.7 ±10.1 <sup>*</sup>   | 0.036 | 0.836 | 67.6 ±9.4 <sup>*</sup>    | 0.034 | 0.581 | 67.8 ±7.5                | 0.174 | 0.554 | 64.1 ±11.9               | 0.335 | 0.466 | 70.5 ±12.5 <sup>**</sup> | 0.003 | 0.629 | 69.5 ±9.7 <sup>**</sup>  | 0.006 | 0.229 | 70.8 ±7.7 <sup>***</sup>   | <0.001 | 0.229 | 0.207 |  |  |  |  |  |
|              |       | LM | 57.9 ±7.4 <sup>*</sup>    |       | 0.520 | 62.0 ±8.0 <sup>*</sup>    |       | 0.279 | 63.4 ±5.3                |       | 0.704 | 62.8 ±6.8                |       | 0.091 | 60.5 ±8.2 <sup>**</sup>  |       | 0.192 | 62.2 ±7.0 <sup>**</sup>  |       | 0.561 | 61.7 ±8.7 <sup>***</sup>   |        | 0.413 | 0.439 |  |  |  |  |  |
|              |       | HM | 65.4 ±7.3 <sup>***</sup>  | 0.003 |       | 69.2 ±10.0                | 0.061 |       | 65.2 ±16.4               | 0.058 |       | 66.7 ±9.1                | 0.917 |       | 68.9 ±9.2                | 0.161 |       | 65.7 ±10.8               | 0.105 |       | 67.7 ±9.2                  | 0.159  |       | 0.798 |  |  |  |  |  |
|              |       | LM | 55.6 ±9.6 <sup>***</sup>  |       |       | 64.3 ±6.4 <sup>ab</sup>   |       |       | 63.3 ±5.8 <sup>b</sup>   |       |       | 67.0 ±9.4 <sup>b</sup>   |       |       | 64.5 ±11.5 <sup>b</sup>  |       |       | 60.7 ±9.0 <sup>b</sup>   |       |       | 63.8 ±8.3 <sup>b</sup>     |        |       | 0.009 |  |  |  |  |  |



Supplementary Table S1. Continued...

| MP VSL (μm/s) |    |                           |       |       |                            |       |       |                            |       |       |                            |       |       |                            |       |       |                           |       |       |                            |       |       |        |  |  |  |  |  |  |
|---------------|----|---------------------------|-------|-------|----------------------------|-------|-------|----------------------------|-------|-------|----------------------------|-------|-------|----------------------------|-------|-------|---------------------------|-------|-------|----------------------------|-------|-------|--------|--|--|--|--|--|--|
| 30 min        | HM | 45.1 ± 9.2 <sup>*</sup>   | 0.045 | 0.575 | 46.4 ± 9.2                 | 0.253 | 0.590 | 40.7 ± 5.9                 | 0.089 | 0.875 | 42.3 ± 6.2 <sup>*</sup>    | 0.882 | 0.045 | 47.2 ± 8.3 <sup>***</sup>  | 0.003 | 0.350 | 46.0 ± 7.4 <sup>***</sup> | 0.007 | 0.107 | 46.1 ± 6.1                 | 0.063 | 0.156 | 0.009  |  |  |  |  |  |  |
|               | LM | 39.0 ± 6.8 <sup>*</sup>   |       | 0.884 | 43.6 ± 7.1                 |       | 0.849 | 37.1 ± 6.1                 |       | 0.142 | 42.0 ± 6.9                 |       | 0.430 | 39.1 ± 9.3 <sup>***</sup>  |       | 0.216 | 40.0 ± 6.7 <sup>***</sup> |       | 0.366 | 40.7 ± 10.8                |       | 0.542 | 0.204  |  |  |  |  |  |  |
|               | HM | 43.6 ± 5.0 <sup>***</sup> | 0.002 |       | 45.0 ± 7.3                 | 0.373 |       | 40.4 ± 4.9                 | 0.921 |       | 46.0 ± 5.8 <sup>*</sup>    | 0.209 |       | 45.0 ± 6.9                 | 0.259 |       | 42.5 ± 6.6                | 0.868 |       | 44.0 ± 5.8                 | 0.441 |       | 0.116  |  |  |  |  |  |  |
|               | LM | 37.8 ± 6.4 <sup>***</sup> |       |       | 43.2 ± 6.4                 |       |       | 40.2 ± 6.2                 |       |       | 43.6 ± 6.8                 |       |       | 42.4 ± 8.3                 |       |       | 42.1 ± 8.7                |       |       | 42.4 ± 7.3                 |       |       | 0.252  |  |  |  |  |  |  |
| MP STR (%)    |    |                           |       |       |                            |       |       |                            |       |       |                            |       |       |                            |       |       |                           |       |       |                            |       |       |        |  |  |  |  |  |  |
| 30 min        | HM | 70.3 ± 12.8 <sup>*</sup>  | 0.542 | 0.490 | 68.8 ± 10.8 <sup>*</sup>   | 0.739 | 0.293 | 59.4 ± 8.3 <sup>ab</sup>   | 0.796 | 0.517 | 63.9 ± 7.4 <sup>ab</sup>   | 0.287 | 0.025 | 67.7 ± 9.2 <sup>ab</sup>   | 0.364 | 0.362 | 66.1 ± 10.3 <sup>ab</sup> | 0.645 | 0.411 | 66.0 ± 7.5 <sup>ab</sup>   | 0.191 | 0.686 | 0.024  |  |  |  |  |  |  |
|               | LM | 67.7 ± 9.8                |       | 0.944 | 69.9 ± 11.0                |       | 0.595 | 59.6 ± 9.3                 |       | 0.270 | 66.9 ± 10.7                |       | 0.724 | 64.8 ± 12.2                |       | 0.665 | 64.8 ± 8.9                |       | 0.263 | 66.6 ± 16.2                |       | 0.330 | 0.193  |  |  |  |  |  |  |
|               | HM | 67.5 ± 9.1                | 0.993 |       | 65.7 ± 9.0                 | 0.294 |       | 60.1 ± 6.4                 | 0.292 |       | 69.1 ± 7.2 <sup>*</sup>    | 0.194 |       | 65.7 ± 9.6                 | 0.307 |       | 62.5 ± 14.0               | 0.074 |       | 65.1 ± 7.2                 | 0.525 |       | 0.084  |  |  |  |  |  |  |
|               | LM | 67.5 ± 7.8                |       |       | 68.4 ± 7.8                 |       |       | 63.9 ± 13.1                |       |       | 65.8 ± 8.8                 |       |       | 66.4 ± 11.5                |       |       | 68.3 ± 11.6               |       |       | 66.8 ± 9.1                 |       |       | 0.839  |  |  |  |  |  |  |
| MP LIN (%)    |    |                           |       |       |                            |       |       |                            |       |       |                            |       |       |                            |       |       |                           |       |       |                            |       |       |        |  |  |  |  |  |  |
| 30 min        | HM | 42.4 ± 13.0 <sup>*</sup>  | 0.103 | 0.187 | 39.0 ± 12.5 <sup>ab</sup>  | 0.761 | 0.112 | 28.6 ± 7.7 <sup>d</sup>    | 0.679 | 0.195 | 31.8 ± 6.5 <sup>ab</sup>   | 0.243 | 0.033 | 34.6 ± 9.3 <sup>bc</sup>   | 0.359 | 0.645 | 34.3 ± 9.1 <sup>bc</sup>  | 0.542 | 0.833 | 35.0 ± 8.0 <sup>bc</sup>   | 0.684 | 0.742 | 0.003  |  |  |  |  |  |  |
|               | LM | 35.7 ± 8.4 <sup>ab</sup>  |       | 0.890 | 40.1 ± 11.7 <sup>a</sup>   |       | 0.291 | 27.7 ± 7.0 <sup>b</sup>    |       | 0.391 | 34.7 ± 9.2 <sup>ab</sup>   |       | 0.964 | 31.9 ± 11.0 <sup>ab</sup>  |       | 0.414 | 32.7 ± 9.5 <sup>ab</sup>  |       | 0.312 | 35.8 ± 12.5 <sup>ab</sup>  |       | 0.783 | 0.008  |  |  |  |  |  |  |
|               | HM | 37.4 ± 8.7                | 0.968 |       | 34.2 ± 10.0                | 0.054 |       | 29.3 ± 4.4                 | 0.756 |       | 37.4 ± 7.8 <sup>*</sup>    | 0.146 |       | 34.2 ± 10.6                | 0.700 |       | 33.6 ± 5.0                | 0.390 |       | 34.7 ± 6.7                 | 0.952 |       | 0.068  |  |  |  |  |  |  |
|               | LM | 35.4 ± 6.9                |       |       | 36.9 ± 7.9                 |       |       | 31.7 ± 10.5                |       |       | 34.5 ± 8.2                 |       |       | 33.3 ± 9.9                 |       |       | 35.7 ± 10.0               |       |       | 34.9 ± 8.7                 |       |       | 0.068  |  |  |  |  |  |  |
| MP WOB (%)    |    |                           |       |       |                            |       |       |                            |       |       |                            |       |       |                            |       |       |                           |       |       |                            |       |       |        |  |  |  |  |  |  |
| 30 min        | HM | 56.1 ± 8.9 <sup>***</sup> | 0.048 | 0.159 | 52.9 ± 9.8 <sup>bc</sup>   | 0.956 | 0.210 | 45.4 ± 5.5 <sup>b</sup>    | 0.770 | 0.183 | 46.8 ± 4.9 <sup>***</sup>  | 0.243 | 0.015 | 48.5 ± 6.6 <sup>bc,d</sup> | 0.157 | 0.904 | 49.4 ± 6.2 <sup>bc</sup>  | 0.258 | 0.945 | 50.3 ± 6.4 <sup>cd</sup>   | 0.904 | 0.555 | 0.003  |  |  |  |  |  |  |
|               | LM | 50.0 ± 7.5 <sup>ab</sup>  |       | 0.862 | 53.0 ± 8.9 <sup>a</sup>    |       | 0.267 | 42.7 ± 11.1 <sup>b</sup>   |       | 0.187 | 48.8 ± 6.4 <sup>ab</sup>   |       | 0.351 | 46.5 ± 8.7 <sup>ab</sup>   |       | 0.382 | 47.3 ± 5.6 <sup>ab</sup>  |       | 0.374 | 50.9 ± 9.0 <sup>a</sup>    |       | 0.612 | 0.005  |  |  |  |  |  |  |
|               | HM | 52.3 ± 5.4                | 0.214 |       | 49.6 ± 7.3                 | 0.691 |       | 47.7 ± 3.9                 | 0.776 |       | 51.7 ± 5.8 <sup>***</sup>  | 0.699 |       | 49.4 ± 7.6                 | 0.388 |       | 49.5 ± 4.8                | 0.859 |       | 50.7 ± 5.4                 | 0.576 |       | 0.304  |  |  |  |  |  |  |
|               | LM | 49.5 ± 6.9                |       |       | 50.4 ± 6.3                 |       |       | 47.1 ± 6.5                 |       |       | 50.5 ± 5.7                 |       |       | 47.3 ± 6.9                 |       |       | 49.1 ± 7.7                |       |       | 49.6 ± 6.6                 |       |       | 0.522  |  |  |  |  |  |  |
| MP ALH (μm)   |    |                           |       |       |                            |       |       |                            |       |       |                            |       |       |                            |       |       |                           |       |       |                            |       |       |        |  |  |  |  |  |  |
| 30 min        | HM | 3.6 ± 0.9 <sup>*</sup>    | 0.728 | 0.281 | 3.9 ± 0.9 <sup>bc</sup>    | 0.322 | 0.114 | 4.8 ± 0.9 <sup>b</sup>     | 0.602 | 0.723 | 4.5 ± 0.8 <sup>bc</sup>    | 0.196 | 0.053 | 4.6 ± 1.1 <sup>bc</sup>    | 0.285 | 0.664 | 4.5 ± 1.0 <sup>bc</sup>   | 0.561 | 0.430 | 4.3 ± 0.8 <sup>bc</sup>    | 0.025 | 0.638 | 0.002  |  |  |  |  |  |  |
|               | LM | 3.7 ± 0.6 <sup>*</sup>    |       | 0.762 | 3.6 ± 0.9 <sup>a</sup>     |       | 0.116 | 4.6 ± 0.9 <sup>b</sup>     |       | 0.567 | 4.2 ± 0.9 <sup>ab</sup>    |       | 0.609 | 4.3 ± 1.0 <sup>ab</sup>    |       | 0.429 | 4.3 ± 0.8 <sup>ab</sup>   |       | 0.289 | 3.7 ± 0.9 <sup>***</sup>   |       | 0.111 | 0.002  |  |  |  |  |  |  |
|               | HM | 3.9 ± 0.8                 | 0.253 |       | 4.4 ± 0.9                  | 0.241 |       | 4.7 ± 0.6                  | 0.404 |       | 4.0 ± 0.8                  | 0.274 |       | 4.5 ± 1.0                  | 0.857 |       | 4.2 ± 0.8                 | 0.387 |       | 4.2 ± 0.7                  | 0.924 |       | 0.110  |  |  |  |  |  |  |
|               | LM | 3.6 ± 0.7                 |       |       | 4.0 ± 0.8                  |       |       | 4.4 ± 1.1                  |       |       | 4.3 ± 0.9                  |       |       | 4.5 ± 1.1                  |       |       | 4.0 ± 0.9                 |       |       | 4.2 ± 0.9                  |       |       | 0.084  |  |  |  |  |  |  |
| MP BCF (Hz)   |    |                           |       |       |                            |       |       |                            |       |       |                            |       |       |                            |       |       |                           |       |       |                            |       |       |        |  |  |  |  |  |  |
| 30 min        | HM | 22.0 ± 3.4 <sup>***</sup> | 0.017 | 0.009 | 20.3 ± 3.7 <sup>bc</sup>   | 0.290 | 0.089 | 17.2 ± 2.8 <sup>b</sup>    | 0.667 | 0.540 | 17.6 ± 2.6 <sup>b</sup>    | 0.97  | 0.243 | 18.8 ± 2.7 <sup>bc</sup>   | 0.234 | 0.127 | 18.3 ± 2.7 <sup>bc</sup>  | 0.116 | 0.664 | 19.3 ± 2.7 <sup>bc</sup>   | 0.487 | 0.132 | <0.001 |  |  |  |  |  |  |
|               | LM | 19.4 ± 2.2 <sup>ab</sup>  |       | 0.312 | 19.1 ± 3.7 <sup>ab</sup>   |       | 0.700 | 16.8 ± 2.3 <sup>a</sup>    |       | 0.843 | 17.6 ± 3.6 <sup>ab</sup>   |       | 0.586 | 18.0 ± 2.2 <sup>ab</sup>   |       | 0.117 | 17.1 ± 2.5 <sup>a</sup>   |       | 0.577 | 20.0 ± 4.0 <sup>ab</sup>   |       | 0.044 | 0.006  |  |  |  |  |  |  |
|               | HM | 19.2 ± 2.3 <sup>***</sup> | 0.442 |       | 18.6 ± 3.5                 | 0.690 |       | 16.4 ± 1.7                 | 0.904 |       | 18.5 ± 2.5                 | 0.08  |       | 17.8 ± 3.4                 | 0.346 |       | 17.9 ± 2.7                | 0.991 |       | 18.1 ± 2.6                 | 0.629 |       | 0.165  |  |  |  |  |  |  |
|               | LM | 18.4 ± 2.8                |       |       | 19.7 ± 8.0                 |       |       | 16.9 ± 4.4                 |       |       | 17.0 ± 3.0                 |       |       | 16.5 ± 3.8                 |       |       | 17.5 ± 2.8                |       |       | 17.6 ± 3.4 <sup>*</sup>    |       |       | 0.292  |  |  |  |  |  |  |
| RP VCL (μm/s) |    |                           |       |       |                            |       |       |                            |       |       |                            |       |       |                            |       |       |                           |       |       |                            |       |       |        |  |  |  |  |  |  |
| 30 min        | HM | 137.2 ± 18.2 <sup>*</sup> | 0.501 | 0.951 | 145.9 ± 16.1 <sup>ab</sup> | 0.601 | 0.315 | 152.2 ± 11.3 <sup>ab</sup> | 0.104 | 0.301 | 148.2 ± 15.6 <sup>ab</sup> | 0.597 | 0.662 | 154.4 ± 18.4 <sup>b</sup>  | 0.401 | 0.665 | 153.0 ± 19.6 <sup>b</sup> | 0.118 | 0.280 | 147.7 ± 14.3 <sup>ab</sup> | 0.514 | 0.801 | 0.041  |  |  |  |  |  |  |
|               | LM | 133.6 ± 13.5              |       | 0.432 | 143.3 ± 17.4               |       | 0.468 | 144.9 ± 14.1               |       | 0.683 | 142.8 ± 18.7               |       | 0.947 | 149.5 ± 20.2               |       | 0.961 | 142.6 ± 23.7              |       | 0.865 | 144.9 ± 15.2               |       | 0.794 | 0.33   |  |  |  |  |  |  |
|               | HM | 137.5 ± 13.3              | 0.226 |       | 150.9 ± 17.1               | 0.495 |       | 148.4 ± 9.1                | 0.304 |       | 150.2 ± 16.0               | 0.163 |       | 152.0 ± 18.0               | 0.595 |       | 146.9 ± 17.7              | 0.554 |       | 146.6 ± 14.1               | 0.501 |       | 0.124  |  |  |  |  |  |  |
|               | LM | 130.2 ± 18.9              |       |       | 147.2 ± 18.5               |       |       | 142.3 ± 21.8               |       |       | 142.4 ± 20.6               |       |       | 149.3 ± 16.1               |       |       | 143.6 ± 17.7              |       |       | 143.7 ± 13.8               |       |       | 0.116  |  |  |  |  |  |  |
| RP VAP (μm/s) |    |                           |       |       |                            |       |       |                            |       |       |                            |       |       |                            |       |       |                           |       |       |                            |       |       |        |  |  |  |  |  |  |
| 30 min        | HM | 79.6 ± 11.7               | 0.105 | 0.837 | 79.8 ± 12.3                | 0.214 | 0.264 | 71.2 ± 17.7                | 0.692 | 0.183 | 77.2 ± 10.9                | 0.530 | 0.296 | 81.3 ± 11.7 <sup>***</sup> | 0.005 | 0.954 | 80.8 ± 10.0 <sup>*</sup>  | 0.027 | 0.701 | 81.3 ± 10.3 <sup>*</sup>   | 0.042 | 0.492 | 0.139  |  |  |  |  |  |  |
|               | LM | 73.5 ± 11.1               |       | 0.861 | 75.4 ± 11.2                |       | 0.419 | 72.7 ± 7.6                 |       | 0.964 | 75.2 ± 9.8                 |       | 0.779 | 72.6 ± 8.1 <sup>***</sup>  |       | 0.047 | 74.4 ± 8.7 <sup>*</sup>   |       | 0.275 | 74.5 ± 11.8 <sup>*</sup>   |       | 0.181 | 0.947  |  |  |  |  |  |  |
|               | HM | 78.8 ± 8.8                | 0.084 |       | 83.7 ± 10.9                | 0.075 |       | 78.1 ± 6.7                 | 0.069 |       | 80.7 ± 10.5 <sup>*</sup>   | 0.035 |       | 81.1 ± 11.4                | 0.344 |       | 79.6 ± 10.9               | 0.334 |       | 83.4 ± 10.3                | 0.118 |       | 0.519  |  |  |  |  |  |  |
|               | LM | 72.9 ± 9.3                |       |       | 78.0 ± 9.8                 |       |       | 72.8 ± 9.2                 |       |       | 74.4 ± 8.8 <sup>*</sup>    |       |       | 78.0 ± 9.6                 |       |       | 76.9 ± 6.3                |       |       | 78.8 ± 7.9                 |       |       | 0.171  |  |  |  |  |  |  |

Supplementary Table S1. Continued...

| RPVSL (μm/s) |    |                              |       |              |                               |              |       |                        |       |       |                               |              |       |                                            |              |              |                              |              |       |                                            |              |              |        |
|--------------|----|------------------------------|-------|--------------|-------------------------------|--------------|-------|------------------------|-------|-------|-------------------------------|--------------|-------|--------------------------------------------|--------------|--------------|------------------------------|--------------|-------|--------------------------------------------|--------------|--------------|--------|
| 30 min       | HM | 71.7 ±11.7                   | 0.166 | 0.920        | 71.9 ±12.5                    | 0.226        | 0.369 | 66.3 ±7.6              | 0.422 | 0.359 | 68.6 ±10.5                    | 0.928        | 0.289 | <b>72.3 ±11.1<sup>ac</sup></b>             | <b>0.004</b> | 0.782        | <b>71.9 ±8.8<sup>a</sup></b> | <b>0.039</b> | 0.617 | 72.7 ±10.2                                 | 0.061        | 0.437        | 0.436  |
|              | LM | 66.4 ±11.1                   |       | 0.895        | 67.6 ±11.5                    |              | 0.329 | 64.2 ±7.6              |       | 0.921 | 68.8 ±8.6                     |              | 0.326 | <b>63.8 ±7.4<sup>ac</sup></b>              |              | 0.036        | <b>66.7 ±7.4<sup>a</sup></b> |              | 0.485 | 66.4 ±12.2                                 |              | 0.150        | 0.643  |
| 5 min        | HM | 71.3 ±9.1                    | 0.108 |              | <b>75.1 ±10.8<sup>a</sup></b> | <b>0.013</b> |       | 68.7 ±7.0              | 0.154 |       | <b>72.0 ±10.4<sup>a</sup></b> | <b>0.049</b> |       | 73.2 ±11.8                                 | 0.242        |              | 70.5 ±10.0                   | 0.371        |       | 75.2 ±10.5                                 | 0.166        |              | 0.383  |
|              | LM | 65.1 ±11.1                   |       |              | <b>69.1 ±9.1<sup>a</sup></b>  |              |       | 64.5 ±9.4              |       |       | <b>66.3 ±8.3<sup>a</sup></b>  |              |       | 69.4 ±9.5                                  |              |              | 68.1 ±6.3                    |              |       | 71.1 ±7.5                                  |              |              | 0.334  |
| RPSTR (%)    |    |                              |       |              |                               |              |       |                        |       |       |                               |              |       |                                            |              |              |                              |              |       |                                            |              |              |        |
| 30 min       | HM | 90.5 ±2.0 <sup>a</sup>       | 0.580 | 0.595        | 89.9 ±2.6 <sup>a</sup>        | 0.318        | 0.836 | 87.4 ±2.2 <sup>b</sup> | 0.480 | 0.378 | 88.5 ±1.9 <sup>bc</sup>       | 0.199        | 0.570 | 88.7 ±2.1 <sup>bc</sup>                    | 0.211        | 0.753        | 88.8 ±1.6 <sup>bc</sup>      | 0.868        | 0.386 | 89.1 ±2.4 <sup>bc</sup>                    | 0.484        | 0.364        | <0.001 |
|              | LM | 89.9 ±3.1                    |       | 0.458        | 89.2 ±2.6                     |              | 0.717 | 86.5 ±7.8              |       | 0.974 | 89.6 ±3.2                     |              | 0.427 | 87.8 ±2.5                                  |              | 0.364        | 88.9 ±3.4                    |              | 0.609 | 88.6 ±3.0                                  |              | 0.089        | 0.112  |
| 5 min        | HM | 90.1 ±2.4                    | 0.340 |              | 89.8 ±2.7                     | 0.270        |       | 87.8 ±1.9              | 0.809 |       | 88.9 ±2.2                     | 0.986        |       | 88.5 ±1.8                                  | 0.993        |              | 89.2 ±1.6                    | 0.221        |       | 89.8 ±2.3                                  | 0.764        |              | 0.024  |
|              | LM | 88.8 ±4.7                    |       |              | 88.9 ±2.5                     |              |       | 88.2 ±3.5              |       |       | 88.9 ±2.5                     |              |       | 88.5 ±2.4                                  |              |              | 88.5 ±2.3                    |              |       | 90.0 ±2.2                                  |              |              | 0.334  |
| RPLIN (%)    |    |                              |       |              |                               |              |       |                        |       |       |                               |              |       |                                            |              |              |                              |              |       |                                            |              |              |        |
| 30 min       | HM | 54.4 ±7.3 <sup>a</sup>       | 0.123 | 0.624        | 50.9 ±8 <sup>ac</sup>         | 0.214        | 0.985 | 44.9 ±5.9 <sup>b</sup> | 0.734 | 0.160 | 47.4 ±5.1 <sup>bc</sup>       | 0.264        | 0.715 | <b>48.3 ±6.4<sup>a</sup> <sup>bc</sup></b> | <b>0.029</b> | 0.975        | 49.1 ±4.7 <sup>bc</sup>      | 0.889        | 0.936 | 50.4 ±6.1 <sup>bc</sup>                    | 0.071        | 0.271        | <0.001 |
|              | LM | 50.5 ±8.0                    |       | 0.965        | 48.0 ±8.0                     |              | 0.743 | 45.6 ±5.9              |       | 0.704 | 49.9 ±8.7                     |              | 0.299 | <b>44.2 ±5.7<sup>a</sup></b>               |              | 0.060        | 48.8 ±9.3                    |              | 0.936 | <b>46.7 ±7.1<sup>a</sup></b>               |              | <b>0.043</b> | 0.112  |
| 5 min        | HM | 53.2 ±6.2 <sup>a</sup>       | 0.604 |              | 50.9 ±6.2 <sup>ab</sup>       | 0.270        |       | 47.3 ±3.9 <sup>b</sup> | 0.138 |       | 48.1 ±6.1 <sup>bc</sup>       | 0.848        |       | 48.3 ±5.1 <sup>bc</sup>                    | 0.776        |              | 49.0 ±3.7 <sup>bc</sup>      | 0.466        |       | 52.4 ±6.2 <sup>bc</sup>                    | 0.369        |              | 0.005  |
|              | LM | 51.5 ±11.6                   |       |              | 48.7 ±6.8                     |              |       | 46.5 ±8.2              |       |       | 47.8 ±4.5                     |              |       | 47.8 ±6.6                                  |              |              | 48.7 ±5.6                    |              |       | <b>50.8 ±5.0<sup>a</sup></b>               |              |              | 0.112  |
| RPWOB (%)    |    |                              |       |              |                               |              |       |                        |       |       |                               |              |       |                                            |              |              |                              |              |       |                                            |              |              |        |
| 30 min       | HM | 59.6 ±7.1 <sup>a</sup>       | 0.123 | 0.689        | 56.2 ±7.5 <sup>ac</sup>       | 0.489        | 0.849 | 51.0 ±5.5 <sup>b</sup> | 0.811 | 0.121 | 53.2 ±4.6 <sup>bc</sup>       | 0.271        | 0.265 | <b>54.0 ±6.0<sup>a</sup> <sup>bc</sup></b> | <b>0.022</b> | 0.869        | 54.3 ±4.1 <sup>bc</sup>      | 0.993        | 0.829 | <b>56.1 ±5.5<sup>a</sup> <sup>ac</sup></b> | <b>0.040</b> | 0.387        | 0.011  |
|              | LM | 55.7 ±7.3                    |       | 0.895        | 54.7 ±5.9                     |              | 0.896 | 51.5 ±5.4              |       | 0.673 | 55.3 ±7.4                     |              | 0.296 | <b>50.0 ±5.4<sup>a</sup></b>               |              | <b>0.029</b> | 54.4 ±8.3                    |              | 0.829 | <b>52.3 ±6.5<sup>a</sup></b>               |              | <b>0.038</b> | 0.054  |
| 5 min        | HM | 58.6 ±5.5 <sup>a</sup>       | 0.661 |              | 56.5 ±5.5 <sup>ac</sup>       | 0.414        |       | 53.7 ±3.4 <sup>b</sup> | 0.098 |       | 54.8 ±4.5 <sup>bc</sup>       | 0.303        |       | 54.3 ±4.7 <sup>bc</sup>                    | 0.890        |              | 54.6 ±3.4 <sup>bc,d</sup>    | 0.512        |       | 57.5 ±5.6 <sup>cd</sup>                    | 0.367        |              | 0.013  |
|              | LM | 57.3 ±10.0                   |       |              | 54.9 ±7.3                     |              |       | 52.4 ±7.1              |       |       | 53.4 ±4.0                     |              |       | <b>54.0 ±6.4<sup>a</sup></b>               |              |              | 54.7 ±5.3                    |              |       | <b>56.1 ±4.3<sup>a</sup></b>               |              |              | 0.127  |
| RPALH (μm)   |    |                              |       |              |                               |              |       |                        |       |       |                               |              |       |                                            |              |              |                              |              |       |                                            |              |              |        |
| 30 min       | HM | 3.3 ±0.6 <sup>a</sup>        | 0.843 | 0.254        | 3.8 ±0.8 <sup>b</sup>         | 0.968        | 0.506 | 4.3 ±0.7 <sup>b</sup>  | 0.274 | 0.658 | 4.1 ±0.7 <sup>b</sup>         | 0.244        | 0.853 | 4.1 ±0.8 <sup>b</sup>                      | 0.594        | 0.735        | 4.1 ±0.8 <sup>b</sup>        | 0.568        | 0.735 | 3.9 ±0.6 <sup>b</sup>                      | 0.666        | 0.988        | <0.001 |
|              | LM | 3.4 ±0.7                     |       | 0.570        | 3.8 ±0.7                      |              | 0.227 | 4.0 ±0.8               |       | 0.497 | 3.8 ±0.9                      |              | 0.593 | 4.3 ±1.0                                   |              | 0.902        | 4.0 ±1.0                     |              | 0.913 | 4.0 ±0.7                                   |              | 0.666        | 0.154  |
| 5 min        | HM | 3.5 ±0.5 <sup>a</sup>        | 0.841 |              | 4.0 ±0.7 <sup>ab</sup>        | 0.703        |       | 4.2 ±0.5 <sup>b</sup>  | 0.942 |       | 4.1 ±0.6 <sup>b</sup>         | 0.298        |       | 4.2 ±0.7 <sup>b</sup>                      | 0.870        |              | 4.1 ±0.6 <sup>b</sup>        | 0.794        |       | 3.9 ±0.7 <sup>bc</sup>                     | 0.967        |              | 0.017  |
|              | LM | 3.4 ±1.0                     |       |              | 4.0 ±0.6                      |              |       | 4.2 ±0.7               |       |       | 3.9 ±0.7                      |              |       | 4.2 ±0.7                                   |              |              | 4.0 ±0.8                     |              |       | 3.9 ±0.7                                   |              |              | 0.059  |
| RPBCF (Hz)   |    |                              |       |              |                               |              |       |                        |       |       |                               |              |       |                                            |              |              |                              |              |       |                                            |              |              |        |
| 30 min       | HM | <b>23.7 ±2.6<sup>a</sup></b> | 0.105 | <b>0.034</b> | 24.1 ±3.0 <sup>bc</sup>       | 0.189        | 0.191 | 20.5 ±3.4 <sup>b</sup> | 0.342 | 0.925 | 22.1 ±2.9 <sup>bc</sup>       | 0.461        | 0.761 | 22.6 ±3.0 <sup>bc</sup>                    | 0.256        | 0.163        | 22.1 ±2.7 <sup>bc</sup>      | 0.774        | 0.332 | 22.6 ±2.8 <sup>bc</sup>                    | 0.138        | 0.871        | <0.001 |
|              | LM | 24.0 ±2.7                    |       | 0.662        | 22.8 ±3.3                     |              | 0.666 | 21.6 ±3.5              |       | 0.061 | 22.8 ±3.7                     |              | 0.209 | 21.5 ±3.0                                  |              | 0.432        | 21.8 ±5.0                    |              | 0.844 | 20.0 ±6.1                                  |              | 0.098        | 0.097  |
| 5 min        | HM | <b>23.7 ±2.7<sup>a</sup></b> | 0.778 |              | 22.8 ±3.4                     | 0.622        |       | 20.4 ±2.8              | 0.407 |       | 21.8 ±3.5                     | 0.700        |       | 20.7 ±4.9                                  | 0.733        |              | 21.4 ±2.2                    | 0.823        |       | 22.8 ±3.3                                  | 0.723        |              | 0.097  |
|              | LM | 23.3 ±5.3                    |       |              | 21.3 ±5.7                     |              |       | 19.6 ±2.7              |       |       | 20.7 ±5.0                     |              |       | 20.8 ±3.4                                  |              |              | 21.6 ±2.0                    |              |       | 23.1 ±3.4                                  |              |              | 0.110  |

ALH, average path velocity; BCF, beat cross frequency; CAP, capacitating-HTF; HD-C, HD capacitation medium; HTF, human tubal fluid; HM, high motile subpopulation; LIN, linearity; LM, low motile subpopulation; MP, medium-progressive; min, minutes; MYO, myo-inositol; NP, non-progressive; PRG, progesterone; Prog, progressive; RP, rapid-progressive; SD, standard deviation; SP *p*, t-test between subpopulations; STR, straightness; TP *p*, t test between time points; VAP, average path velocity; VCL, curvilinear velocity; VSL, straight-line velocity; WOB, wobble. Values labelled in bold with an asterisks in the same column were significantly different between the HM and LM subpopulations for individual media and SCA parameters (\**p* < 0.05, \*\**p* < 0.01 and \*\*\**p* < 0.001). Values labelled in bold and red with an asterisks in the same column were significantly different between the 5 and 30 minutes for individual subpopulations and media (\**p* < 0.05 and \*\**p* < 0.01). Student's t-test was used or the Mann-Whitney test when normal distribution was absent. <sup>a, b, c, d</sup> Values labelled with different superscript letters in the same row were significantly different between the various media for individual subpopulations and SCA parameters. One-way ANOVA was used for parametric distributions or Kruskal-Wallis test for non-parametric distributions.

**Supplementary Table S2.** Comparison of mean SCA motility and kinematic parameters at 5 and 30 minutes for both the low motile (LM) and high motile (HM) sperm subpopulations after treatment with HTF, CAP, 20 nM, 100 nM and 1  $\mu$ M dopamine (mean  $\pm$  SD) (n = 20).

| HTF        |    |                                 |             |             | CAP                              |             |             | 20 nM DOPA                       |             |             | 100 nM DOPA                      |             |             | 1 $\mu$ M DOPA                |             |             | ANOVA   |
|------------|----|---------------------------------|-------------|-------------|----------------------------------|-------------|-------------|----------------------------------|-------------|-------------|----------------------------------|-------------|-------------|-------------------------------|-------------|-------------|---------|
|            |    | Mean $\pm$ SD                   | SP <i>p</i> | TP <i>p</i> | Mean $\pm$ SD                    | SP <i>p</i> | TP <i>p</i> | Mean $\pm$ SD                    | SP <i>p</i> | TP <i>p</i> | Mean $\pm$ SD                    | SP <i>p</i> | TP <i>p</i> | Mean $\pm$ SD                 | SP <i>p</i> | TP <i>p</i> |         |
| Prog (%)   |    |                                 |             |             |                                  |             |             |                                  |             |             |                                  |             |             |                               |             |             |         |
| 5 min      | HM | 44.5 $\pm$ 23.5 <sup>***</sup>  | <0.001      | 0.251       | 51.4 $\pm$ 21.1 <sup>***</sup>   | <0.001      | 0.944       | 57.4 $\pm$ 27.1 <sup>***</sup>   | <0.001      | 0.415       | 54.5 $\pm$ 22.2 <sup>***</sup>   | <0.001      | 0.318       | 57.0 $\pm$ 25.0               | 0.174       | 0.204       | 0.306   |
|            | LM | 18.4 $\pm$ 15.7 <sup>***</sup>  |             | 0.497       | 26.7 $\pm$ 17.3 <sup>***</sup>   |             | 0.190       | 29.2 $\pm$ 17.5 <sup>***</sup>   |             | 0.849       | 28.7 $\pm$ 18.2 <sup>*</sup>     |             | 0.550       | 31.1 $\pm$ 25.5               |             | 0.968       | 0.140   |
| 30 min     | HM | 37.0 $\pm$ 22.5 <sup>***</sup>  | <0.001      |             | 51.0 $\pm$ 25.4 <sup>***</sup>   | <0.001      |             | 51.4 $\pm$ 25.6 <sup>**</sup>    | 0.003       |             | 48.1 $\pm$ 24.7 <sup>***</sup>   | 0.011       |             | 47.4 $\pm$ 27.6               | 0.968       |             | 0.257   |
|            | LM | 14.9 $\pm$ 14.3 <sup>***a</sup> |             |             | 21.7 $\pm$ 20.0 <sup>***ab</sup> |             |             | 30.3 $\pm$ 21.0 <sup>***b</sup>  |             |             | 30.7 $\pm$ 20.0 <sup>***ab</sup> |             |             | 30.5 $\pm$ 22.0 <sup>b</sup>  |             |             | 0.017   |
| Motile (%) |    |                                 |             |             |                                  |             |             |                                  |             |             |                                  |             |             |                               |             |             |         |
| 5 min      | HM | 60.8 $\pm$ 24.0 <sup>***</sup>  | <0.001      | 0.170       | 67.4 $\pm$ 19.6 <sup>***</sup>   | <0.001      | 0.854       | 66.0 $\pm$ 26.2 <sup>***</sup>   | <0.001      | 0.388       | 65.6 $\pm$ 22.5 <sup>***</sup>   | <0.001      | 0.377       | 66.2 $\pm$ 22.3               | 0.273       | 0.222       | 0.875   |
|            | LM | 31.8 $\pm$ 24.5 <sup>***</sup>  |             | 0.646       | 40.9 $\pm$ 21.9 <sup>***</sup>   |             | 0.306       | 39.6 $\pm$ 21.2 <sup>***</sup>   |             | 0.667       | 40.3 $\pm$ 22.3 <sup>***</sup>   |             | 0.781       | 41.4 $\pm$ 26.4               |             | 0.857       | 0.583   |
| 30 min     | HM | 51.3 $\pm$ 24.4 <sup>**</sup>   | 0.001       |             | 64.0 $\pm$ 26.6 <sup>***</sup>   | <0.001      |             | 60.5 $\pm$ 27.2 <sup>*</sup>     | 0.011       |             | 59.0 $\pm$ 25.8 <sup>*</sup>     | 0.015       |             | 57.9 $\pm$ 24.9               | 0.857       |             | 0.521   |
|            | LM | 28.5 $\pm$ 20.5 <sup>**</sup>   |             |             | 34.0 $\pm$ 25.0 <sup>***</sup>   |             |             | 42.4 $\pm$ 23.6 <sup>*</sup>     |             |             | 42.2 $\pm$ 22.6 <sup>*</sup>     |             |             | 40.5 $\pm$ 23.9               |             |             | 0.167   |
| RP (%)     |    |                                 |             |             |                                  |             |             |                                  |             |             |                                  |             |             |                               |             |             |         |
| 5 min      | HM | 18.9 $\pm$ 14.4 <sup>***</sup>  | <0.001      | 0.443       | 25.2 $\pm$ 17.8 <sup>***</sup>   | <0.001      | 0.778       | 27.5 $\pm$ 17.7 <sup>**</sup>    | 0.003       | 0.907       | 28.4 $\pm$ 15.1 <sup>**</sup>    | 0.001       | 0.497       | 30.5 $\pm$ 20.3               | 0.946       | 0.946       | 0.160   |
|            | LM | 6.6 $\pm$ 7.3 <sup>***</sup>    |             | 0.856       | 10.7 $\pm$ 8.9 <sup>***</sup>    |             | 0.248       | 12.8 $\pm$ 8.6 <sup>**</sup>     |             | 0.771       | 13.1 $\pm$ 11.7 <sup>**</sup>    |             | 0.606       | 16.2 $\pm$ 17.5               |             | 0.834       | 0.056   |
| 30 min     | HM | 15.0 $\pm$ 11.2 <sup>***a</sup> | 0.006       |             | 26.5 $\pm$ 17.8 <sup>***b</sup>  | <0.001      |             | 28.7 $\pm$ 17.9 <sup>***b</sup>  | <0.001      |             | 25.4 $\pm$ 16.6 <sup>***b</sup>  | 0.006       |             | 30.2 $\pm$ 19.9 <sup>b</sup>  | 0.834       |             | 0.017   |
|            | LM | 6.3 $\pm$ 7.5 <sup>**</sup>     |             |             | 9.4 $\pm$ 11.9 <sup>***</sup>    |             |             | 13.4 $\pm$ 11.6 <sup>***</sup>   |             |             | 13.9 $\pm$ 9.8 <sup>**</sup>     |             |             | 14.4 $\pm$ 13.9               |             |             | 0.056   |
| MP (%)     |    |                                 |             |             |                                  |             |             |                                  |             |             |                                  |             |             |                               |             |             |         |
| 5 min      | HM | 25.7 $\pm$ 18.7 <sup>**</sup>   | 0.003       | 0.727       | 26.3 $\pm$ 17.7 <sup>*</sup>     | 0.024       | 0.977       | 29.9 $\pm$ 15.9 <sup>**</sup>    | 0.002       | 0.106       | 26.6 $\pm$ 14.7 <sup>**</sup>    | 0.002       | 0.516       | 26.5 $\pm$ 15.6 <sup>**</sup> | 0.004       | 0.060       | 0.908   |
|            | LM | 11.8 $\pm$ 9.4 <sup>**</sup>    |             | 0.194       | 15.9 $\pm$ 11.0 <sup>*</sup>     |             | 0.236       | 16.5 $\pm$ 10.3 <sup>**</sup>    |             | 0.915       | 15.6 $\pm$ 7.9 <sup>**</sup>     |             | 0.910       | 14.9 $\pm$ 11.3 <sup>**</sup> |             | 0.704       | 0.501   |
| 30 min     | HM | 22.0 $\pm$ 13.6 <sup>***</sup>  | <0.001      |             | 24.5 $\pm$ 15.1 <sup>**</sup>    | 0.002       |             | 22.7 $\pm$ 14.8                  | 0.127       |             | 22.7 $\pm$ 12.5                  | 0.114       |             | 19.7 $\pm$ 15.3               | 0.704       |             | 0.836   |
|            | LM | 8.6 $\pm$ 7.8 <sup>***a</sup>   |             |             | 12.3 $\pm$ 10.2 <sup>***ab</sup> |             |             | 16.9 $\pm$ 11.5 <sup>ab</sup>    |             |             | 16.8 $\pm$ 12.2 <sup>ab</sup>    |             |             | 16.1 $\pm$ 11.9 <sup>b</sup>  |             |             | 0.035   |
| NP (%)     |    |                                 |             |             |                                  |             |             |                                  |             |             |                                  |             |             |                               |             |             |         |
| 5 min      | HM | 16.3 $\pm$ 8.3 <sup>a</sup>     | 0.101       | 0.574       | 16.0 $\pm$ 12.2 <sup>ac</sup>    | 0.946       | 0.388       | 8.6 $\pm$ 4.5 <sup>b</sup>       | 0.287       | 0.692       | 11.1 $\pm$ 5.4 <sup>bc</sup>     | 0.758       | 0.503       | 9.2 $\pm$ 7.3 <sup>c</sup>    | 0.290       | 0.290       | < 0.001 |
|            | LM | 13.4 $\pm$ 12.5                 |             | 0.976       | 14.2 $\pm$ 7.9                   |             | 0.286       | 10.4 $\pm$ 7.2                   |             | 0.421       | 11.7 $\pm$ 8.1                   |             | 0.828       | 10.2 $\pm$ 4.5                |             | 0.899       | 0.441   |
| 30 min     | HM | 14.3 $\pm$ 8.4                  | 0.522       |             | 13.0 $\pm$ 9.6                   | 0.854       |             | 9.1 $\pm$ 4.8                    | 0.100       |             | 10.9 $\pm$ 7.5                   | 0.665       |             | 11.5 $\pm$ 8.8                | 0.653       |             | 0.305   |
|            | LM | 13.7 $\pm$ 10.8                 |             |             | 12.3 $\pm$ 9.0                   |             |             | 12.1 $\pm$ 7.6                   |             |             | 11.5 $\pm$ 6.4                   |             |             | 10.0 $\pm$ 6.0                |             |             | 0.920   |
| Rapid (%)  |    |                                 |             |             |                                  |             |             |                                  |             |             |                                  |             |             |                               |             |             |         |
| 5 min      | HM | 29.9 $\pm$ 19.8 <sup>***a</sup> | <0.001      | 0.873       | 40.9 $\pm$ 22.3 <sup>***ab</sup> | <0.001      | 0.557       | 50.0 $\pm$ 27.0 <sup>***b</sup>  | <0.001      | 0.520       | 47.1 $\pm$ 21.0 <sup>***b</sup>  | <0.001      | 0.491       | 49.3 $\pm$ 24.2 <sup>b</sup>  | 0.240       | 0.301       | 0.012   |
|            | LM | 11.6 $\pm$ 10.3 <sup>***a</sup> |             | 0.711       | 19.6 $\pm$ 14.2 <sup>***b</sup>  |             | 0.313       | 22.2 $\pm$ 13.4 <sup>***b</sup>  |             | 0.933       | 22.8 $\pm$ 16.0 <sup>***b</sup>  |             | 0.657       | 27.9 $\pm$ 23.6 <sup>b</sup>  |             | 0.818       | 0.027   |
| 30 min     | HM | 30.8 $\pm$ 20.8 <sup>***</sup>  | <0.001      |             | 45.0 $\pm$ 26.1 <sup>***</sup>   | <0.001      |             | 45.3 $\pm$ 24.7 <sup>***</sup>   | <0.001      |             | 42.9 $\pm$ 23.6 <sup>**</sup>    | 0.007       |             | 41.7 $\pm$ 26.8               | 0.818       |             | 0.211   |
|            | LM | 11.3 $\pm$ 11.9 <sup>***a</sup> |             |             | 16.8 $\pm$ 16.0 <sup>***ac</sup> |             |             | 22.5 $\pm$ 15.4 <sup>***bc</sup> |             |             | 24.8 $\pm$ 17.1 <sup>***bc</sup> |             |             | 29.0 $\pm$ 23.9 <sup>b</sup>  |             |             | 0.005   |
| Medium (%) |    |                                 |             |             |                                  |             |             |                                  |             |             |                                  |             |             |                               |             |             |         |
| 5 min      | HM | 18.1 $\pm$ 14.3 <sup>***a</sup> | 0.007       | 0.009       | 13.4 $\pm$ 9.6 <sup>ab</sup>     | 0.273       | 0.148       | 9.4 $\pm$ 7.9 <sup>b</sup>       | 0.961       | 0.786       | 10.2 $\pm$ 5.2 <sup>ab</sup>     | 0.107       | 0.207       | 9.4 $\pm$ 8.0 <sup>b</sup>    | 0.295       | 0.295       | 0.046   |
|            | LM | 9.2 $\pm$ 7.7 <sup>**</sup>     |             | 0.197       | 10.7 $\pm$ 7.2                   |             | 0.133       | 9.4 $\pm$ 7.4                    |             | 0.522       | 8.0 $\pm$ 6.5                    |             | 0.543       | 5.5 $\pm$ 5.0                 |             | 0.180       | 0.086   |
| 30 min     | HM | 9.6 $\pm$ 7.9 <sup>**</sup>     | 0.165       |             | 9.3 $\pm$ 7.9                    | 0.560       |             | 9.1 $\pm$ 8.0                    | 0.265       |             | 8.7 $\pm$ 6.5                    | 0.812       |             | 7.5 $\pm$ 7.0                 | 0.180       |             | 0.876   |
|            | LM | 6.7 $\pm$ 5.6                   |             |             | 7.7 $\pm$ 6.8                    |             |             | 10.8 $\pm$ 7.7                   |             |             | 8.6 $\pm$ 5.7                    |             |             | 6.9 $\pm$ 4.6                 |             |             | 0.130   |
| Slow (%)   |    |                                 |             |             |                                  |             |             |                                  |             |             |                                  |             |             |                               |             |             |         |
| 5 min      | HM | 12.9 $\pm$ 7.8 <sup>a</sup>     | 0.148       | 0.327       | 13.1 $\pm$ 12.0 <sup>a</sup>     | 0.839       | 0.304       | 6.5 $\pm$ 3.9 <sup>b</sup>       | 0.289       | 0.719       | 7.1 $\pm$ 4.9 <sup>b</sup>       | 0.273       | 0.684       | 7.5 $\pm$ 6.0 <sup>b</sup>    | 0.594       | 0.594       | 0.001   |
|            | LM | 11.0 $\pm$ 11.0                 |             | 0.968       | 10.6 $\pm$ 6.2                   |             | 0.256       | 8.0 $\pm$ 5.8                    |             | 0.528       | 9.5 $\pm$ 7.3                    |             | 0.796       | 8.0 $\pm$ 4.2                 |             | 0.779       | 0.533   |
| 30 min     | HM | 10.9 $\pm$ 6.9                  | 0.689       |             | 9.7 $\pm$ 7.0                    | 0.823       |             | 6.2 $\pm$ 3.2 <sup>*</sup>       | 0.036       |             | 7.4 $\pm$ 4.5                    | 0.451       |             | 8.4 $\pm$ 6.1                 | 0.654       |             | 0.194   |
|            | LM | 10.6 $\pm$ 8.7                  |             |             | 9.5 $\pm$ 7.9                    |             |             | 9.0 $\pm$ 5.7 <sup>*</sup>       |             |             | 8.6 $\pm$ 5.5                    |             |             | 7.7 $\pm$ 5.0                 |             |             | 0.656   |



Supplementary Table S2. Continued...

| Motile VCL (μm/s) |    |                              |        |        |                              |        |       |                               |        |       |                               |       |       |                              |       |       |        |  |  |
|-------------------|----|------------------------------|--------|--------|------------------------------|--------|-------|-------------------------------|--------|-------|-------------------------------|-------|-------|------------------------------|-------|-------|--------|--|--|
| 5 min             | HM | 101.0 ± 21.0 <sup>***a</sup> | 0.015  | 0.144  | 115.5 ± 26.2 <sup>***b</sup> | 0.026  | 0.083 | 137.2 ± 29.0 <sup>***c</sup>  | <0.001 | 0.393 | 134.1 ± 22.7 <sup>***c</sup>  | 0.005 | 0.299 | 132.6 ± 25.4 <sup>***c</sup> | 0.027 | 0.865 | <0.001 |  |  |
|                   | LM | 87.6 ± 16.3 <sup>***a</sup>  |        | 0.554  | 100.9 ± 18.1 <sup>***b</sup> |        | 0.909 | 107.3 ± 18.0 <sup>***bc</sup> |        | 0.872 | 115.4 ± 21.8 <sup>***c</sup>  |       | 0.599 | 114.9 ± 29.1 <sup>***c</sup> |       | 0.862 | <0.001 |  |  |
| 30 min            | HM | 110.7 ± 24.9 <sup>***a</sup> | <0.001 |        | 128.9 ± 27.3 <sup>***b</sup> | <0.001 |       | 130.8 ± 23.5 <sup>***b</sup>  | <0.001 |       | 129.4 ± 27.2 <sup>***b</sup>  | 0.009 |       | 131.2 ± 31.2 <sup>ab</sup>   | 0.089 |       | 0.038  |  |  |
|                   | LM | 84.5 ± 19.3 <sup>***a</sup>  |        |        | 100.2 ± 18.4 <sup>***b</sup> |        |       | 108.1 ± 17.6 <sup>***bc</sup> |        |       | 111.7 ± 17.4 <sup>***bc</sup> |       |       | 116.3 ± 28.6 <sup>c</sup>    |       |       | <0.001 |  |  |
| Motile VAP (μm/s) |    |                              |        |        |                              |        |       |                               |        |       |                               |       |       |                              |       |       |        |  |  |
| 5 min             | HM | 56.4 ± 9.6 <sup>***a</sup>   | <0.001 | 0.320  | 59.1 ± 11.6 <sup>***ab</sup> | 0.012  | 0.565 | 63.7 ± 10.1 <sup>***ab</sup>  | <0.001 | 0.836 | 63.5 ± 9.7 <sup>***b</sup>    | 0.002 | 0.272 | 64.9 ± 11.3 <sup>b</sup>     | 0.467 | 0.392 | 0.022  |  |  |
|                   | LM | 45.9 ± 10.5 <sup>***a</sup>  |        | 0.147  | 51.6 ± 8.5 <sup>***b</sup>   |        | 0.244 | 53.7 ± 5.6 <sup>***bc</sup>   |        | 0.85  | 55.8 ± 6.9 <sup>***c</sup>    |       | 0.267 | 55.5 ± 14.1 <sup>bc</sup>    |       | 0.897 | <0.001 |  |  |
| 30 min            | HM | 53.4 ± 10.9 <sup>***a</sup>  | <0.001 |        | 60.9 ± 10.4 <sup>***b</sup>  | <0.001 |       | 63.1 ± 9.0 <sup>***b</sup>    | <0.001 |       | 60.6 ± 8.7 <sup>***b</sup>    | 0.004 |       | 61.8 ± 13.9 <sup>b</sup>     | 0.064 |       | 0.018  |  |  |
|                   | LM | 41.8 ± 9.1 <sup>***a</sup>   |        |        | 48.6 ± 9.0 <sup>***b</sup>   |        |       | 53.3 ± 7.7 <sup>***b</sup>    |        |       | 53.5 ± 7.5 <sup>***b</sup>    |       |       | 54.9 ± 11.6 <sup>b</sup>     |       |       | <0.001 |  |  |
| Motile VSL (μm/s) |    |                              |        |        |                              |        |       |                               |        |       |                               |       |       |                              |       |       |        |  |  |
| 5 min             | HM | 46.0 ± 10.7 <sup>***a</sup>  | 0.001  | 0.014  | 47.4 ± 13.6 <sup>***a</sup>  | 0.023  | 0.734 | 49.2 ± 11.0 <sup>***a</sup>   | 0.018  | 0.541 | 48.9 ± 10.2                   | 0.076 | 0.677 | 51.3 ± 12.7 <sup>***a</sup>  | 0.013 | 0.403 | 0.582  |  |  |
|                   | LM | 34.7 ± 12.7 <sup>***a</sup>  |        | 0.121  | 38.4 ± 10.8 <sup>***ab</sup> |        | 0.442 | 41.7 ± 7.1 <sup>***b</sup>    |        | 0.963 | 42.6 ± 8.3 <sup>***b</sup>    |       | 0.197 | 41.5 ± 14.0 <sup>***ab</sup> |       | 0.916 | 0.039  |  |  |
| 30 min            | HM | 38.4 ± 10.5 <sup>***a</sup>  | 0.005  |        | 47.3 ± 11.1 <sup>***b</sup>  | <0.001 |       | 50.3 ± 9.4 <sup>***b</sup>    | 0.002  |       | 47.1 ± 7.5 <sup>***b</sup>    | 0.004 |       | 48.0 ± 14.6 <sup>b</sup>     | 0.071 |       | 0.002  |  |  |
|                   | LM | 29.5 ± 10.5 <sup>***a</sup>  |        |        | 36.1 ± 9.8 <sup>***b</sup>   |        |       | 41.6 ± 9.8 <sup>***b</sup>    |        |       | 39.9 ± 9.2 <sup>***b</sup>    |       |       | 41.2 ± 11.0 <sup>b</sup>     |       |       | <0.001 |  |  |
| Motile STR (%)    |    |                              |        |        |                              |        |       |                               |        |       |                               |       |       |                              |       |       |        |  |  |
| 5 min             | HM | 57.8 ± 8.5 <sup>***a</sup>   | 0.036  | <0.001 | 53.7 ± 7.7                   | 0.140  | 0.436 | 49.5 ± 8.2                    | 0.992  | 0.282 | 49.6 ± 6.2                    | 0.959 | 0.612 | 51.9 ± 7.7 <sup>***a</sup>   | 0.034 | 0.327 | 0.410  |  |  |
|                   | LM | 54.0 ± 8.4 <sup>***a</sup>   |        | 0.145  | 52.9 ± 7.0                   |        | 0.368 | 52.6 ± 6.6                    |        | 0.793 | 51.8 ± 6.2                    |       | 0.375 | 50.8 ± 7.3 <sup>***a</sup>   |       | 0.734 | 0.623  |  |  |
| 30 min            | HM | 49.9 ± 4.9 <sup>***a</sup>   | 0.298  |        | 49.2 ± 6.6 <sup>***ab</sup>  | 0.047  |       | 50.6 ± 5.5 <sup>b</sup>       | 0.255  |       | 49.0 ± 4.8 <sup>b</sup>       | 0.124 |       | 48.7 ± 5.9 <sup>ab</sup>     | 0.465 |       | 0.019  |  |  |
|                   | LM | 50.9 ± 8.1                   |        |        | 50.0 ± 6.0 <sup>***a</sup>   |        |       | 51.0 ± 6.6                    |        |       | 50.2 ± 5.4                    |       |       | 49.6 ± 5.5                   |       |       | 0.060  |  |  |
| Motile LIN (%)    |    |                              |        |        |                              |        |       |                               |        |       |                               |       |       |                              |       |       |        |  |  |
| 5 min             | HM | 78.7 ± 10.7 <sup>***a</sup>  | 0.042  | <0.001 | 76.8 ± 12.3 <sup>ab</sup>    | 0.284  | 0.097 | 74.2 ± 9.4 <sup>b</sup>       | 0.229  | 0.367 | 73.8 ± 8.1 <sup>b</sup>       | 0.442 | 0.818 | 76.1 ± 9.0 <sup>ab</sup>     | 0.233 | 0.115 | 0.020  |  |  |
|                   | LM | 70.7 ± 15.1 <sup>***a</sup>  |        | 0.080  | 70.9 ± 12.0                  |        | 0.230 | 74.2 ± 8.8                    |        | 0.568 | 73.7 ± 10.3                   |       | 0.235 | 70.1 ± 10.5                  |       | 0.952 | 0.828  |  |  |
| 30 min            | HM | 68.3 ± 9.6 <sup>***a</sup>   | 0.650  |        | 74.3 ± 9.8                   | 0.489  |       | 76.7 ± 7.3                    | 0.809  |       | 74.8 ± 4.8                    | 0.716 |       | 72.5 ± 12.1                  | 0.993 |       | 0.317  |  |  |
|                   | LM | 64.8 ± 12.8                  |        |        | 68.8 ± 9.1                   |        |       | 73.7 ± 10.9                   |        |       | 70.9 ± 11.4                   |       |       | 71.1 ± 8.9                   |       |       | 0.365  |  |  |
| Motile WOB (%)    |    |                              |        |        |                              |        |       |                               |        |       |                               |       |       |                              |       |       |        |  |  |
| 5 min             | HM | 47.6 ± 12.2 <sup>***a</sup>  | 0.115  | <0.001 | 43.1 ± 11.5 <sup>***ab</sup> | 0.695  | 0.032 | 39.1 ± 11.4 <sup>b</sup>      | 0.079  | 0.299 | 38.3 ± 7.8 <sup>b</sup>       | 0.205 | 0.703 | 41.2 ± 10.1 <sup>b</sup>     | 0.630 | 0.218 | 0.001  |  |  |
|                   | LM | 40.2 ± 13.0                  |        | 0.201  | 39.7 ± 10.5                  |        | 0.128 | 41.0 ± 8.9                    |        | 0.389 | 40.1 ± 8.5                    |       | 0.328 | 37.6 ± 10.1                  |       | 0.504 | 0.613  |  |  |
| 30 min            | HM | 35.5 ± 7.3 <sup>***a</sup>   | 0.606  |        | 38.1 ± 9.0 <sup>***a</sup>   | 0.687  |       | 40.1 ± 7.6                    | 0.819  |       | 37.8 ± 5.2                    | 0.422 |       | 36.8 ± 9.1                   | 0.478 |       | 0.765  |  |  |
|                   | LM | 34.4 ± 9.1                   |        |        | 36.5 ± 7.9                   |        |       | 39.5 ± 9.7                    |        |       | 37.1 ± 8.5                    |       |       | 36.8 ± 7.3                   |       |       | 0.929  |  |  |
| Motile ALH (μm)   |    |                              |        |        |                              |        |       |                               |        |       |                               |       |       |                              |       |       |        |  |  |
| 5 min             | HM | 2.6 ± 0.8 <sup>***a</sup>    | 0.655  | 0.003  | 3.0 ± 0.8 <sup>***a</sup>    | 0.367  | 0.006 | 3.8 ± 1.0 <sup>***b</sup>     | 0.001  | 0.780 | 3.7 ± 0.6 <sup>***b</sup>     | 0.030 | 0.727 | 3.6 ± 0.8 <sup>b</sup>       | 0.092 | 0.550 | <0.001 |  |  |
|                   | LM | 2.4 ± 0.5 <sup>***a</sup>    |        | 0.313  | 2.8 ± 0.6 <sup>***b</sup>    |        | 0.447 | 3.0 ± 0.6 <sup>***b</sup>     |        | 0.622 | 3.2 ± 0.8 <sup>***b</sup>     |       | 0.734 | 3.2 ± 0.8 <sup>b</sup>       |       | 0.551 | <0.001 |  |  |
| 30 min            | HM | 3.2 ± 0.7 <sup>***a</sup>    | <0.001 |        | 3.6 ± 0.9 <sup>***a</sup>    | <0.001 |       | 3.7 ± 0.7 <sup>***a</sup>     | 0.001  |       | 3.7 ± 0.7 <sup>***a</sup>     | 0.020 |       | 3.7 ± 0.9                    | 0.105 |       | 0.148  |  |  |
|                   | LM | 2.5 ± 0.5 <sup>***a</sup>    |        |        | 2.9 ± 0.5 <sup>***b</sup>    |        |       | 3.0 ± 0.6 <sup>***b</sup>     |        |       | 3.3 ± 0.6 <sup>***b</sup>     |       |       | 3.3 ± 0.8 <sup>b</sup>       |       |       | <0.001 |  |  |
| Motile BCF (Hz)   |    |                              |        |        |                              |        |       |                               |        |       |                               |       |       |                              |       |       |        |  |  |
| 5 min             | HM | 23.2 ± 4.4 <sup>***a</sup>   | 0.206  | <0.001 | 23.2 ± 4.5 <sup>***a</sup>   | 0.060  | 0.015 | 21.3 ± 4.3                    | 0.728  | 0.230 | 20.7 ± 3.8                    | 0.951 | 0.268 | 21.9 ± 3.6 <sup>***a</sup>   | 0.121 | 0.024 | 0.128  |  |  |
|                   | LM | 21.6 ± 4.3 <sup>***a</sup>   |        | 0.004  | 20.9 ± 3.7                   |        | 0.233 | 20.9 ± 2.9                    |        | 0.298 | 20.7 ± 3.2                    |       | 0.071 | 20.3 ± 3.5                   |       | 0.502 | 0.758  |  |  |
| 30 min            | HM | 18.9 ± 2.8 <sup>***a</sup>   | 0.382  |        | 20.4 ± 3.0 <sup>***a</sup>   | 0.464  |       | 20.0 ± 2.8                    | 0.981  |       | 19.7 ± 2.7                    | 0.392 |       | 19.7 ± 2.8 <sup>***a</sup>   | 0.927 |       | 0.398  |  |  |
|                   | LM | 18.0 ± 4.0 <sup>***a</sup>   |        |        | 19.8 ± 3.0                   |        |       | 20.0 ± 2.8                    |        |       | 19.0 ± 3.1                    |       |       | 19.6 ± 2.9                   |       |       | 0.179  |  |  |

Supplementary Table S2. Continued...

| NPVCL (μm/s)  |    |                              |        |        |                             |       |       |                              |       |       |                             |       |       |                           |       |       |        |  |  |
|---------------|----|------------------------------|--------|--------|-----------------------------|-------|-------|------------------------------|-------|-------|-----------------------------|-------|-------|---------------------------|-------|-------|--------|--|--|
| 5 min         | HM | 60.9 ± 7.7 <sup>**</sup>     | 0.007  | 0.250  | 59.4 ± 10.4                 | 0.372 | 0.706 | 60.0 ± 9.9                   | 0.108 | 0.757 | 64.6 ± 13.5                 | 0.138 | 0.447 | 59.1 ± 10.0               | 0.832 | 0.911 | 0.350  |  |  |
|               | LM | 55.3 ± 10.1 <sup>**</sup>    |        | 0.111  | 58.5 ± 11.9                 |       | 0.254 | 56.0 ± 7.5 <sup>**</sup>     |       | 0.006 | 59.6 ± 9.4                  |       | 0.415 | 59.5 ± 10.4               |       | 0.358 | 0.433  |  |  |
| 30 min        | HM | 58.4 ± 7.4                   | 0.631  |        | 58.3 ± 10.9                 | 0.289 |       | 61.6 ± 7.7                   | 0.472 |       | 62.2 ± 7.7                  | 0.685 |       | 58.8 ± 8.1                | 0.276 |       | 0.311  |  |  |
|               | LM | 57.6 ± 8.0                   |        |        | 61.4 ± 9.5                  |       |       | 62.1 ± 7.4 <sup>**</sup>     |       |       | 61.4 ± 4.9                  |       |       | 61.2 ± 6.6                |       |       | 0.244  |  |  |
| NPVAP (μm/s)  |    |                              |        |        |                             |       |       |                              |       |       |                             |       |       |                           |       |       |        |  |  |
| 5 min         | HM | 33.9 ± 6.1 <sup>**</sup>     | 0.001  | 0.076  | 32.9 ± 7.4 <sup>**</sup>    | 0.190 | 0.008 | 30.2 ± 7.1                   | 0.885 | 0.389 | 29.7 ± 6.0                  | 0.069 | 0.780 | 32.7 ± 9.1                | 0.428 | 0.179 | 0.185  |  |  |
|               | LM | 28.7 ± 5.2 <sup>**</sup>     |        | 0.059  | 30.4 ± 10.0                 |       | 0.968 | 30.2 ± 5.6                   |       | 0.920 | 33.9 ± 7.4                  |       | 0.502 | 30.9 ± 6.3                |       | 0.258 | 0.166  |  |  |
| 30 min        | HM | 31.2 ± 6.8                   | 0.675  |        | 27.2 ± 7.1 <sup>**</sup>    | 0.188 |       | 32.0 ± 7.0                   | 0.472 |       | 29.5 ± 5.9                  | 0.100 |       | 29.4 ± 7.3                | 0.741 |       | 0.138  |  |  |
|               | LM | 29.2 ± 6.9                   |        |        | 29.9 ± 6.8                  |       |       | 30.1 ± 5.0                   |       |       | 32.4 ± 5.9                  |       |       | 28.7 ± 6.9                |       |       | 0.326  |  |  |
| NPVSL (μm/s)  |    |                              |        |        |                             |       |       |                              |       |       |                             |       |       |                           |       |       |        |  |  |
| 5 min         | HM | 24.7 ± 8.1 <sup>***</sup>    | <0.001 | 0.014  | 22.9 ± 9.4 <sup>*</sup>     | 0.367 | 0.035 | 21.1 ± 8.1                   | 0.898 | 0.805 | 18.1 ± 7.4 <sup>**</sup>    | 0.005 | 0.745 | 22.9 ± 11.8               | 0.299 | 0.123 | 0.122  |  |  |
|               | LM | 17.1 ± 5.0 <sup>***</sup>    |        | 0.767  | 20.1 ± 9.2 <sup>ab</sup>    |       | 0.905 | 20.8 ± 7.2 <sup>ab</sup>     |       | 0.749 | 24.4 ± 7.6 <sup>***</sup>   |       | 0.042 | 19.8 ± 8.2 <sup>ab</sup>  |       | 0.225 | 0.030  |  |  |
| 30 min        | HM | 19.6 ± 8.9 <sup>*</sup>      | 0.675  |        | 18.0 ± 6.4 <sup>*</sup>     | 0.485 |       | 21.4 ± 7.8                   | 0.928 |       | 18.7 ± 4.6                  | 0.645 |       | 18.2 ± 8.4                | 0.647 |       | 0.492  |  |  |
|               | LM | 17.4 ± 6.1                   |        |        | 19.3 ± 6.9                  |       |       | 20.2 ± 5.9                   |       |       | 19.6 ± 8.0 <sup>*</sup>     |       |       | 17.1 ± 6.9                |       |       | 0.401  |  |  |
| NPSTR (%)     |    |                              |        |        |                             |       |       |                              |       |       |                             |       |       |                           |       |       |        |  |  |
| 5 min         | HM | 68.4 ± 14.0 <sup>*</sup>     | 0.015  | 0.038  | 66.8 ± 17.5                 | 0.186 | 0.406 | 65.3 ± 13.8                  | 0.849 | 0.558 | 56.8 ± 18.1 <sup>*</sup>    | 0.016 | 0.292 | 65.1 ± 21.3               | 0.382 | 0.186 | 0.152  |  |  |
|               | LM | 57.4 ± 15.7 <sup>*</sup>     |        | 0.733  | 61.2 ± 11.3                 |       | 0.650 | 64.5 ± 16.4                  |       | 0.728 | 67.7 ± 11.8 <sup>**</sup>   |       | 0.021 | 60.3 ± 16.4               |       | 0.413 | 0.140  |  |  |
| 30 min        | HM | 59.4 ± 15.6 <sup>*</sup>     | 0.413  |        | 63.0 ± 14.2                 | 0.392 |       | 63.0 ± 12.7                  | 0.999 |       | 61.1 ± 8.0                  | 0.420 |       | 57.6 ± 16.8               | 0.805 |       | 0.588  |  |  |
|               | LM | 55.9 ± 14.1                  |        |        | 59.6 ± 13.4                 |       |       | 63.0 ± 12.0                  |       |       | 58.3 ± 15.0 <sup>*</sup>    |       |       | 56.4 ± 16.4               |       |       | 0.411  |  |  |
| NPLIN (%)     |    |                              |        |        |                             |       |       |                              |       |       |                             |       |       |                           |       |       |        |  |  |
| 5 min         | HM | 41.3 ± 14.4 <sup>*</sup>     | 0.013  | 0.015  | 39.1 ± 15.2 <sup>*</sup>    | 0.421 | 0.048 | 35.2 ± 13.3                  | 0.473 | 0.665 | 29.7 ± 13.8 <sup>**</sup>   | 0.002 | 0.857 | 39.7 ± 20.4               | 0.265 | 0.081 | 0.073  |  |  |
|               | LM | 31.7 ± 10.3 <sup>*</sup>     |        | 0.640  | 35.1 ± 15.0                 |       | 0.749 | 38.1 ± 14.7                  |       | 0.172 | 41.4 ± 10.9 <sup>**</sup>   |       | 0.018 | 34.0 ± 14.4               |       | 0.185 | 0.116  |  |  |
| 30 min        | HM | 33.3 ± 17.0 <sup>*</sup>     | 0.984  |        | 31.3 ± 11.6 <sup>*</sup>    | 0.844 |       | 34.4 ± 12.9                  | 1     |       | 30.3 ± 5.8                  | 0.462 |       | 30.9 ± 15.0               | 0.358 |       | 0.794  |  |  |
|               | LM | 30.3 ± 10.6                  |        |        | 31.9 ± 10.9                 |       |       | 33.0 ± 11.3                  |       |       | 32.5 ± 13.5 <sup>*</sup>    |       |       | 28.9 ± 11.9               |       |       | 0.734  |  |  |
| NPWOB (%)     |    |                              |        |        |                             |       |       |                              |       |       |                             |       |       |                           |       |       |        |  |  |
| 5 min         | HM | 56.3 ± 10.5 <sup>+</sup>     | 0.221  | 0.028  | 56.1 ± 10.5 <sup>**ab</sup> | 0.134 | 0.003 | 50.6 ± 10.8 <sup>d</sup>     | 0.181 | 0.621 | 47.6 ± 11.6 <sup>**ab</sup> | 0.001 | 0.842 | 55.9 ± 14.3 <sup>b</sup>  | 0.375 | 0.124 | 0.023  |  |  |
|               | LM | 52.7 ± 9.5                   |        | 0.742  | 51.7 ± 9.8                  |       | 0.378 | 54.6 ± 9.9                   |       | 0.055 | 57.2 ± 7.2 <sup>**</sup>    |       | 0.052 | 52.6 ± 10.8               |       | 0.129 | 0.287  |  |  |
| 30 min        | HM | 52.7 ± 12.9 <sup>*</sup>     | 0.617  |        | 46.8 ± 10.3 <sup>**</sup>   | 0.372 |       | 52.2 ± 9.8                   | 0.617 |       | 47.9 ± 6.6                  | 0.104 |       | 50.1 ± 10.9               | 0.407 |       | 0.193  |  |  |
|               | LM | 50.6 ± 10.6                  |        |        | 49.3 ± 9.0                  |       |       | 49.1 ± 9.6                   |       |       | 53.1 ± 9.9                  |       |       | 47.4 ± 11.3               |       |       | 0.422  |  |  |
| MP VCL (μm/s) |    |                              |        |        |                             |       |       |                              |       |       |                             |       |       |                           |       |       |        |  |  |
| 5 min         | HM | 109.5 ± 22.9 <sup>***</sup>  | 0.873  | <0.001 | 123.5 ± 35.1 <sup>d</sup>   | 0.603 | 0.081 | 149.2 ± 37.4 <sup>***</sup>  | 0.002 | 0.345 | 148.4 ± 28.6 <sup>b</sup>   | 0.105 | 0.443 | 145.1 ± 26.5 <sup>b</sup> | 0.863 | 0.806 | <0.001 |  |  |
|               | LM | 108.2 ± 18.3 <sup>d</sup>    |        | 0.288  | 116.2 ± 23.5 <sup>d</sup>   |       | 0.203 | 121.2 ± 22.3 <sup>**ab</sup> |       | 0.740 | 134.7 ± 30.3 <sup>bc</sup>  |       | 0.672 | 143.6 ± 30.6 <sup>c</sup> |       | 0.343 | <0.001 |  |  |
| 30 min        | HM | 130.4 ± 19.9 <sup>****</sup> | 0.007  |        | 139.9 ± 29.7 <sup>*</sup>   | 0.043 |       | 139.5 ± 34.6 <sup>*</sup>    | 0.018 |       | 143.8 ± 31.4                | 0.124 |       | 143.1 ± 30.8              | 0.368 |       | 0.541  |  |  |
|               | LM | 114.0 ± 17.7 <sup>**</sup>   |        |        | 124.0 ± 18.8 <sup>ab</sup>  |       |       | 119.0 ± 23.5 <sup>ab</sup>   |       |       | 131.0 ± 23.1 <sup>ab</sup>  |       |       | 135.1 ± 30.3 <sup>b</sup> |       |       | 0.022  |  |  |
| MP VAP (μm/s) |    |                              |        |        |                             |       |       |                              |       |       |                             |       |       |                           |       |       |        |  |  |
| 5 min         | HM | 58.7 ± 8.3 <sup>*</sup>      | 0.028  | 0.881  | 60.0 ± 9.7                  | 0.245 | 0.751 | 63.1 ± 7.4 <sup>**</sup>     | 0.003 | 0.916 | 64.3 ± 9.3                  | 0.337 | 0.290 | 64.0 ± 7.0                | 0.199 | 0.161 | 0.068  |  |  |
|               | LM | 54.1 ± 5.8 <sup>+</sup>      |        | 0.427  | 57.2 ± 6.7 <sup>ab</sup>    |       | 0.710 | 57.2 ± 5.7 <sup>**ab</sup>   |       | 0.923 | 60.7 ± 9.4 <sup>d</sup>     |       | 0.074 | 61.0 ± 8.9 <sup>b</sup>   |       | 0.363 | 0.013  |  |  |
| 30 min        | HM | 59.1 ± 7.4 <sup>**</sup>     | 0.005  |        | 60.8 ± 8.3 <sup>*</sup>     | 0.048 |       | 62.9 ± 8.5 <sup>**</sup>     | 0.005 |       | 61.0 ± 6.8 <sup>*</sup>     | 0.016 |       | 60.8 ± 9.0                | 0.414 |       | 0.603  |  |  |
|               | LM | 52.4 ± 7.5 <sup>**</sup>     |        |        | 56.5 ± 5.0 <sup>ab</sup>    |       |       | 57.1 ± 4.7 <sup>**ab</sup>   |       |       | 56.3 ± 7.4 <sup>ab</sup>    |       |       | 58.8 ± 8.1 <sup>b</sup>   |       |       | 0.041  |  |  |

Supplementary Table S2. Continued...

| MP VSL ( $\mu\text{m/s}$ ) |    |                                  |        |        |                                   |        |       |                                   |        |       |                               |       |       |                                |       |       |        |
|----------------------------|----|----------------------------------|--------|--------|-----------------------------------|--------|-------|-----------------------------------|--------|-------|-------------------------------|-------|-------|--------------------------------|-------|-------|--------|
| 5 min                      | HM | 45.3 $\pm$ 9.7 <sup>**</sup>     | 0.131  | 0.002  | 44.8 $\pm$ 11.1                   | 0.162  | 0.248 | 41.0 $\pm$ 6.8                    | 0.814  | 0.178 | 40.9 $\pm$ 10.0               | 0.999 | 0.662 | 41.4 $\pm$ 9.9                 | 0.223 | 0.450 | 0.280  |
|                            | LM | 40.8 $\pm$ 10.7                  |        | 0.209  | 39.6 $\pm$ 10.5                   |        | 0.636 | 41.5 $\pm$ 7.9                    |        | 0.899 | 40.9 $\pm$ 7.9                |       | 0.129 | 38.1 $\pm$ 8.5                 |       | 0.567 | 0.737  |
| 30 min                     | HM | 37.2 $\pm$ 7.1 <sup>**a</sup>    | 1      |        | 40.6 $\pm$ 8.5 <sup>ab</sup>      | 0.323  |       | 44.6 $\pm$ 10.3 <sup>b</sup>      | 0.961  |       | 40.4 $\pm$ 4.8 <sup>ab</sup>  | 0.114 |       | 39.5 $\pm$ 8.0 <sup>ab</sup>   | 0.962 |       | 0.030  |
|                            | LM | 37.2 $\pm$ 7.1                   |        |        | 38.3 $\pm$ 6.7                    |        |       | 41.8 $\pm$ 7.3                    |        |       | 36.3 $\pm$ 9.3                |       |       | 39.6 $\pm$ 9.0                 |       |       | 0.189  |
| MP STR (%)                 |    |                                  |        |        |                                   |        |       |                                   |        |       |                               |       |       |                                |       |       |        |
| 5 min                      | HM | 57.2 $\pm$ 11.2 <sup>***a</sup>  | 0.582  | <0.001 | 54.1 $\pm$ 11.7 <sup>**a</sup>    | 0.174  | 0.037 | 46.8 $\pm$ 9.8 <sup>b</sup>       | 0.083  | 0.073 | 47.1 $\pm$ 9.5 <sup>b</sup>   | 0.315 | 0.300 | 48.7 $\pm$ 9.3 <sup>b</sup>    | 0.651 | 0.999 | <0.001 |
|                            | LM | 53.1 $\pm$ 11.7                  |        | 0.31   | 52.7 $\pm$ 9.1                    |        | 0.702 | 51.6 $\pm$ 8.3                    |        | 0.563 | 48.6 $\pm$ 9.8                |       | 0.404 | 45.9 $\pm$ 7.6                 |       | 0.175 | 0.074  |
| 30 min                     | HM | 47.9 $\pm$ 6.4 <sup>***</sup>    | 0.092  |        | 47.2 $\pm$ 9.1 <sup>*</sup>       | 0.914  |       | 50.1 $\pm$ 13.1                   | 0.490  |       | 45.8 $\pm$ 6.5                | 0.414 |       | 45.3 $\pm$ 6.5                 | 0.335 |       | 0.317  |
|                            | LM | 48.1 $\pm$ 7.5                   |        |        | 48.3 $\pm$ 7.3                    |        |       | 51.5 $\pm$ 8.4                    |        |       | 46.2 $\pm$ 7.5                |       |       | 47.3 $\pm$ 10.3                |       |       | 0.182  |
| MP LIN (%)                 |    |                                  |        |        |                                   |        |       |                                   |        |       |                               |       |       |                                |       |       |        |
| 5 min                      | HM | 77.7 $\pm$ 13.2 <sup>***a</sup>  | 0.309  | <0.001 | 75.9 $\pm$ 15.5 <sup>**a</sup>    | 0.349  | 0.018 | 65.5 $\pm$ 12.3 <sup>**b</sup>    | 0.032  | 0.160 | 64.4 $\pm$ 12.0 <sup>b</sup>  | 0.357 | 0.410 | 65.2 $\pm$ 15.5 <sup>b</sup>   | 0.459 | 0.389 | <0.001 |
|                            | LM | 75.4 $\pm$ 15.6 <sup>d</sup>     |        | 0.112  | 69.5 $\pm$ 17.0 <sup>ab</sup>     |        | 0.202 | 71.5 $\pm$ 11.4 <sup>**ab</sup>   |        | 0.853 | 68.2 $\pm$ 14.4 <sup>ab</sup> |       | 0.599 | 63.3 $\pm$ 14.1 <sup>b</sup>   |       | 0.328 | 0.046  |
| 30 min                     | HM | 64.6 $\pm$ 12.0 <sup>***</sup>   | 0.278  |        | 67.4 $\pm$ 12.1 <sup>*</sup>      | 0.794  |       | 71.0 $\pm$ 12.0                   | 0.211  |       | 67.7 $\pm$ 9.8                | 0.837 |       | 65.2 $\pm$ 11.7                | 0.328 |       | 0.268  |
|                            | LM | 71.0 $\pm$ 12.4                  |        |        | 67.8 $\pm$ 10.6                   |        |       | 73.5 $\pm$ 13.3                   |        |       | 64.5 $\pm$ 16.3               |       |       | 68.5 $\pm$ 11.8                |       |       | 0.170  |
| MP WOB (%)                 |    |                                  |        |        |                                   |        |       |                                   |        |       |                               |       |       |                                |       |       |        |
| 5 min                      | HM | 47.1 $\pm$ 15.1 <sup>***a</sup>  | 0.218  | <0.001 | 43.7 $\pm$ 16.4 <sup>**ab</sup>   | 0.656  | 0.026 | 33.2 $\pm$ 13.0 <sup>b</sup>      | 0.064  | 0.357 | 32.3 $\pm$ 12.7 <sup>b</sup>  | 0.367 | 0.600 | 34.1 $\pm$ 14.0 <sup>b</sup>   | 0.388 | 0.135 | 0.001  |
|                            | LM | 42.5 $\pm$ 15.9 <sup>d</sup>     |        | 0.100  | 39.5 $\pm$ 14.4 <sup>d</sup>      |        | 0.092 | 39.4 $\pm$ 11.4 <sup>d</sup>      |        | 0.957 | 35.4 $\pm$ 12.8 <sup>d</sup>  |       | 0.477 | 31.3 $\pm$ 12.0 <sup>ab</sup>  |       | 0.734 | 0.046  |
| 30 min                     | HM | 32.7 $\pm$ 9.5 <sup>***</sup>    | 0.923  |        | 33.8 $\pm$ 11.8 <sup>*</sup>      | 0.664  |       | 38.1 $\pm$ 16.8                   | 0.184  |       | 32.4 $\pm$ 8.2                | 0.889 |       | 31.2 $\pm$ 9.3                 | 0.734 |       | 0.323  |
|                            | LM | 35.9 $\pm$ 9.7                   |        |        | 34.7 $\pm$ 9.6                    |        |       | 40.0 $\pm$ 12.2                   |        |       | 31.9 $\pm$ 11.3               |       |       | 34.6 $\pm$ 13.0                |       |       | 0.251  |
| MP ALH ( $\mu\text{m}$ )   |    |                                  |        |        |                                   |        |       |                                   |        |       |                               |       |       |                                |       |       |        |
| 5 min                      | HM | 2.9 $\pm$ 1.0 <sup>***a</sup>    | 0.804  | <0.001 | 3.3 $\pm$ 1.3 <sup>**a</sup>      | 0.774  | 0.040 | 4.3 $\pm$ 1.4 <sup>***b</sup>     | 0.009  | 0.517 | 4.3 $\pm$ 1.0 <sup>b</sup>    | 0.172 | 0.600 | 4.2 $\pm$ 1.0 <sup>b</sup>     | 0.872 | 0.744 | <0.001 |
|                            | LM | 3.0 $\pm$ 0.9 <sup>d</sup>       |        | 0.064  | 3.2 $\pm$ 1.0 <sup>ab</sup>       |        | 0.139 | 3.4 $\pm$ 0.9 <sup>**ab</sup>     |        | 0.953 | 3.9 $\pm$ 1.1 <sup>ab</sup>   |       | 0.773 | 4.2 $\pm$ 1.0 <sup>b</sup>     |       | 0.323 | <0.001 |
| 30 min                     | HM | 3.9 $\pm$ 0.8 <sup>***</sup>     | 0.032  |        | 4.0 $\pm$ 1.1 <sup>*</sup>        | 0.160  |       | 4.1 $\pm$ 1.4                     | 0.069  |       | 4.3 $\pm$ 1.0                 | 0.327 |       | 4.3 $\pm$ 1.1                  | 0.251 |       | 0.746  |
|                            | LM | 3.4 $\pm$ 0.7 <sup>*</sup>       |        |        | 3.6 $\pm$ 0.7                     |        |       | 3.4 $\pm$ 0.9                     |        |       | 4.0 $\pm$ 0.9                 |       |       | 3.9 $\pm$ 1.1                  |       |       | 0.131  |
| MP BCF (Hz)                |    |                                  |        |        |                                   |        |       |                                   |        |       |                               |       |       |                                |       |       |        |
| 5 min                      | HM | 22.7 $\pm$ 4.1 <sup>***a</sup>   | 0.716  | <0.001 | 23.2 $\pm$ 5.6 <sup>**a</sup>     | 0.123  | 0.003 | 19.3 $\pm$ 4.8 <sup>b</sup>       | 0.406  | 0.930 | 18.9 $\pm$ 3.8 <sup>b</sup>   | 0.540 | 0.319 | 19.8 $\pm$ 4.0 <sup>b</sup>    | 0.118 | 0.142 | 0.001  |
|                            | LM | 22.2 $\pm$ 4.7 <sup>**a</sup>    |        | 0.007  | 21.0 $\pm$ 4.3 <sup>ab</sup>      |        | 0.147 | 20.3 $\pm$ 3.6 <sup>ab</sup>      |        | 0.524 | 19.6 $\pm$ 4.6 <sup>ab</sup>  |       | 0.066 | 18.1 $\pm$ 3.2 <sup>b</sup>    |       | 1     | 0.015  |
| 30 min                     | HM | 18.1 $\pm$ 3.1 <sup>***</sup>    | 0.925  |        | 18.9 $\pm$ 4.1 <sup>*</sup>       | 0.911  |       | 19.2 $\pm$ 5.1                    | 0.282  |       | 18.0 $\pm$ 2.3                | 0.427 |       | 18.0 $\pm$ 4.4                 | 1     |       | 0.725  |
|                            | LM | 18.5 $\pm$ 3.8 <sup>**</sup>     |        |        | 19.1 $\pm$ 4.3                    |        |       | 19.7 $\pm$ 3.8                    |        |       | 17.2 $\pm$ 4.3                |       |       | 18.6 $\pm$ 4.0                 |       |       | 0.304  |
| RP VCL ( $\mu\text{m/s}$ ) |    |                                  |        |        |                                   |        |       |                                   |        |       |                               |       |       |                                |       |       |        |
| 5 min                      | HM | 125.9 $\pm$ 17.7 <sup>**a</sup>  | 0.576  | 0.001  | 137.5 $\pm$ 16.2 <sup>***b</sup>  | 0.718  | 0.006 | 151.7 $\pm$ 19.4 <sup>***bc</sup> | <0.001 | 0.399 | 151.7 $\pm$ 23.5 <sup>d</sup> | 0.353 | 0.778 | 150.2 $\pm$ 22.7 <sup>d</sup>  | 0.089 | 0.401 | <0.001 |
|                            | LM | 129.0 $\pm$ 17.3 <sup>d</sup>    |        | 0.339  | 135.3 $\pm$ 20.6 <sup>ab</sup>    |        | 0.729 | 132.3 $\pm$ 15.2 <sup>***a</sup>  |        | 0.163 | 146.2 $\pm$ 16.0 <sup>b</sup> |       | 0.093 | 139.4 $\pm$ 20.7 <sup>ab</sup> |       | 0.261 | 0.024  |
| 30 min                     | HM | 144.1 $\pm$ 18.7 <sup>***</sup>  | <0.001 |        | 151.6 $\pm$ 17.6 <sup>***</sup>   | <0.001 |       | 146.6 $\pm$ 20.1                  | 0.251  |       | 150.0 $\pm$ 21.3              | 0.068 |       | 155.6 $\pm$ 19.9               | 0.262 |       | 0.320  |
|                            | LM | 122.9 $\pm$ 11.2 <sup>***a</sup> |        |        | 133.3 $\pm$ 18.0 <sup>***ab</sup> |        |       | 139.7 $\pm$ 20.9 <sup>b</sup>     |        |       | 140.2 $\pm$ 23.3 <sup>b</sup> |       |       | 146.1 $\pm$ 18.7 <sup>b</sup>  |       |       | 0.005  |
| RP VAP ( $\mu\text{m/s}$ ) |    |                                  |        |        |                                   |        |       |                                   |        |       |                               |       |       |                                |       |       |        |
| 5 min                      | HM | 73.3 $\pm$ 9.9                   | 0.243  | 0.600  | 74.4 $\pm$ 10.6                   | 0.270  | 0.580 | 76.3 $\pm$ 9.3 <sup>**</sup>      | 0.004  | 0.877 | 77.7 $\pm$ 11.2               | 0.201 | 0.884 | 76.8 $\pm$ 9.6                 | 0.702 | 0.459 | 0.532  |
|                            | LM | 69.0 $\pm$ 13.5                  |        | 0.178  | 71.1 $\pm$ 9.4                    |        | 0.329 | 69.4 $\pm$ 6.5 <sup>**</sup>      |        | 0.204 | 73.2 $\pm$ 6.5                |       | 0.258 | 75.6 $\pm$ 12.6                |       | 0.537 | 0.275  |
| 30 min                     | HM | 74.8 $\pm$ 9.2 <sup>***</sup>    | <0.001 |        | 75.9 $\pm$ 8.5 <sup>***</sup>     | 0.010  |       | 75.6 $\pm$ 8.7                    | 0.161  |       | 76.2 $\pm$ 10.0 <sup>*</sup>  | 0.017 |       | 78.9 $\pm$ 9.7                 | 0.064 |       | 0.616  |
|                            | LM | 63.7 $\pm$ 8.7 <sup>***a</sup>   |        |        | 70.0 $\pm$ 6.4 <sup>***b</sup>    |        |       | 72.3 $\pm$ 7.1 <sup>b</sup>       |        |       | 70.0 $\pm$ 7.0 <sup>b</sup>   |       |       | 73.6 $\pm$ 9.3 <sup>b</sup>    |       |       | 0.002  |



Supplementary Table S2. Continued...

| RP VSL ( $\mu\text{m/s}$ ) |    |                                                 |              |                  |                                                  |              |                  |                                                 |              |       |                                              |              |       |                                                |       |              |                  |
|----------------------------|----|-------------------------------------------------|--------------|------------------|--------------------------------------------------|--------------|------------------|-------------------------------------------------|--------------|-------|----------------------------------------------|--------------|-------|------------------------------------------------|-------|--------------|------------------|
| 5 min                      | HM | 67.8 $\pm$ 9.8                                  | 0.058        | 0.921            | 68.4 $\pm$ 10.5                                  | 0.141        | 0.765            | 68.4 $\pm$ 9.9                                  | 0.073        | 0.467 | 70.1 $\pm$ 11.5                              | 0.183        | 0.969 | 69.0 $\pm$ 9.6                                 | 0.909 | 0.545        | 0.945            |
|                            | LM | 61.2 $\pm$ 12.0                                 |              | 0.277            | 64.1 $\pm$ 9.2                                   |              | 0.682            | 62.8 $\pm$ 7.4                                  |              | 0.207 | 65.7 $\pm$ 6.2                               |              | 0.398 | 68.7 $\pm$ 13.0                                |       | 0.369        | 0.301            |
| 30 min                     | HM | <b>67.5 <math>\pm</math> 8.6<sup>***</sup></b>  | <b>0.001</b> |                  | <b>67.6 <math>\pm</math> 8.3<sup>*</sup></b>     | <b>0.049</b> |                  | 68.0 $\pm$ 8.2                                  | 0.265        |       | <b>68.7 <math>\pm</math> 9.8<sup>*</sup></b> | 0.025        |       | 70.7 $\pm$ 9.3                                 | 0.065 |              | 0.715            |
|                            | LM | <b>57.1 <math>\pm</math> 9.7<sup>***a</sup></b> |              |                  | <b>63.1 <math>\pm</math> 6.5<sup>b</sup></b>     |              |                  | 65.5 $\pm$ 7.0 <sup>b</sup>                     |              |       | <b>63.1 <math>\pm</math> 6.2<sup>*</sup></b> | <sup>b</sup> |       | 65.7 $\pm$ 8.5 <sup>b</sup>                    |       |              | <b>0.006</b>     |
| RP STR (%)                 |    |                                                 |              |                  |                                                  |              |                  |                                                 |              |       |                                              |              |       |                                                |       |              |                  |
| 5 min                      | HM | 92.2 $\pm$ 3.3 <sup>a</sup>                     | 0.102        | <b>0.012</b>     | 91.0 $\pm$ 2.5 <sup>***ab</sup>                  | 0.154        | <b>0.001</b>     | 89.1 $\pm$ 3.1 <sup>b</sup>                     | 0.292        | 0.444 | 90.0 $\pm$ 2.5 <sup>b</sup>                  | 0.628        | 0.961 | 89.5 $\pm$ 2.4 <sup>b</sup>                    | 0.349 | 0.736        | <b>0.001</b>     |
|                            | LM | 90.3 $\pm$ 4.0                                  |              | 0.356            | 89.7 $\pm$ 3.0                                   |              | 0.910            | 90.1 $\pm$ 3.1                                  |              | 0.84  | 89.5 $\pm$ 2.4                               |              | 0.869 | 90.3 $\pm$ 3.2                                 |       | 0.130        | 0.889            |
| 30 min                     | HM | <b>90.0 <math>\pm</math> 2.2<sup>*</sup></b>    | 0.371        |                  | <b>88.7 <math>\pm</math> 2.1<sup>***</sup></b>   | 0.154        |                  | 89.7 $\pm$ 2.0                                  | 0.436        |       | 89.8 $\pm$ 1.9                               | 0.620        |       | 89.3 $\pm$ 2.2                                 | 0.748 |              | 0.282            |
|                            | LM | 89.0 $\pm$ 3.8                                  |              |                  | 89.9 $\pm$ 3.3                                   |              |                  | 90.2 $\pm$ 2.8                                  |              |       | 89.5 $\pm$ 2.3                               |              |       | 89.1 $\pm$ 1.6                                 |       |              | 0.604            |
| RP LIN (%)                 |    |                                                 |              |                  |                                                  |              |                  |                                                 |              |       |                                              |              |       |                                                |       |              |                  |
| 5 min                      | HM | <b>55.2 <math>\pm</math> 8.9<sup>a</sup></b>    | 0.071        | <b>0.011</b>     | <b>50.8 <math>\pm</math> 7.1<sup>***ab</sup></b> | 0.352        | <b>0.005</b>     | 46.8 $\pm$ 8.4 <sup>b</sup>                     | 0.190        | 0.377 | 48.1 $\pm$ 7.6 <sup>b</sup>                  | 0.477        | 0.930 | 48.4 $\pm$ 7.4 <sup>b</sup>                    | 0.411 | 0.343        | <b>0.003</b>     |
|                            | LM | 49.7 $\pm$ 11.0                                 |              | 0.358            | 48.9 $\pm$ 7.3                                   |              | 0.897            | 49.0 $\pm$ 9.0                                  |              | 0.804 | 46.3 $\pm$ 5.6                               |              | 0.423 | <b>50.2 <math>\pm</math> 7.9<sup>*</sup></b>   |       | <b>0.032</b> | 0.474            |
| 30 min                     | HM | <b>48.2 <math>\pm</math> 6.4<sup>*</sup></b>    | 0.521        |                  | <b>45.7 <math>\pm</math> 4.9<sup>***</sup></b>   | 0.098        |                  | 47.5 $\pm$ 5.1                                  | 0.597        |       | 47.1 $\pm$ 4.4                               | 0.975        |       | 46.6 $\pm$ 5.3                                 | 0.640 |              | 0.555            |
|                            | LM | 46.8 $\pm$ 6.9                                  |              |                  | 48.6 $\pm$ 6.7                                   |              |                  | 48.5 $\pm$ 7.1                                  |              |       | 46.7 $\pm$ 6.5                               |              |       | <b>45.9 <math>\pm</math> 4.6<sup>*</sup></b>   |       |              | 0.566            |
| RP WOB (%)                 |    |                                                 |              |                  |                                                  |              |                  |                                                 |              |       |                                              |              |       |                                                |       |              |                  |
| 5 min                      | HM | <b>59.4 <math>\pm</math> 7.6<sup>***a</sup></b> | 0.053        | <b>0.010</b>     | <b>55.4 <math>\pm</math> 6.6<sup>***ab</sup></b> | 0.471        | <b>0.013</b>     | 51.9 $\pm$ 7.5 <sup>b</sup>                     | 0.204        | 0.304 | 53.1 $\pm$ 7.1 <sup>b</sup>                  | 0.346        | 0.954 | 53.6 $\pm$ 6.9 <sup>b</sup>                    | 0.435 | 0.330        | <b>0.004</b>     |
|                            | LM | 54.4 $\pm$ 9.7                                  |              | 0.421            | 54.0 $\pm$ 6.7                                   |              | 0.875            | 53.9 $\pm$ 8.4                                  |              | 0.796 | 51.3 $\pm$ 5.1                               |              | 0.350 | <b>55.2 <math>\pm</math> 7.1<sup>*</sup></b>   |       | <b>0.031</b> | 0.476            |
| 30 min                     | HM | <b>53.2 <math>\pm</math> 6.0<sup>***</sup></b>  | 0.597        |                  | <b>51.3 <math>\pm</math> 4.5<sup>*</sup></b>     | 0.122        |                  | 52.6 $\pm$ 4.7                                  | 0.650        |       | 52.2 $\pm$ 4.1                               | 0.877        |       | 51.9 $\pm$ 5.0                                 | 0.643 |              | 0.732            |
|                            | LM | 52.2 $\pm$ 5.7                                  |              |                  | 53.7 $\pm$ 6.0                                   |              |                  | 53.4 $\pm$ 6.2                                  |              |       | 51.9 $\pm$ 6.4                               |              |       | <b>51.2 <math>\pm</math> 4.5<sup>*</sup></b>   |       |              | 0.589            |
| RP ALH ( $\mu\text{m}$ )   |    |                                                 |              |                  |                                                  |              |                  |                                                 |              |       |                                              |              |       |                                                |       |              |                  |
| 5 min                      | HM | <b>3.0 <math>\pm</math> 0.7<sup>***a</sup></b>  | 0.416        | <b>&lt;0.001</b> | <b>3.4 <math>\pm</math> 0.7<sup>***b</sup></b>   | 0.734        | <b>&lt;0.001</b> | 3.9 $\pm$ 0.9 <sup>ab</sup>                     | <b>0.014</b> | 0.981 | 3.9 $\pm$ 0.7 <sup>b</sup>                   | 0.817        | 0.712 | 3.8 $\pm$ 0.8 <sup>ab</sup>                    | 0.078 | <b>0.021</b> | <b>&lt;0.001</b> |
|                            | LM | 3.2 $\pm$ 0.8 <sup>b</sup>                      |              | 0.133            | 3.6 $\pm$ 0.9 <sup>ab</sup>                      |              | 0.847            | <b>3.4 <math>\pm</math> 0.6<sup>***ab</sup></b> |              | 0.144 | 3.9 $\pm$ 0.8 <sup>b</sup>                   |              | 0.645 | <b>3.4 <math>\pm</math> 0.6<sup>***b</sup></b> |       | <b>0.005</b> | <b>0.031</b>     |
| 30 min                     | HM | <b>3.9 <math>\pm</math> 0.8<sup>***</sup></b>   | 0.018        |                  | <b>4.1 <math>\pm</math> 0.7<sup>***</sup></b>    | 0.007        |                  | 3.9 $\pm$ 0.7                                   | 0.253        |       | 4.0 $\pm$ 0.6                                | 0.060        |       | <b>4.2 <math>\pm</math> 0.6<sup>***</sup></b>  | 0.005 |              | 0.311            |
|                            | LM | <b>3.4 <math>\pm</math> 0.4<sup>*</sup></b>     |              |                  | <b>3.5 <math>\pm</math> 0.8<sup>***</sup></b>    |              |                  | 3.7 $\pm$ 0.8                                   |              |       | 3.8 $\pm$ 0.9                                |              |       | <b>3.9 <math>\pm</math> 0.7<sup>***</sup></b>  |       |              | 0.152            |
| RP BCF (Hz)                |    |                                                 |              |                  |                                                  |              |                  |                                                 |              |       |                                              |              |       |                                                |       |              |                  |
| 5 min                      | HM | <b>26.0 <math>\pm</math> 3.4<sup>***</sup></b>  | 0.500        | <b>&lt;0.001</b> | 24.7 $\pm$ 4.7                                   | 0.307        | 0.055            | 23.5 $\pm$ 4.6                                  | 0.911        | 0.235 | 23.3 $\pm$ 4.1                               | 0.327        | 0.265 | <b>24.2 <math>\pm</math> 3.8<sup>***</sup></b> | 0.610 | <b>0.009</b> | 0.153            |
|                            | LM | <b>25.1 <math>\pm</math> 5.5<sup>*</sup></b>    |              | <b>0.039</b>     | 23.4 $\pm$ 4.6                                   |              | 1                | 23.3 $\pm$ 3.4                                  |              | 0.161 | 23.4 $\pm$ 3.3                               |              | 0.116 | <b>24.8 <math>\pm</math> 4.6<sup>*</sup></b>   |       | <b>0.046</b> | 0.486            |
| 30 min                     | HM | <b>21.8 <math>\pm</math> 4.3<sup>***</sup></b>  | 0.950        |                  | 22.6 $\pm$ 2.9                                   | 0.453        |                  | 22.1 $\pm$ 2.9                                  | 0.756        |       | 21.9 $\pm$ 3.7                               | 0.882        |       | <b>21.5 <math>\pm</math> 3.1<sup>***</sup></b> | 0.406 |              | 0.855            |
|                            | LM | <b>21.7 <math>\pm</math> 3.5<sup>*</sup></b>    |              |                  | 23.4 $\pm$ 4.3                                   |              |                  | 21.8 $\pm$ 3.9                                  |              |       | 21.8 $\pm$ 2.7                               |              |       | <b>22.3 <math>\pm</math> 3.4<sup>*</sup></b>   |       |              | 0.531            |

ALH, average path velocity; BCF, beat cross frequency; CI, confidence interval; CAP, capacitating-HTF; DOPA; dopamine; HTF, human tubal fluid; HM, high motile subpopulation; LIN, linearity; LM, low motile subpopulation; MP, medium-progressive; min, minutes; NP, non-progressive; Prog, progressive; RP, rapid-progressive; SD, standard deviation; SP *p*, t-test between subpopulations; STR, straightness; TP *p*, t test between time points; VAP, average path velocity; VCL, curvilinear velocity; VSL, straight-line velocity; WOB, wobble. Values labelled in bold with an asterisks in the same column were significantly different between the HM and LM subpopulations for individual media and SCA parameters (\**p* < 0.05, \*\**p* < 0.01 and \*\*\**p* < 0.001). Values labelled in bold and red with an asterisks in the same column were significantly different between the 5 and 30 minutes for individual subpopulations and media (\**p* < 0.05 and \*\**p* < 0.01). Student's t-test was used or the Mann-Whitney test when normal distribution was absent. <sup>a, b, c, d</sup> Values labelled with different superscript letters in the same row were significantly different between the various media for individual subpopulations and SCA parameters. One-way ANOVA was used for parametric distributions or Kruskal-Wallis test for non-parametric distributions.

**Supplementary Table S3.** Comparison of mean SCA motility and kinematic parameters at 5, 30 and 60 minutes for both the low motile (LM) and high motile (HM) sperm subpopulations after treatment with HTF, CAP, 50 ng/mL, 100 ng/mL, 250 ng/mL and 500 ng/mL prolactin (mean  $\pm$  SD) (n = 20).

|            |    | HTF                             |        |       |  | CAP                              |        |       |  | 50 ng/mL PRL                     |        |       |  | 100 ng/mL PRL                   |        |       |  | 250 ng/mL PRL                   |        |       |  | 500 ng/mL PRL                    |        |       |  | ANOVA |
|------------|----|---------------------------------|--------|-------|--|----------------------------------|--------|-------|--|----------------------------------|--------|-------|--|---------------------------------|--------|-------|--|---------------------------------|--------|-------|--|----------------------------------|--------|-------|--|-------|
|            |    | Mean $\pm$ SD                   | SP p   | TP p  |  | Mean $\pm$ SD                    | SP p   | TP p  |  | Mean $\pm$ SD                    | SP p   | TP p  |  | Mean $\pm$ SD                   | SP p   | TP p  |  | Mean $\pm$ SD                   | SP p   | TP p  |  | Mean $\pm$ SD                    | SP p   | TP p  |  |       |
| Prog (%)   |    |                                 |        |       |  |                                  |        |       |  |                                  |        |       |  |                                 |        |       |  |                                 |        |       |  |                                  |        |       |  |       |
| 5 min      | HM | 33.3 $\pm$ 21.1 <sup>***</sup>  | <0.001 | 0.184 |  | 42.2 $\pm$ 21.5 <sup>***</sup>   | <0.001 | 0.515 |  | 39.5 $\pm$ 20.3 <sup>**</sup>    | 0.002  | 0.625 |  | 36.9 $\pm$ 19.7 <sup>*</sup>    | 0.011  | 0.710 |  | 38.2 $\pm$ 19.1 <sup>**</sup>   | 0.001  | 0.801 |  | 36.3 $\pm$ 21.4 <sup>***</sup>   | <0.001 | 0.524 |  | 0.757 |
|            | LM | 10.0 $\pm$ 9.8 <sup>***a</sup>  |        | 0.542 |  | 15.0 $\pm$ 11.8 <sup>***ab</sup> |        | 0.641 |  | 22.7 $\pm$ 14.1 <sup>***b</sup>  |        | 0.779 |  | 23.4 $\pm$ 15.3 <sup>b</sup>    |        | 0.435 |  | 20.9 $\pm$ 15.4 <sup>***b</sup> |        | 0.752 |  | 17.9 $\pm$ 13.6 <sup>***ab</sup> |        | 0.711 |  | 0.005 |
| 30 min     | HM | 27.7 $\pm$ 19.5 <sup>***</sup>  | <0.001 |       |  | 37.0 $\pm$ 22.2 <sup>**</sup>    | 0.008  |       |  | 37.5 $\pm$ 19.1 <sup>**</sup>    | 0.003  |       |  | 32.6 $\pm$ 19.3                 | 0.241  |       |  | 34.6 $\pm$ 20.6                 | 0.054  |       |  | 34.5 $\pm$ 23.2 <sup>**</sup>    | 0.002  |       |  | 0.636 |
|            | LM | 9.4 $\pm$ 9.7 <sup>***a</sup>   |        |       |  | 19.0 $\pm$ 17.4 <sup>**ab</sup>  |        |       |  | 21.5 $\pm$ 19.5 <sup>**ab</sup>  |        |       |  | 25.9 $\pm$ 19.9 <sup>b</sup>    |        |       |  | 23.3 $\pm$ 20.4 <sup>b</sup>    |        |       |  | 16.3 $\pm$ 13.9 <sup>**ab</sup>  |        |       |  | 0.024 |
| 60 min     | HM | 22.1 $\pm$ 17.7 <sup>**</sup>   | 0.002  |       |  | 34.8 $\pm$ 21.7 <sup>**</sup>    | 0.004  |       |  | 34.0 $\pm$ 15.0 <sup>**</sup>    | 0.006  |       |  | 33.3 $\pm$ 17.0 <sup>**</sup>   | 0.009  |       |  | 35.9 $\pm$ 15.6 <sup>**</sup>   | 0.003  |       |  | 29.1 $\pm$ 18.0 <sup>*</sup>     | 0.011  |       |  | 0.155 |
|            | LM | 7.0 $\pm$ 8.2 <sup>***a</sup>   |        |       |  | 16.8 $\pm$ 13.1 <sup>***ab</sup> |        |       |  | 19.2 $\pm$ 13.2 <sup>***ab</sup> |        |       |  | 19.2 $\pm$ 14.6 <sup>***b</sup> |        |       |  | 19.3 $\pm$ 16.6 <sup>**ab</sup> |        |       |  | 14.4 $\pm$ 14.7 <sup>ab</sup>    |        |       |  | 0.044 |
| Motile (%) |    |                                 |        |       |  |                                  |        |       |  |                                  |        |       |  |                                 |        |       |  |                                 |        |       |  |                                  |        |       |  |       |
| 5 min      | HM | 61.5 $\pm$ 23.5 <sup>***</sup>  | <0.001 | 0.128 |  | 68.7 $\pm$ 22.0 <sup>***</sup>   | <0.001 | 0.952 |  | 67.4 $\pm$ 21.1 <sup>***</sup>   | <0.001 | 0.842 |  | 65.9 $\pm$ 22.4 <sup>**</sup>   | 0.001  | 0.998 |  | 68.7 $\pm$ 21.6 <sup>***</sup>  | <0.001 | 0.613 |  | 65.2 $\pm$ 22.2 <sup>***</sup>   | <0.001 | 0.655 |  | 0.873 |
|            | LM | 28.8 $\pm$ 19.5 <sup>***</sup>  |        | 0.364 |  | 39.1 $\pm$ 19.8 <sup>***</sup>   |        | 0.822 |  | 42.7 $\pm$ 19.4 <sup>***</sup>   |        | 0.738 |  | 44.5 $\pm$ 20.6 <sup>**</sup>   |        | 0.370 |  | 40.8 $\pm$ 20.2 <sup>***</sup>  |        | 0.783 |  | 36.2 $\pm$ 15.7 <sup>***</sup>   |        | 0.541 |  | 0.077 |
| 30 min     | HM | 56.0 $\pm$ 23.7 <sup>***</sup>  | <0.001 |       |  | 67.1 $\pm$ 21.9 <sup>***</sup>   | <0.001 |       |  | 66.0 $\pm$ 22.4 <sup>***</sup>   | <0.001 |       |  | 66.3 $\pm$ 20.9 <sup>***</sup>  | <0.001 |       |  | 63.0 $\pm$ 24.6 <sup>**</sup>   | 0.002  |       |  | 66.8 $\pm$ 23.8 <sup>***</sup>   | <0.001 |       |  | 0.544 |
|            | LM | 26.2 $\pm$ 18.8 <sup>***</sup>  |        |       |  | 38.1 $\pm$ 20.8 <sup>***</sup>   |        |       |  | 38.3 $\pm$ 21.1 <sup>***</sup>   |        |       |  | 43.3 $\pm$ 21.5 <sup>***</sup>  |        |       |  | 40.9 $\pm$ 20.5 <sup>***</sup>  |        |       |  | 38.1 $\pm$ 15.6 <sup>***</sup>   |        |       |  | 0.072 |
| 60 min     | HM | 47.2 $\pm$ 20.1 <sup>***a</sup> | <0.001 |       |  | 66.9 $\pm$ 20.3 <sup>***b</sup>  | <0.001 |       |  | 63.8 $\pm$ 16.6 <sup>***b</sup>  | <0.001 |       |  | 66.3 $\pm$ 18.9 <sup>***b</sup> | <0.001 |       |  | 63.2 $\pm$ 19.4 <sup>***b</sup> | <0.001 |       |  | 59.2 $\pm$ 20.7 <sup>***ab</sup> | <0.001 |       |  | 0.024 |
|            | LM | 20.7 $\pm$ 17.3 <sup>***a</sup> |        |       |  | 35.4 $\pm$ 18.6 <sup>***b</sup>  |        |       |  | 40.0 $\pm$ 16.7 <sup>***b</sup>  |        |       |  | 36.5 $\pm$ 15.2 <sup>***b</sup> |        |       |  | 37.2 $\pm$ 16.3 <sup>***b</sup> |        |       |  | 32.8 $\pm$ 15.2 <sup>***b</sup>  |        |       |  | 0.010 |
| RP (%)     |    |                                 |        |       |  |                                  |        |       |  |                                  |        |       |  |                                 |        |       |  |                                 |        |       |  |                                  |        |       |  |       |
| 5 min      | HM | 9.8 $\pm$ 10.4 <sup>**</sup>    | 0.004  | 0.626 |  | 11.5 $\pm$ 14.8                  | 0.133  | 0.999 |  | 11.8 $\pm$ 12.3 <sup>*</sup>     | 0.033  | 0.962 |  | 9.3 $\pm$ 11.2                  | 0.144  | 0.911 |  | 11.1 $\pm$ 11.6 <sup>*</sup>    | 0.027  | 0.870 |  | 10.3 $\pm$ 12.8                  | 0.169  | 0.869 |  | 0.979 |
|            | LM | 2.2 $\pm$ 3.7 <sup>**</sup>     |        | 0.994 |  | 4.3 $\pm$ 6.0                    |        | 0.861 |  | 4.3 $\pm$ 5.0 <sup>*</sup>       |        | 0.370 |  | 4.8 $\pm$ 7.1                   |        | 0.467 |  | 5.6 $\pm$ 9.3 <sup>*</sup>      |        | 0.788 |  | 4.5 $\pm$ 5.9                    |        | 0.845 |  | 0.775 |
| 30 min     | HM | 7.8 $\pm$ 9.4                   | 0.065  |       |  | 11.6 $\pm$ 14.4                  | 0.142  |       |  | 12.8 $\pm$ 13.5                  | 0.155  |       |  | 10.5 $\pm$ 12.8                 | 0.369  |       |  | 12.6 $\pm$ 13.5                 | 0.139  |       |  | 12.1 $\pm$ 13.0 <sup>*</sup>     | 0.023  |       |  | 0.782 |
|            | LM | 2.1 $\pm$ 3.2                   |        |       |  | 5.4 $\pm$ 8.5                    |        |       |  | 7.3 $\pm$ 11.6                   |        |       |  | 7.6 $\pm$ 10.7                  |        |       |  | 7.5 $\pm$ 11.2                  |        |       |  | 4.1 $\pm$ 6.2 <sup>*</sup>       |        |       |  | 0.596 |
| 60 min     | HM | 7.2 $\pm$ 8.2                   | 0.115  |       |  | 11.6 $\pm$ 14.5                  | 0.335  |       |  | 11.9 $\pm$ 13.9                  | 0.606  |       |  | 9.1 $\pm$ 10.2                  | 0.091  |       |  | 10.9 $\pm$ 10.3 <sup>*</sup>    | 0.049  |       |  | 10.4 $\pm$ 12.6                  | 0.118  |       |  | 0.874 |
|            | LM | 2.1 $\pm$ 2.9                   |        |       |  | 5.4 $\pm$ 7.3                    |        |       |  | 7.8 $\pm$ 9.2                    |        |       |  | 4.8 $\pm$ 7.5                   |        |       |  | 6.1 $\pm$ 8.2 <sup>*</sup>      |        |       |  | 5.4 $\pm$ 10.6                   |        |       |  | 0.489 |
| MP (%)     |    |                                 |        |       |  |                                  |        |       |  |                                  |        |       |  |                                 |        |       |  |                                 |        |       |  |                                  |        |       |  |       |
| 5 min      | HM | 23.5 $\pm$ 15.3 <sup>***</sup>  | <0.001 | 0.128 |  | 30.7 $\pm$ 14.6 <sup>***</sup>   | <0.001 | 0.192 |  | 27.7 $\pm$ 13.8 <sup>*</sup>     | 0.019  | 0.312 |  | 27.5 $\pm$ 14.5 <sup>*</sup>    | 0.021  | 0.381 |  | 25.7 $\pm$ 11.7 <sup>**</sup>   | 0.004  | 0.521 |  | 25.9 $\pm$ 12.0 <sup>***</sup>   | <0.001 | 0.138 |  | 0.577 |
|            | LM | 7.8 $\pm$ 9.2 <sup>***a</sup>   |        | 0.447 |  | 10.7 $\pm$ 10.3 <sup>***ab</sup> |        | 0.617 |  | 18.4 $\pm$ 12.8 <sup>b</sup>     |        | 0.253 |  | 18.6 $\pm$ 12.2 <sup>b</sup>    |        | 0.539 |  | 15.3 $\pm$ 11.7 <sup>**ab</sup> |        | 0.766 |  | 13.4 $\pm$ 12.2 <sup>***ab</sup> |        | 0.425 |  | 0.007 |
| 30 min     | HM | 19.9 $\pm$ 12.2 <sup>***</sup>  | <0.001 |       |  | 25.4 $\pm$ 14.4 <sup>**</sup>    | 0.005  |       |  | 24.3 $\pm$ 11.2 <sup>**</sup>    | 0.003  |       |  | 22.2 $\pm$ 12.2                 | 0.330  |       |  | 22.0 $\pm$ 12.0                 | 0.101  |       |  | 22.4 $\pm$ 13.2 <sup>**</sup>    | 0.008  |       |  | 0.748 |
|            | LM | 7.3 $\pm$ 7.8 <sup>***</sup>    |        |       |  | 13.6 $\pm$ 12.7 <sup>**</sup>    |        |       |  | 14.2 $\pm$ 12.1 <sup>**</sup>    |        |       |  | 18.3 $\pm$ 14.8                 |        |       |  | 15.9 $\pm$ 13.3                 |        |       |  | 12.2 $\pm$ 10.9 <sup>**</sup>    |        |       |  | 0.057 |
| 60 min     | HM | 14.9 $\pm$ 12.8 <sup>**</sup>   | 0.002  |       |  | 23.2 $\pm$ 12.6 <sup>**</sup>    | 0.001  |       |  | 22.1 $\pm$ 11.0 <sup>**</sup>    | 0.002  |       |  | 24.2 $\pm$ 13.4 <sup>*</sup>    | 0.025  |       |  | 25.0 $\pm$ 11.3 <sup>**</sup>   | 0.003  |       |  | 18.7 $\pm$ 8.3 <sup>**</sup>     | 0.004  |       |  | 0.075 |
|            | LM | 4.9 $\pm$ 5.9 <sup>**</sup>     |        |       |  | 11.4 $\pm$ 7.5 <sup>**</sup>     |        |       |  | 11.4 $\pm$ 7.9 <sup>**</sup>     |        |       |  | 14.3 $\pm$ 13.8 <sup>*</sup>    |        |       |  | 13.2 $\pm$ 11.2 <sup>**</sup>   |        |       |  | 8.9 $\pm$ 10.6 <sup>**</sup>     |        |       |  | 0.055 |
| NP (%)     |    |                                 |        |       |  |                                  |        |       |  |                                  |        |       |  |                                 |        |       |  |                                 |        |       |  |                                  |        |       |  |       |
| 5 min      | HM | 28.2 $\pm$ 19.1 <sup>*</sup>    | 0.048  | 0.793 |  | 26.5 $\pm$ 20.9                  | 0.805  | 0.602 |  | 27.9 $\pm$ 16.1                  | 0.084  | 0.950 |  | 29.1 $\pm$ 19.2                 | 0.146  | 0.716 |  | 30.6 $\pm$ 21.1                 | 0.108  | 0.869 |  | 29.0 $\pm$ 19.6                  | 0.087  | 0.885 |  | 0.988 |
|            | LM | 18.8 $\pm$ 15.2 <sup>*</sup>    |        | 0.481 |  | 24.1 $\pm$ 17.7                  |        | 0.461 |  | 20.0 $\pm$ 14.7                  |        | 0.619 |  | 21.1 $\pm$ 15.4                 |        | 0.551 |  | 19.8 $\pm$ 12.3                 |        | 0.801 |  | 18.3 $\pm$ 13.6                  |        | 0.617 |  | 0.807 |
| 30 min     | HM | 28.3 $\pm$ 16.0 <sup>**</sup>   | 0.007  |       |  | 30.1 $\pm$ 18.2                  | 0.053  |       |  | 28.5 $\pm$ 19.7 <sup>*</sup>     | 0.026  |       |  | 33.7 $\pm$ 23.6 <sup>*</sup>    | 0.014  |       |  | 28.4 $\pm$ 23.2                 | 0.149  |       |  | 32.2 $\pm$ 27.0                  | 0.327  |       |  | 0.950 |
|            | LM | 16.8 $\pm$ 13.3 <sup>**</sup>   |        |       |  | 19.9 $\pm$ 12.5                  |        |       |  | 16.9 $\pm$ 14.5 <sup>*</sup>     |        |       |  | 17.4 $\pm$ 13.1 <sup>*</sup>    |        |       |  | 17.5 $\pm$ 13.7                 |        |       |  | 21.8 $\pm$ 15.7                  |        |       |  | 0.766 |
| 60 min     | HM | 25.1 $\pm$ 15.6 <sup>*</sup>    | 0.014  |       |  | 32.1 $\pm$ 15.2 <sup>**</sup>    | 0.004  |       |  | 29.7 $\pm$ 20.5                  | 0.300  |       |  | 33.0 $\pm$ 19.0 <sup>**</sup>   | 0.003  |       |  | 27.3 $\pm$ 17.3                 | 0.062  |       |  | 30.1 $\pm$ 21.3 <sup>*</sup>     | 0.049  |       |  | 0.780 |
|            | LM | 13.7 $\pm$ 11.7 <sup>*</sup>    |        |       |  | 18.6 $\pm$ 14.4 <sup>**</sup>    |        |       |  | 20.8 $\pm$ 13.3                  |        |       |  | 17.3 $\pm$ 10.1 <sup>**</sup>   |        |       |  | 17.9 $\pm$ 12.6                 |        |       |  | 18.5 $\pm$ 10.9 <sup>*</sup>     |        |       |  | 0.631 |
| Rapid (%)  |    |                                 |        |       |  |                                  |        |       |  |                                  |        |       |  |                                 |        |       |  |                                 |        |       |  |                                  |        |       |  |       |
| 5 min      | HM | 15.9 $\pm$ 18.0 <sup>*</sup>    | 0.025  | 0.570 |  | 21.1 $\pm$ 24.2                  | 0.152  | 0.943 |  | 20.4 $\pm$ 21.2                  | 0.060  | 0.725 |  | 16.9 $\pm$ 20.5                 | 0.485  | 0.863 |  | 21.0 $\pm$ 23.9 <sup>*</sup>    | 0.020  | 0.752 |  | 19.5 $\pm$ 26.0                  | 0.416  | 0.769 |  | 0.946 |
|            | LM | 4.7 $\pm$ 6.2 <sup>*</sup>      |        | 0.804 |  | 7.4 $\pm$ 8.5                    |        | 0.870 |  | 10.0 $\pm$ 12.9                  |        | 0.935 |  | 11.5 $\pm$ 15.0                 |        | 0.513 |  | 9.0 $\pm$ 12.8 <sup>*</sup>     |        | 0.718 |  | 8.8 $\pm$ 10.1                   |        | 0.990 |  | 0.694 |
| 30 min     | HM | 13.5 $\pm$ 15.6 <sup>*</sup>    | 0.029  |       |  | 19.8 $\pm$ 25.9                  | 0.172  |       |  | 21.8 $\pm$ 21.9                  | 0.118  |       |  | 17.3 $\pm$ 21.7                 | 0.707  |       |  | 20.4 $\pm$ 20.1                 | 0.090  |       |  | 20.3 $\pm$ 23.6                  | 0.159  |       |  | 0.816 |
|            | LM | 4.4 $\pm$ 6.9 <sup>*</sup>      |        |       |  | 9.0 $\pm$ 13.4                   |        |       |  | 11.4 $\pm$ 15.7                  |        |       |  | 13.4 $\pm$ 16.9                 |        |       |  | 12.1 $\pm$ 16.9                 |        |       |  | 8.8 $\pm$ 9.8                    |        |       |  | 0.390 |
| 60 min     | HM | 10.8 $\pm$ 12.2                 | 0.063  |       |  | 18.6 $\pm$ 22.6                  | 0.104  |       |  | 16.7 $\pm$ 19.1                  | 0.403  |       |  | 14.1 $\pm$ 18.1                 | 0.425  |       |  | 16.4 $\pm$ 18.6                 | 0.166  |       |  | 15.3 $\pm$ 20.2                  | 0.217  |       |  | 0.856 |
|            | LM | 3.5 $\pm$ 4.4                   |        |       |  | 7.6 $\pm$ 11.0                   |        |       |  | 10.5 $\pm$ 13.0                  |        |       |  | 8.2 $\pm$ 10.8                  |        |       |  | 9.6 $\pm$ 11.1                  |        |       |  | 9.2 $\pm$ 13.1                   |        |       |  | 0.626 |

Supplementary Table S3. Continued...

| Medium (%)        |    |                             |        |       |                            |       |       |                             |       |       |                            |       |       |                            |       |       |                            |       |       |        |  |  |  |  |  |  |  |  |  |
|-------------------|----|-----------------------------|--------|-------|----------------------------|-------|-------|-----------------------------|-------|-------|----------------------------|-------|-------|----------------------------|-------|-------|----------------------------|-------|-------|--------|--|--|--|--|--|--|--|--|--|
| 5 min             | HM | 22.9 ± 16.5 <sup>***</sup>  | <0.001 | 0.279 | 27.1 ± 20.2 <sup>**</sup>  | 0.005 | 0.850 | 26.4 ± 19.0                 | 0.064 | 0.798 | 27.2 ± 20.5                | 0.065 | 0.546 | 24.2 ± 17.8                | 0.108 | 0.651 | 23.5 ± 17.1 <sup>†</sup>   | 0.018 | 0.745 | 0.937  |  |  |  |  |  |  |  |  |  |
|                   | LM | 8.0 ± 9.7 <sup>**</sup>     |        | 0.574 | 11.3 ± 11.5 <sup>**</sup>  |       | 0.784 | 16.4 ± 15.4                 |       | 0.780 | 15.8 ± 13.9                |       | 0.865 | 15.4 ± 14.5                |       | 0.704 | 12.2 ± 11.3 <sup>†</sup>   |       | 0.267 | 0.177  |  |  |  |  |  |  |  |  |  |
| 30 min            | HM | 19.8 ± 13.3 <sup>***</sup>  | <0.001 |       | 24.0 ± 19.8                | 0.072 |       | 22.9 ± 19.0                 | 0.110 |       | 21.5 ± 16.7                | 0.194 |       | 23.0 ± 19.1                | 0.170 |       | 20.3 ± 15.5 <sup>†</sup>   | 0.041 |       | 0.998  |  |  |  |  |  |  |  |  |  |
|                   | LM | 6.7 ± 8.0 <sup>**</sup>     |        |       | 13.5 ± 14.0                |       |       | 14.3 ± 12.8                 |       |       | 15.7 ± 14.5                |       |       | 15.8 ± 15.4                |       |       | 12.5 ± 9.4 <sup>†</sup>    |       |       | 0.121  |  |  |  |  |  |  |  |  |  |
| 60 min            | HM | 15.6 ± 13.8 <sup>***</sup>  | <0.001 |       | 25.1 ± 15.6 <sup>**</sup>  | 0.008 |       | 23.6 ± 16.8 <sup>†</sup>    | 0.038 |       | 26.1 ± 19.1 <sup>†</sup>   | 0.017 |       | 28.3 ± 20.9 <sup>**</sup>  | 0.007 |       | 20.6 ± 13.5 <sup>**</sup>  | 0.001 |       | 0.239  |  |  |  |  |  |  |  |  |  |
|                   | LM | 5.2 ± 8.6 <sup>***a</sup>   |        |       | 13.3 ± 9.5 <sup>**b</sup>  |       |       | 13.8 ± 10.8 <sup>**b</sup>  |       |       | 13.6 ± 15.6 <sup>†ab</sup> |       |       | 12.4 ± 12.1 <sup>**b</sup> |       |       | 8.0 ± 8.1 <sup>**ab</sup>  |       |       | 0.05   |  |  |  |  |  |  |  |  |  |
| Slow (%)          |    |                             |        |       |                            |       |       |                             |       |       |                            |       |       |                            |       |       |                            |       |       |        |  |  |  |  |  |  |  |  |  |
| 5 min             | HM | 22.7 ± 16.7                 | 0.083  | 0.896 | 20.5 ± 17.0                | 0.926 | 0.776 | 20.7 ± 13.5                 | 0.298 | 0.857 | 21.9 ± 15.4                | 0.224 | 0.559 | 23.5 ± 16.9                | 0.080 | 0.572 | 22.2 ± 15.1                | 0.076 | 0.761 | 0.985  |  |  |  |  |  |  |  |  |  |
|                   | LM | 16.1 ± 13.2                 |        | 0.515 | 20.4 ± 16.0                |       | 0.311 | 16.3 ± 12.2                 |       | 0.618 | 17.2 ± 13.5                |       | 0.617 | 16.4 ± 9.7                 |       | 0.515 | 15.2 ± 11.3                |       | 0.875 | 0.792  |  |  |  |  |  |  |  |  |  |
| 30 min            | HM | 22.7 ± 13.8 <sup>†</sup>    | 0.047  |       | 23.2 ± 15.0                | 0.056 |       | 21.3 ± 17.9                 | 0.083 |       | 27.5 ± 21.5 <sup>†</sup>   | 0.019 |       | 19.6 ± 18.4                | 0.415 |       | 26.2 ± 23.0                | 0.261 |       | 0.676  |  |  |  |  |  |  |  |  |  |
|                   | LM | 15.2 ± 12.3 <sup>†</sup>    |        |       | 15.6 ± 11.8                |       |       | 13.0 ± 11.5                 |       |       | 14.1 ± 10.4 <sup>†</sup>   |       |       | 12.9 ± 10.2                |       |       | 16.8 ± 12.6                |       |       | 0.827  |  |  |  |  |  |  |  |  |  |
| 60 min            | HM | 20.8 ± 13.7 <sup>†</sup>    | 0.037  |       | 23.2 ± 12.4 <sup>†</sup>   | 0.029 |       | 23.4 ± 17.9                 | 0.108 |       | 26.0 ± 18.1 <sup>†</sup>   | 0.019 |       | 18.5 ± 13.2                | 0.422 |       | 23.3 ± 18.7                | 0.405 |       | 0.772  |  |  |  |  |  |  |  |  |  |
|                   | LM | 12.0 ± 9.3 <sup>†</sup>     |        |       | 14.4 ± 12.4 <sup>†</sup>   |       |       | 15.8 ± 13.2                 |       |       | 14.6 ± 9.0 <sup>†</sup>    |       |       | 15.2 ± 11.6                |       |       | 15.6 ± 9.2                 |       |       | 0.912  |  |  |  |  |  |  |  |  |  |
| Motile VCL (μm/s) |    |                             |        |       |                            |       |       |                             |       |       |                            |       |       |                            |       |       |                            |       |       |        |  |  |  |  |  |  |  |  |  |
| 5 min             | HM | 111.8 ± 17.3                | 0.086  | 0.825 | 124.5 ± 22.1               | 0.144 | 0.998 | 125.2 ± 20.5                | 0.533 | 0.182 | 122.6 ± 22.0               | 0.920 | 0.899 | 125.9 ± 22.2 <sup>†</sup>  | 0.026 | 0.638 | 126.1 ± 26.0               | 0.196 | 0.674 | 0.189  |  |  |  |  |  |  |  |  |  |
|                   | LM | 102.4 ± 19.6                |        | 0.243 | 113.7 ± 28.0               |       | 0.923 | 121.0 ± 26.3                |       | 0.607 | 121.9 ± 26.7               |       | 0.885 | 111.4 ± 21.4 <sup>†</sup>  |       | 0.546 | 116.7 ± 23.6               |       | 0.974 | 0.074  |  |  |  |  |  |  |  |  |  |
| 30 min            | HM | 108.8 ± 17.8 <sup>**a</sup> | 0.007  |       | 124.8 ± 23.7 <sup>b</sup>  | 0.148 |       | 135.6 ± 20.2 <sup>**b</sup> | 0.002 |       | 121.3 ± 20.1 <sup>b</sup>  | 0.812 |       | 132.0 ± 22.7 <sup>b</sup>  | 0.040 |       | 127.2 ± 22.4 <sup>b</sup>  | 0.164 |       | 0.001  |  |  |  |  |  |  |  |  |  |
|                   | LM | 92.8 ± 20.3 <sup>**a</sup>  |        |       | 114.9 ± 21.6 <sup>b</sup>  |       |       | 118.1 ± 16.9 <sup>**b</sup> |       |       | 119.6 ± 30.5 <sup>b</sup>  |       |       | 118.6 ± 21.1 <sup>†b</sup> |       |       | 116.5 ± 29.5 <sup>b</sup>  |       |       | 0.001  |  |  |  |  |  |  |  |  |  |
| 60 min            | HM | 111.2 ± 17.9 <sup>†a</sup>  | 0.017  |       | 125.0 ± 20.4 <sup>ab</sup> | 0.052 |       | 130.7 ± 15.7 <sup>b</sup>   | 0.429 |       | 124.2 ± 17.9 <sup>ab</sup> | 0.440 |       | 130.7 ± 25.6 <sup>b</sup>  | 0.054 |       | 121.1 ± 20.5 <sup>ab</sup> | 0.476 |       | 0.034  |  |  |  |  |  |  |  |  |  |
|                   | LM | 97.7 ± 17.5 <sup>†</sup>    |        |       | 111.9 ± 22.3               |       |       | 125.2 ± 25.7                |       |       | 117.3 ± 34.2               |       |       | 113.8 ± 26.7               |       |       | 114.8 ± 31.9               |       |       | 0.092  |  |  |  |  |  |  |  |  |  |
| Motile VAP (μm/s) |    |                             |        |       |                            |       |       |                             |       |       |                            |       |       |                            |       |       |                            |       |       |        |  |  |  |  |  |  |  |  |  |
| 5 min             | HM | 57.6 ± 9.0                  | 0.067  | 0.661 | 60.1 ± 10.4                | 0.343 | 0.855 | 61.2 ± 9.6                  | 0.217 | 0.535 | 59.2 ± 9.9                 | 0.691 | 0.791 | 60.0 ± 8.6 <sup>†</sup>    | 0.017 | 0.370 | 59.5 ± 10.2                | 0.167 | 0.991 | 0.872  |  |  |  |  |  |  |  |  |  |
|                   | LM | 52.8 ± 8.7                  |        | 0.199 | 55.3 ± 10.6                |       | 0.798 | 58.0 ± 7.8                  |       | 0.280 | 58.1 ± 10.0                |       | 0.863 | 54.2 ± 7.8 <sup>†</sup>    |       | 0.163 | 56.4 ± 9.3                 |       | 0.856 | 0.275  |  |  |  |  |  |  |  |  |  |
| 30 min            | HM | 54.9 ± 11.1 <sup>†a</sup>   | 0.026  |       | 58.6 ± 10.0 <sup>ab</sup>  | 0.563 |       | 63.3 ± 8.1 <sup>b</sup>     | 0.073 |       | 58.0 ± 8.1 <sup>ab</sup>   | 0.535 |       | 63.6 ± 9.8 <sup>b</sup>    | 0.103 |       | 59.8 ± 8.5 <sup>ab</sup>   | 0.055 |       | 0.014  |  |  |  |  |  |  |  |  |  |
|                   | LM | 48.2 ± 8.3 <sup>†a</sup>    |        |       | 57.1 ± 8.2 <sup>b</sup>    |       |       | 59.3 ± 6.8 <sup>b</sup>     |       |       | 60.0 ± 13.4 <sup>b</sup>   |       |       | 59.2 ± 8.2 <sup>b</sup>    |       |       | 55.0 ± 11.6 <sup>b</sup>   |       |       | <0.001 |  |  |  |  |  |  |  |  |  |
| 60 min            | HM | 57.0 ± 12.1                 | 0.118  |       | 60.3 ± 11.8                | 0.362 |       | 64.0 ± 8.8                  | 0.502 |       | 59.9 ± 10.0                | 0.741 |       | 63.7 ± 11.5                | 0.148 |       | 59.4 ± 10.4                | 0.213 |       | 0.329  |  |  |  |  |  |  |  |  |  |
|                   | LM | 51.3 ± 9.3                  |        |       | 56.9 ± 10.7                |       |       | 62.9 ± 14.9                 |       |       | 58.5 ± 14.7                |       |       | 58.6 ± 12.8                |       |       | 54.5 ± 13.3                |       |       | 0.140  |  |  |  |  |  |  |  |  |  |
| Motile VSL (μm/s) |    |                             |        |       |                            |       |       |                             |       |       |                            |       |       |                            |       |       |                            |       |       |        |  |  |  |  |  |  |  |  |  |
| 5 min             | HM | 45.1 ± 11.9                 | 0.118  | 0.498 | 47.3 ± 11.0                | 0.248 | 0.690 | 48.1 ± 10.2                 | 0.094 | 0.681 | 46.0 ± 9.0                 | 0.223 | 0.690 | 46.7 ± 6.7 <sup>†</sup>    | 0.032 | 0.542 | 45.7 ± 9.7                 | 0.171 | 0.970 | 0.908  |  |  |  |  |  |  |  |  |  |
|                   | LM | 40.0 ± 10.3                 |        | 0.458 | 42.2 ± 10.3                |       | 0.690 | 43.3 ± 9.3                  |       | 0.270 | 43.1 ± 7.1                 |       | 0.416 | 41.8 ± 8.3 <sup>†</sup>    |       | 0.336 | 41.5 ± 11.2                |       | 0.547 | 0.854  |  |  |  |  |  |  |  |  |  |
| 30 min            | HM | 40.9 ± 12.9                 | 0.172  |       | 44.5 ± 9.6                 | 0.267 |       | 47.9 ± 8.2                  | 0.368 |       | 44.4 ± 8.4                 | 0.567 |       | 48.2 ± 11.6                | 0.494 |       | 45.5 ± 8.9 <sup>†</sup>    | 0.013 |       | 0.142  |  |  |  |  |  |  |  |  |  |
|                   | LM | 36.1 ± 10.0 <sup>†</sup>    |        |       | 42.6 ± 10.4 <sup>ab</sup>  |       |       | 45.6 ± 9.4 <sup>b</sup>     |       |       | 46.3 ± 13.8 <sup>b</sup>   |       |       | 46.0 ± 10.9 <sup>b</sup>   |       |       | 38.5 ± 9.9 <sup>†ab</sup>  |       |       | 0.004  |  |  |  |  |  |  |  |  |  |
| 60 min            | HM | 43.5 ± 11.7                 | 0.166  |       | 45.8 ± 11.9                | 0.682 |       | 50.3 ± 9.9                  | 0.431 |       | 46.7 ± 10.5                | 0.965 |       | 50.3 ± 11.1                | 0.338 |       | 46.2 ± 11.1 <sup>†</sup>   | 0.036 |       | 0.359  |  |  |  |  |  |  |  |  |  |
|                   | LM | 37.8 ± 11.0                 |        |       | 44.3 ± 10.3                |       |       | 49.1 ± 15.9                 |       |       | 43.1 ± 14.4                |       |       | 46.3 ± 14.3                |       |       | 38.8 ± 10.0 <sup>†</sup>   |       |       | 0.073  |  |  |  |  |  |  |  |  |  |



Supplementary Table S3. Continued...

| Motile STR (%)  |    |                                     |       |       |                         |       |       |                          |       |       |                                       |       |       |                         |       |       |                           |        |       |       |  |  |  |  |
|-----------------|----|-------------------------------------|-------|-------|-------------------------|-------|-------|--------------------------|-------|-------|---------------------------------------|-------|-------|-------------------------|-------|-------|---------------------------|--------|-------|-------|--|--|--|--|
| 5 min           | HM | 75.3 ± 10.9                         | 0.343 | 0.330 | 77.2 ± 7.9              | 0.147 | 0.180 | 76.8 ± 7.0               | 0.082 | 0.340 | 75.9 ± 6.9                            | 0.126 | 0.543 | 76.2 ± 6.4              | 0.306 | 0.524 | 74.6 ± 7.8                | 0.523  | 0.807 | 0.887 |  |  |  |  |
|                 | LM | 73.2 ± 11.9                         |       | 0.597 | 73.6 ± 8.7              |       | 0.642 | 72.5 ± 9.7               |       | 0.632 | 72.8 ± 6.8                            |       | 0.476 | 74.0 ± 8.2              |       | 0.761 | 71.9 ± 11.9               |        | 0.500 | 0.979 |  |  |  |  |
| 30 min          | HM | 70.8 ± 11.0                         | 0.921 |       | 73.7 ± 7.2              | 0.307 |       | 73.8 ± 7.5               | 0.370 |       | 73.7 ± 7.1                            | 0.974 |       | 74.0 ± 9.4              | 0.387 |       | 73.3 ± 6.8                | 0.070  |       | 0.784 |  |  |  |  |
|                 | LM | 70.4 ± 13.2                         |       |       | 71.7 ± 9.9              |       |       | 74.8 ± 9.8               |       |       | 73.8 ± 9.8                            |       |       | 75.8 ± 10.1             |       |       | 68.4 ± 11.2               |        |       | 0.150 |  |  |  |  |
| 60 min          | HM | 73.0 ± 8.0                          | 0.166 |       | 73.2 ± 8.2              | 0.770 |       | 75.8 ± 6.9               | 0.678 |       | 74.5 ± 6.2                            | 0.405 |       | 76.2 ± 6.2              | 0.917 |       | 74.3 ± 6.9                | 0.088  |       | 0.668 |  |  |  |  |
|                 | LM | 69.5 ± 11.2                         |       |       | 74.1 ± 7.3              |       |       | 74.8 ± 8.3               |       |       | 70.4 ± 10.6                           |       |       | 75.9 ± 11.1             |       |       | 68.9 ± 10.0               |        |       | 0.132 |  |  |  |  |
| Motile LIN (%)  |    |                                     |       |       |                         |       |       |                          |       |       |                                       |       |       |                         |       |       |                           |        |       |       |  |  |  |  |
| 5 min           | HM | 42.4 ± 11.2                         | 0.769 | 0.446 | 41.4 ± 10.6             | 0.574 | 0.357 | 40.9 ± 10.4              | 0.550 | 0.632 | 40.0 ± 7.4                            | 0.363 | 0.558 | 40.1 ± 7.1              | 0.724 | 0.758 | 38.8 ± 7.4                | 0.613  | 0.711 | 0.820 |  |  |  |  |
|                 | LM | 41.4 ± 11.0                         |       | 0.551 | 39.8 ± 8.3              |       | 0.892 | 38.2 ± 7.7               |       | 0.522 | 37.9 ± 8.2                            |       | 0.533 | 39.4 ± 6.5              |       | 0.423 | 37.6 ± 8.9                |        | 0.568 | 0.636 |  |  |  |  |
| 30 min          | HM | 38.7 ± 11.0                         | 0.475 |       | 37.2 ± 5.7              | 0.434 |       | 37.9 ± 8.6               | 0.265 |       | 38.2 ± 7.6                            | 0.433 |       | 38.5 ± 8.5              | 0.269 |       | 37.5 ± 6.7                | 0.405  |       | 0.987 |  |  |  |  |
|                 | LM | 39.2 ± 9.8                          |       |       | 39.0 ± 9.5              |       |       | 40.6 ± 8.0               |       |       | 40.4 ± 10.0                           |       |       | 41.4 ± 9.2              |       |       | 35.6 ± 8.6                |        |       | 0.321 |  |  |  |  |
| 60 min          | HM | 39.6 ± 7.2                          | 0.328 |       | 38.2 ± 7.9              | 0.420 |       | 39.9 ± 7.7               | 0.943 |       | 37.9 ± 5.9                            | 0.946 |       | 39.7 ± 6.8              | 0.274 |       | 39.0 ± 6.1                | 0.060  |       | 0.927 |  |  |  |  |
|                 | LM | 38.3 ± 7.1                          |       |       | 40.2 ± 7.2              |       |       | 40.1 ± 7.2               |       |       | 37.8 ± 8.2                            |       |       | 42.6 ± 8.9              |       |       | 35.2 ± 6.2                |        |       | 0.060 |  |  |  |  |
| Motile WOB (%)  |    |                                     |       |       |                         |       |       |                          |       |       |                                       |       |       |                         |       |       |                           |        |       |       |  |  |  |  |
| 5 min           | HM | 54.1 ± 8.4                          | 0.885 | 0.704 | 51.3 ± 9.1              | 0.699 | 0.636 | 51.2 ± 8.9               | 0.665 | 0.649 | 51.1 ± 6.4                            | 0.906 | 0.648 | 50.6 ± 6.0              | 0.733 | 1     | 49.9 ± 5.9                | 0.636  | 0.655 | 0.488 |  |  |  |  |
|                 | LM | 54.5 ± 7.8                          |       | 0.878 | 52.3 ± 7.4              |       | 0.889 | 51.2 ± 6.5               |       | 0.631 | 50.8 ± 7.2                            |       | 0.555 | 51.2 ± 5.5              |       | 0.247 | 50.7 ± 5.7                |        | 0.830 | 0.365 |  |  |  |  |
| 30 min          | HM | 52.4 ± 7.9                          | 0.574 |       | 49.3 ± 6.0 <sup>*</sup> | 0.048 |       | 49.3 ± 7.3               | 0.077 |       | 49.9 ± 6.6                            | 0.228 |       | 50.6 ± 6.7              | 0.228 |       | 49.4 ± 5.6                | 0.459  |       | 0.599 |  |  |  |  |
|                 | LM | 53.6 ± 7.0                          |       |       | 53.3 ± 7.4 <sup>*</sup> |       |       | 52.9 ± 6.2               |       |       | 53.0 ± 7.5                            |       |       | 52.9 ± 6.4              |       |       | 50.7 ± 6.4                |        |       | 0.731 |  |  |  |  |
| 60 min          | HM | 52.7 ± 6.0                          | 0.704 |       | 50.3 ± 7.0              | 0.254 |       | 51.0 ± 6.3               | 0.678 |       | 49.4 ± 5.2                            | 0.226 |       | 50.6 ± 6.1              | 0.083 |       | 50.9 ± 5.2                | 0.466  |       | 0.661 |  |  |  |  |
|                 | LM | 53.5 ± 4.9                          |       |       | 53.0 ± 7.4              |       |       | 51.8 ± 5.5               |       |       | 52.3 ± 6.3                            |       |       | 54.4 ± 7.2              |       |       | 49.7 ± 5.2                |        |       | 0.263 |  |  |  |  |
| Motile ALH (μm) |    |                                     |       |       |                         |       |       |                          |       |       |                                       |       |       |                         |       |       |                           |        |       |       |  |  |  |  |
| 5 min           | HM | 3.1 ± 0.6                           | 0.883 | 0.834 | 3.4 ± 0.8               | 0.495 | 0.796 | 3.4 ± 0.8                | 0.514 | 0.104 | 3.4 ± 0.7                             | 0.539 | 0.619 | 3.5 ± 0.8               | 0.216 | 0.424 | 3.5 ± 0.8                 | 0.596  | 0.676 | 0.335 |  |  |  |  |
|                 | LM | 3.0 ± 0.7                           |       | 0.152 | 3.3 ± 0.8               |       | 0.752 | 3.6 ± 0.9                |       | 0.573 | 3.5 ± 0.8                             |       | 0.877 | 3.2 ± 0.6               |       | 0.499 | 3.4 ± 0.7                 |        | 0.973 | 0.131 |  |  |  |  |
| 30 min          | HM | 3.1 ± 0.5 <sup>+</sup> <sup>a</sup> | 0.027 |       | 3.6 ± 0.7 <sup>ab</sup> | 0.236 |       | 3.8 ± 0.7 <sup>b</sup>   | 0.023 |       | 3.5 ± 0.6 <sup>b</sup>                | 0.639 |       | 3.7 ± 0.7 <sup>b</sup>  | 0.129 |       | 3.7 ± 0.7 <sup>b</sup>    | 0.382  |       | 0.005 |  |  |  |  |
|                 | LM | 2.7 ± 0.6 <sup>+</sup> <sup>a</sup> |       |       | 3.4 ± 0.7 <sup>b</sup>  |       |       | 3.4 ± 0.6 <sup>b</sup>   |       |       | 3.4 ± 0.9 <sup>b</sup>                |       |       | 3.4 ± 0.7 <sup>b</sup>  |       |       | 3.5 ± 0.9 <sup>b</sup>    |        |       | 0.006 |  |  |  |  |
| 60 min          | HM | 3.2 ± 0.5                           | 0.054 |       | 3.5 ± 0.6               | 0.088 |       | 3.7 ± 0.5                | 0.615 |       | 3.6 ± 0.5                             | 0.707 |       | 3.7 ± 0.7               | 0.164 |       | 3.5 ± 0.5                 | 0.963  |       | 0.057 |  |  |  |  |
|                 | LM | 2.9 ± 0.3 <sup>a</sup>              |       |       | 3.2 ± 0.6 <sup>ab</sup> |       |       | 3.6 ± 0.6 <sup>b</sup>   |       |       | 3.5 ± 1.0 <sup>b</sup>                |       |       | 3.3 ± 0.7 <sup>b</sup>  |       |       | 3.5 ± 0.8 <sup>b</sup>    |        |       | 0.029 |  |  |  |  |
| Motile BCF (Hz) |    |                                     |       |       |                         |       |       |                          |       |       |                                       |       |       |                         |       |       |                           |        |       |       |  |  |  |  |
| 5 min           | HM | 22.8 ± 4.3 <sup>+</sup>             | 0.01  | 0.144 | 23.1 ± 3.6 <sup>+</sup> | 0.028 | 0.090 | 22.9 ± 3.6 <sup>++</sup> | 0.002 | 0.075 | 22.5 ± 2.5 <sup>++</sup> <sup>a</sup> | 0.002 | 0.053 | 22.9 ± 3.3 <sup>+</sup> | 0.026 | 0.124 | 21.8 ± 2.8 <sup>+</sup>   | 0.028  | 0.408 | 0.799 |  |  |  |  |
|                 | LM | 20.2 ± 3.9 <sup>+</sup>             |       | 0.625 | 20.9 ± 2.4 <sup>+</sup> |       | 0.588 | 19.7 ± 2.7 <sup>++</sup> |       | 0.311 | 19.7 ± 3.2 <sup>++</sup>              |       | 0.405 | 20.9 ± 2.8 <sup>+</sup> |       | 0.595 | 19.9 ± 2.8 <sup>+</sup>   |        | 0.074 | 0.577 |  |  |  |  |
| 30 min          | HM | 20.7 ± 4.0                          | 0.240 |       | 21.1 ± 2.6              | 0.341 |       | 20.9 ± 2.9               | 0.773 |       | 20.9 ± 2.8 <sup>ab</sup>              | 0.268 |       | 21.1 ± 3.2              | 0.331 |       | 20.9 ± 2.5 <sup>++</sup>  | 0.003  |       | 0.998 |  |  |  |  |
|                 | LM | 19.7 ± 3.9                          |       |       | 20.2 ± 3.7              |       |       | 20.8 ± 3.3               |       |       | 19.9 ± 3.0                            |       |       | 20.2 ± 3.1              |       |       | 18.1 ± 3.4 <sup>++</sup>  |        |       | 0.129 |  |  |  |  |
| 60 min          | HM | 20.7 ± 3.7                          | 0.088 |       | 21.4 ± 3.2              | 0.469 |       | 21.3 ± 2.7 <sup>+</sup>  | 0.024 |       | 20.9 ± 2.0 <sup>+</sup> <sup>b</sup>  | 0.011 |       | 21.8 ± 2.5 <sup>+</sup> | 0.049 |       | 21.0 ± 1.9 <sup>+++</sup> | <0.001 |       | 0.838 |  |  |  |  |
|                 | LM | 18.9 ± 4.0                          |       |       | 20.7 ± 3.4              |       |       | 19.6 ± 2.8 <sup>+</sup>  |       |       | 18.7 ± 3.0 <sup>+</sup>               |       |       | 20.0 ± 2.8 <sup>+</sup> |       |       | 17.7 ± 3.1 <sup>+++</sup> |        |       | 0.075 |  |  |  |  |

Supplementary Table S3. Continued...

| NP VCL (μm/s) |    |             |       |       |                          |       |       |                          |       |       |             |       |       |              |       |       |             |       |       |  |  |       |  |  |
|---------------|----|-------------|-------|-------|--------------------------|-------|-------|--------------------------|-------|-------|-------------|-------|-------|--------------|-------|-------|-------------|-------|-------|--|--|-------|--|--|
| 5 min         | HM | 85.7 ± 22.4 | 0.174 | 0.850 | 96.3 ± 33.2              | 0.564 | 0.679 | 94.8 ± 34.2              | 0.524 | 0.874 | 91.6 ± 31.9 | 0.606 | 0.638 | 95.3 ± 29.8  | 0.322 | 0.658 | 96.5 ± 35.9 | 0.303 | 0.749 |  |  | 0.822 |  |  |
|               | LM | 78.8 ± 23.5 |       | 0.674 | 91.0 ± 31.6              |       | 0.892 | 89.9 ± 36.8              |       | 0.545 | 87.6 ± 33.6 |       | 0.980 | 86.8 ± 26.4  |       | 0.809 | 86.5 ± 30.9 |       | 0.917 |  |  | 0.801 |  |  |
| 30 min        | HM | 85.8 ± 25.1 | 0.066 |       | 95.5 ± 32.5              | 0.475 |       | 99.3 ± 41.3              | 0.742 |       | 91.7 ± 29.3 | 0.431 |       | 98.2 ± 33.2  | 0.392 |       | 89.8 ± 27.0 | 0.949 |       |  |  | 0.778 |  |  |
|               | LM | 73.2 ± 19.9 |       |       | 87.1 ± 29.8              |       |       | 91.2 ± 34.2              |       |       | 85.8 ± 36.1 |       |       | 89.8 ± 27.4  |       |       | 90.3 ± 31.0 |       |       |  |  | 0.415 |  |  |
| 60 min        | HM | 89.3 ± 20.4 | 0.054 |       | 103.5 ± 28.3             | 0.087 |       | 94.4 ± 28.5              | 0.502 |       | 99.3 ± 27.2 | 0.184 |       | 102.7 ± 32.6 | 0.188 |       | 96.7 ± 26.5 | 0.164 |       |  |  | 0.608 |  |  |
|               | LM | 75.6 ± 20.7 |       |       | 88.3 ± 23.8              |       |       | 101.2 ± 32.2             |       |       | 86.0 ± 33.1 |       |       | 89.4 ± 27.3  |       |       | 84.5 ± 26.5 |       |       |  |  | 0.174 |  |  |
| NP VAP (μm/s) |    |             |       |       |                          |       |       |                          |       |       |             |       |       |              |       |       |             |       |       |  |  |       |  |  |
| 5 min         | HM | 41.1 ± 11.3 | 0.773 | 0.858 | 42.7 ± 13.6              | 0.790 | 0.800 | 42.8 ± 13.8              | 0.629 | 0.933 | 42.1 ± 14.4 | 0.660 | 0.694 | 43.7 ± 11.9  | 0.242 | 0.911 | 41.8 ± 13.9 | 0.711 | 0.795 |  |  | 0.988 |  |  |
|               | LM | 40.6 ± 10.5 |       | 0.613 | 43.6 ± 10.8              |       | 0.870 | 41.3 ± 13.5              |       | 0.521 | 40.4 ± 12.3 |       | 0.949 | 39.8 ± 11.0  |       | 0.469 | 41.3 ± 12.3 |       | 0.621 |  |  | 0.909 |  |  |
| 30 min        | HM | 40.3 ± 12.2 | 0.419 |       | 42.0 ± 13.7              | 0.967 |       | 41.7 ± 15.7              | 0.853 |       | 40.2 ± 14.0 | 0.882 |       | 43.8 ± 14.0  | 0.645 |       | 40.8 ± 12.1 | 0.832 |       |  |  | 0.954 |  |  |
|               | LM | 37.4 ± 11.8 |       |       | 42.2 ± 11.0              |       |       | 44.0 ± 11.0              |       |       | 40.4 ± 13.7 |       |       | 43.0 ± 10.2  |       |       | 41.5 ± 10.0 |       |       |  |  | 0.448 |  |  |
| 60 min        | HM | 42.3 ± 11.5 | 0.274 |       | 44.8 ± 13.7              | 0.197 |       | 43.2 ± 13.9              | 0.574 |       | 44.0 ± 14.1 | 0.287 |       | 45.3 ± 14.3  | 0.504 |       | 43.5 ± 12.5 | 0.215 |       |  |  | 0.986 |  |  |
|               | LM | 38.7 ± 11.0 |       |       | 41.9 ± 13.0              |       |       | 45.7 ± 11.9              |       |       | 39.2 ± 14.4 |       |       | 43.8 ± 13.0  |       |       | 38.2 ± 14.3 |       |       |  |  | 0.419 |  |  |
| NP VSL (μm/s) |    |             |       |       |                          |       |       |                          |       |       |             |       |       |              |       |       |             |       |       |  |  |       |  |  |
| 5 min         | HM | 27.6 ± 8.8  | 0.759 | 0.707 | 29.3 ± 8.5               | 0.949 | 0.632 | 29.6 ± 9.0               | 0.344 | 0.636 | 28.1 ± 9.3  | 0.232 | 0.715 | 30.5 ± 8.0   | 0.143 | 0.767 | 27.7 ± 9.1  | 0.951 | 0.737 |  |  | 0.827 |  |  |
|               | LM | 28.5 ± 10.3 |       | 0.538 | 29.1 ± 10.2              |       | 0.632 | 27.1 ± 9.4               |       | 0.499 | 25.7 ± 9.2  |       | 0.788 | 26.9 ± 8.9   |       | 0.509 | 27.2 ± 10.0 |       | 0.865 |  |  | 0.862 |  |  |
| 30 min        | HM | 25.9 ± 9.5  | 0.848 |       | 26.8 ± 9.7               | 0.726 |       | 27.0 ± 10.8              | 0.503 |       | 26.8 ± 10.4 | 0.952 |       | 28.7 ± 9.7   | 0.995 |       | 26.2 ± 9.4  | 0.718 |       |  |  | 0.952 |  |  |
|               | LM | 25.2 ± 11.8 |       |       | 27.8 ± 8.9               |       |       | 30.1 ± 8.2               |       |       | 27.0 ± 11.0 |       |       | 28.7 ± 11.0  |       |       | 26.6 ± 6.8  |       |       |  |  | 0.720 |  |  |
| 60 min        | HM | 27.9 ± 8.3  | 0.438 |       | 29.0 ± 10.0              | 0.339 |       | 28.9 ± 10.0              | 0.964 |       | 29.4 ± 10.7 | 0.198 |       | 30.3 ± 9.8   | 0.988 |       | 28.3 ± 9.3  | 0.287 |       |  |  | 0.984 |  |  |
|               | LM | 25.6 ± 10.1 |       |       | 26.3 ± 9.2               |       |       | 29.5 ± 8.7               |       |       | 24.8 ± 10.7 |       |       | 30.9 ± 13.6  |       |       | 24.7 ± 11.0 |       |       |  |  | 0.373 |  |  |
| NP STR (%)    |    |             |       |       |                          |       |       |                          |       |       |             |       |       |              |       |       |             |       |       |  |  |       |  |  |
| 5 min         | HM | 66.0 ± 8.8  | 0.578 | 0.558 | 68.9 ± 9.0 <sup>a</sup>  | 0.392 | 0.050 | 68.8 ± 8.2               | 0.286 | 0.095 | 66.0 ± 7.8  | 0.259 | 0.557 | 69.5 ± 9.0   | 0.097 | 0.145 | 66.2 ± 8.3  | 0.736 | 0.357 |  |  | 0.474 |  |  |
|               | LM | 67.9 ± 13.7 |       | 0.348 | 66.0 ± 13.8              |       | 0.379 | 64.3 ± 10.2              |       | 0.408 | 62.5 ± 12.8 |       | 0.781 | 64.6 ± 11.0  |       | 0.827 | 65.2 ± 12.4 |       | 0.457 |  |  | 0.769 |  |  |
| 30 min        | HM | 63.3 ± 8.4  | 0.517 |       | 63.4 ± 7.8 <sup>ab</sup> | 0.686 |       | 63.0 ± 10.2              | 0.163 |       | 64.1 ± 8.0  | 0.969 |       | 65.4 ± 8.1   | 0.775 |       | 62.2 ± 13.5 | 0.915 |       |  |  | 0.912 |  |  |
|               | LM | 61.4 ± 19.5 |       |       | 64.6 ± 12.3              |       |       | 67.8 ± 12.9              |       |       | 64.0 ± 10.1 |       |       | 65.1 ± 15.6  |       |       | 63.3 ± 8.5  |       |       |  |  | 0.849 |  |  |
| 60 min        | HM | 65.1 ± 8.7  | 0.565 |       | 63.5 ± 8.6 <sup>b</sup>  | 0.339 |       | 65.6 ± 8.3               | 0.489 |       | 63.4 ± 8.1  | 0.548 |       | 65.3 ± 7.2   | 0.631 |       | 63.0 ± 7.1  | 0.512 |       |  |  | 0.872 |  |  |
|               | LM | 63.0 ± 12.7 |       |       | 60.5 ± 12.2              |       |       | 63.3 ± 11.1              |       |       | 61.7 ± 9.5  |       |       | 67.2 ± 15.3  |       |       | 61.0 ± 11.0 |       |       |  |  | 0.602 |  |  |
| NP LIN (%)    |    |             |       |       |                          |       |       |                          |       |       |             |       |       |              |       |       |             |       |       |  |  |       |  |  |
| 5 min         | HM | 36.2 ± 13.5 | 0.209 | 0.281 | 33.9 ± 7.1               | 0.657 | 0.061 | 34.0 ± 8.8               | 0.775 | 0.219 | 32.8 ± 7.8  | 1     | 0.408 | 35.8 ± 9.4   | 0.592 | 0.127 | 31.8 ± 5.8  | 0.357 | 0.877 |  |  | 0.508 |  |  |
|               | LM | 38.5 ± 12.1 |       | 0.296 | 35.2 ± 12.2              |       | 0.459 | 33.6 ± 7.9               |       | 0.244 | 32.0 ± 11.4 |       | 0.701 | 32.8 ± 8.4   |       | 0.587 | 33.9 ± 9.6  |       | 0.257 |  |  | 0.340 |  |  |
| 30 min        | HM | 31.9 ± 7.7  | 0.602 |       | 30.1 ± 5.3               | 0.093 |       | 29.6 ± 9.7 <sup>c</sup>  | 0.025 |       | 30.2 ± 8.5  | 0.324 |       | 32.0 ± 8.9   | 0.173 |       | 30.9 ± 10.4 | 0.629 |       |  |  | 0.911 |  |  |
|               | LM | 33.6 ± 13.4 |       |       | 35.4 ± 13.8              |       |       | 36.3 ± 10.1 <sup>c</sup> |       |       | 32.8 ± 8.9  |       |       | 34.8 ± 11.6  |       |       | 32.2 ± 7.6  |       |       |  |  | 0.795 |  |  |
| 60 min        | HM | 32.5 ± 6.5  | 0.641 |       | 29.9 ± 6.4               | 0.675 |       | 33.3 ± 8.6               | 0.539 |       | 29.9 ± 7.2  | 0.942 |       | 30.8 ± 7.0   | 0.106 |       | 30.7 ± 5.9  | 0.608 |       |  |  | 0.579 |  |  |
|               | LM | 33.7 ± 8.9  |       |       | 31.1 ± 9.4               |       |       | 31.5 ± 8.8               |       |       | 30.4 ± 6.4  |       |       | 36.2 ± 12.5  |       |       | 29.3 ± 10.0 |       |       |  |  | 0.270 |  |  |

Supplementary Table S3. Continued...

| NP WOB (%)    |    |                            |       |       |                            |       |       |                              |       |       |                            |       |       |                             |       |       |                            |       |       |       |
|---------------|----|----------------------------|-------|-------|----------------------------|-------|-------|------------------------------|-------|-------|----------------------------|-------|-------|-----------------------------|-------|-------|----------------------------|-------|-------|-------|
| 5 min         | HM | 50.5 ± 7.4                 | 0.116 | 0.695 | 47.3 ± 8.3                 | 0.111 | 0.465 | 47.6 ± 8.3                   | 0.333 | 0.312 | 47.8 ± 8.0                 | 0.496 | 0.551 | 49.3 ± 7.5                  | 0.951 | 0.343 | 46.4 ± 6.2                 | 0.060 | 0.895 | 0.477 |
|               | LM | 54.3 ± 8.8                 |       | 0.463 | 51.8 ± 10.8                |       | 0.615 | 49.9 ± 7.3                   |       | 0.279 | 49.7 ± 10.2                |       | 0.712 | 48.1 ± 8.8                  |       | 0.389 | 50.3 ± 7.9                 |       | 0.269 | 0.262 |
| 30 min        | HM | 49.1 ± 7.2                 | 0.366 |       | 46.5 ± 7.7 <sup>*</sup>    | 0.033 |       | 44.8 ± 9.4 <sup>***</sup>    | 0.009 |       | 45.5 ± 9.9                 | 0.112 |       | 47.5 ± 9.0                  | 0.201 |       | 47.3 ± 8.3                 | 0.322 |       | 0.587 |
|               | LM | 51.4 ± 9.7                 |       |       | 53.1 ± 12.3 <sup>*</sup>   |       |       | 52.0 ± 9.0 <sup>***</sup>    |       |       | 49.8 ± 8.5                 |       |       | 50.8 ± 7.9                  |       |       | 49.7 ± 8.1                 |       |       | 0.810 |
| 60 min        | HM | 48.9 ± 5.9                 | 0.247 |       | 45.4 ± 6.7                 | 0.109 |       | 48.5 ± 7.6                   | 0.828 |       | 45.3 ± 7.9                 | 0.431 |       | 45.7 ± 7.1 <sup>*</sup>     | 0.039 |       | 47.0 ± 6.1                 | 0.850 |       | 0.407 |
|               | LM | 51.5 ± 7.3                 |       |       | 49.7 ± 9.2                 |       |       | 48.0 ± 7.5                   |       |       | 47.8 ± 7.4                 |       |       | 51.6 ± 9.6 <sup>*</sup>     |       |       | 46.0 ± 11.4                |       |       | 0.338 |
| MP VCL (μm/s) |    |                            |       |       |                            |       |       |                              |       |       |                            |       |       |                             |       |       |                            |       |       |       |
| 5 min         | HM | 122.6 ± 23.6               | 0.29  | 0.531 | 128.7 ± 27.9               | 0.757 | 0.314 | 135.7 ± 21.9                 | 0.699 | 0.107 | 134.0 ± 26.2               | 0.378 | 0.685 | 135.2 ± 24.7                | 0.121 | 0.444 | 133.5 ± 25.3               | 0.879 | 0.373 | 0.338 |
|               | LM | 130.5 ± 22.6               |       | 0.087 | 131.6 ± 31.8               |       | 0.282 | 133.0 ± 25.5                 |       | 0.656 | 141.3 ± 29.9               |       | 0.919 | 123.9 ± 23.1                |       | 0.419 | 134.8 ± 29.0               |       | 0.069 | 0.438 |
| 30 min        | HM | 125.3 ± 17.4 <sup>a</sup>  | 0.081 |       | 139.5 ± 21.8 <sup>ab</sup> | 0.359 |       | 149.5 ± 26.5 <sup>***b</sup> | 0.003 |       | 135.5 ± 21.8 <sup>ab</sup> | 0.693 |       | 143.9 ± 24.9 <sup>ab</sup>  | 0.152 |       | 140.3 ± 26.4 <sup>ab</sup> | 0.484 |       | 0.020 |
|               | LM | 114.4 ± 20.4               |       |       | 133.6 ± 17.5               |       |       | 126.3 ± 22.5 <sup>**</sup>   |       |       | 138.5 ± 28.1               |       |       | 125.9 ± 35.1                |       |       | 133.6 ± 34.8               |       |       | 0.121 |
| 60 min        | HM | 129.7 ± 20.0               | 0.930 |       | 136.0 ± 21.4               | 0.061 |       | 146.4 ± 20.3 <sup>*</sup>    | 0.033 |       | 139.8 ± 12.1               | 0.760 |       | 140.5 ± 19.1                | 0.533 |       | 129.9 ± 20.3 <sup>*</sup>  | 0.026 |       | 0.061 |
|               | LM | 129.0 ± 24.7 <sup>ac</sup> |       |       | 123.0 ± 17.4 <sup>c</sup>  |       |       | 129.1 ± 25.7 <sup>ac</sup>   |       |       | 142.2 ± 30.6 <sup>ab</sup> |       |       | 135.9 ± 23.0 <sup>abc</sup> |       |       | 160.3 ± 38.6 <sup>ab</sup> |       |       | 0.030 |
| MP VAP (μm/s) |    |                            |       |       |                            |       |       |                              |       |       |                            |       |       |                             |       |       |                            |       |       |       |
| 5 min         | HM | 65.7 ± 9.6                 | 0.902 | 0.538 | 66.1 ± 7.9                 | 0.667 | 0.720 | 67.9 ± 8.3                   | 0.535 | 0.321 | 68.0 ± 8.2                 | 0.530 | 0.669 | 67.5 ± 10.3                 | 0.321 | 0.386 | 67.8 ± 7.9                 | 0.651 | 0.908 | 0.899 |
|               | LM | 67.3 ± 9.6                 |       | 0.082 | 64.9 ± 10.6                |       | 0.910 | 66.3 ± 9.6                   |       | 0.925 | 69.8 ± 10.7                |       | 0.325 | 64.7 ± 7.7                  |       | 0.374 | 66.6 ± 9.9                 |       | 0.605 | 0.548 |
| 30 min        | HM | 64.6 ± 13.5                | 0.283 |       | 67.1 ± 10.0                | 0.724 |       | 70.1 ± 7.3                   | 0.113 |       | 67.4 ± 8.0                 | 0.966 |       | 71.2 ± 10.4                 | 0.294 |       | 66.9 ± 7.0                 | 0.932 |       | 0.217 |
|               | LM | 60.7 ± 6.9                 |       |       | 66.0 ± 11.5                |       |       | 65.8 ± 10.5                  |       |       | 67.6 ± 11.4                |       |       | 68.3 ± 7.6                  |       |       | 66.6 ± 14.9                |       |       | 0.363 |
| 60 min        | HM | 68.7 ± 12.7                | 0.817 |       | 68.5 ± 10.0                | 0.244 |       | 71.6 ± 8.2                   | 0.082 |       | 69.6 ± 7.2                 | 0.280 |       | 70.6 ± 8.1                  | 0.366 |       | 67.6 ± 7.5                 | 0.424 |       | 0.789 |
|               | LM | 67.6 ± 12.4                |       |       | 64.5 ± 9.7                 |       |       | 67.1 ± 8.8                   |       |       | 73.2 ± 11.2                |       |       | 67.6 ± 11.0                 |       |       | 71.0 ± 15.6                |       |       | 0.350 |
| MP VSL (μm/s) |    |                            |       |       |                            |       |       |                              |       |       |                            |       |       |                             |       |       |                            |       |       |       |
| 5 min         | HM | 55.4 ± 12.9                | 0.485 | 0.466 | 53.2 ± 12.1                | 0.883 | 0.830 | 53.9 ± 13.2                  | 0.782 | 0.664 | 54.5 ± 10.5                | 0.837 | 0.468 | 53.7 ± 13.2                 | 0.625 | 0.458 | 54.9 ± 12.0                | 0.073 | 0.750 | 0.991 |
|               | LM | 52.5 ± 11.7                |       | 0.472 | 52.7 ± 13.1                |       | 0.641 | 52.5 ± 12.9                  |       | 0.865 | 53.9 ± 10.1                |       | 0.887 | 53.4 ± 10.7                 |       | 0.930 | 48.7 ± 11.3                |       | 0.777 | 0.741 |
| 30 min        | HM | 50.9 ± 17.6                | 0.365 |       | 52.8 ± 11.7                | 0.550 |       | 53.7 ± 11.4                  | 0.826 |       | 52.8 ± 11.8                | 0.876 |       | 54.0 ± 11.6                 | 0.991 |       | 53.2 ± 11.3                | 0.30  |       | 0.998 |
|               | LM | 49.0 ± 10.3                |       |       | 50.1 ± 16.7                |       |       | 52.3 ± 14.3                  |       |       | 52.3 ± 12.5                |       |       | 54.5 ± 10.5                 |       |       | 50.1 ± 12.3                |       |       | 0.823 |
| 60 min        | HM | 56.1 ± 13.6                | 0.777 |       | 55.0 ± 11.7                | 0.836 |       | 56.8 ± 11.5                  | 0.804 |       | 57.3 ± 12.2                | 0.206 |       | 58.1 ± 12.5                 | 0.181 |       | 55.8 ± 11.0                | 0.351 |       | 0.981 |
|               | LM | 54.2 ± 13.5                |       |       | 55.2 ± 11.7                |       |       | 54.6 ± 14.2                  |       |       | 53.9 ± 10.7                |       |       | 54.5 ± 11.3                 |       |       | 51.7 ± 12.4                |       |       | 0.988 |
| MP STR (%)    |    |                            |       |       |                            |       |       |                              |       |       |                            |       |       |                             |       |       |                            |       |       |       |
| 5 min         | HM | 83.9 ± 11.6 <sup>*</sup>   | 0.027 | 0.143 | 80.3 ± 13.0                | 0.903 | 0.896 | 79.4 ± 12.0                  | 0.815 | 0.680 | 80.5 ± 9.6                 | 0.865 | 0.546 | 79.4 ± 11.8                 | 0.388 | 0.539 | 81.0 ± 11.5                | 0.173 | 0.643 | 0.798 |
|               | LM | 78.1 ± 9.3 <sup>*</sup>    |       | 0.879 | 80.6 ± 13.2                |       | 0.272 | 79.7 ± 13.3                  |       | 0.949 | 79.2 ± 11.1                |       | 0.768 | 82.3 ± 11.5                 |       | 0.821 | 75.1 ± 14.5                |       | 0.961 | 0.519 |
| 30 min        | HM | 76.2 ± 18.3                | 0.821 |       | 79.0 ± 10.6                | 0.807 |       | 76.8 ± 12.6                  | 0.531 |       | 78.0 ± 12.2                | 0.814 |       | 76.6 ± 13.2                 | 0.593 |       | 79.3 ± 11.5                | 0.503 |       | 0.953 |
|               | LM | 80.0 ± 11.1                |       |       | 75.6 ± 15.4                |       |       | 79.1 ± 11.8                  |       |       | 77.9 ± 11.9                |       |       | 80.7 ± 9.9                  |       |       | 76.3 ± 13.3                |       |       | 0.757 |
| 60 min        | HM | 81.4 ± 9.9                 | 0.656 |       | 80.6 ± 10.5                | 0.270 |       | 79.7 ± 11.3                  | 0.497 |       | 81.6 ± 11.1                | 0.055 |       | 81.4 ± 11.4                 | 0.492 |       | 82.4 ± 9.2                 | 0.105 |       | 0.979 |
|               | LM | 79.0 ± 11.4                |       |       | 84.6 ± 8.3                 |       |       | 80.5 ± 13.1                  |       |       | 76.4 ± 13.9                |       |       | 80.3 ± 9.9                  |       |       | 75.2 ± 15.0                |       |       | 0.339 |



Supplementary Table S3. Continued...

| MP LIN (%)    |    |                          |       |       |                        |       |       |                            |       |       |                         |       |       |                        |       |       |                           |        |       |       |  |  |  |
|---------------|----|--------------------------|-------|-------|------------------------|-------|-------|----------------------------|-------|-------|-------------------------|-------|-------|------------------------|-------|-------|---------------------------|--------|-------|-------|--|--|--|
| 5 min         | HM | 49.3 ± 13.3              | 0.225 | 0.435 | 47.0 ± 16.0            | 0.705 | 0.326 | 44.1 ± 13.7                | 0.694 | 0.622 | 45.7 ± 12.3             | 0.468 | 0.677 | 43.9 ± 13.7            | 0.510 | 0.656 | 45.9 ± 13.5               | 0.220  | 0.443 | 0.791 |  |  |  |
|               | LM | 44.5 ± 10.4              |       | 0.771 | 45.6 ± 14.6            |       | 0.747 | 42.7 ± 10.5                |       | 0.756 | 43.2 ± 11.4             |       | 0.885 | 47.4 ± 11.0            |       | 0.872 | 41.1 ± 12.3               |        | 0.425 | 0.558 |  |  |  |
| 30 min        | HM | 44.0 ± 15.8              | 0.567 |       | 41.0 ± 10.5            | 0.915 |       | 40.5 ± 12.8                | 0.195 |       | 43.1 ± 11.6             | 0.681 |       | 41.8 ± 12.2            | 0.101 |       | 42.2 ± 11.9               | 0.910  |       | 0.945 |  |  |  |
|               | LM | 46.6 ± 12.0              |       |       | 40.6 ± 12.8            |       |       | 44.4 ± 9.2                 |       |       | 41.6 ± 12.1             |       |       | 47.0 ± 15.3            |       |       | 41.6 ± 12.5               |        |       | 0.450 |  |  |  |
| 60 min        | HM | 46.5 ± 11.5              | 0.417 |       | 44.2 ± 12.4            | 0.422 |       | 42.2 ± 11.6                | 0.436 |       | 43.1 ± 10.0             | 0.212 |       | 44.5 ± 11.5            | 0.901 |       | 46.6 ± 11.1 <sup>+</sup>  | 0.015  |       | 0.803 |  |  |  |
|               | LM | 43.9 ± 10.9              |       |       | 47.6 ± 11.9            |       |       | 45.7 ± 15.1                |       |       | 43.0 ± 13.2             |       |       | 45.1 ± 14.6            |       |       | 36.1 ± 10.8 <sup>+</sup>  |        |       | 0.297 |  |  |  |
| MP WOB (%)    |    |                          |       |       |                        |       |       |                            |       |       |                         |       |       |                        |       |       |                           |        |       |       |  |  |  |
| 5 min         | HM | 56.8 ± 9.9               | 0.553 | 0.705 | 56.0 ± 13.1            | 0.612 | 0.199 | 53.5 ± 10.8                | 0.702 | 0.587 | 55.0 ± 10.8             | 0.718 | 0.468 | 53.1 ± 10.4            | 0.482 | 0.996 | 54.6 ± 10.1               | 0.281  | 0.345 | 0.846 |  |  |  |
|               | LM | 55.0 ± 8.2               |       | 0.775 | 54.0 ± 11.7            |       | 0.514 | 52.5 ± 7.8                 |       | 0.536 | 53.3 ± 8.5              |       | 0.640 | 55.6 ± 7.8             |       | 0.822 | 53.0 ± 9.9                |        | 0.187 | 0.852 |  |  |  |
| 30 min        | HM | 54.2 ± 12.1              | 0.571 |       | 50.5 ± 8.1             | 0.420 |       | 50.7 ± 9.9                 | 0.131 |       | 52.9 ± 8.1              | 0.706 |       | 52.8 ± 10.4            | 0.369 |       | 51.2 ± 9.2                | 0.850  |       | 0.763 |  |  |  |
|               | LM | 56.2 ± 9.1               |       |       | 52.6 ± 8.3             |       |       | 54.5 ± 6.6                 |       |       | 51.9 ± 9.4              |       |       | 56.2 ± 13.1            |       |       | 52.5 ± 10.1               |        |       | 0.567 |  |  |  |
| 60 min        | HM | 55.6 ± 9.6               | 0.441 |       | 53.2 ± 9.9             | 0.653 |       | 51.4 ± 8.5                 | 0.310 |       | 51.7 ± 6.6              | 0.311 |       | 53.0 ± 8.5             | 0.843 |       | 55.1 ± 8.9 <sup>+</sup>   | 0.018  |       | 0.612 |  |  |  |
|               | LM | 53.9 ± 7.2               |       |       | 54.7 ± 9.9             |       |       | 55.0 ± 12.0                |       |       | 54.9 ± 11.1             |       |       | 53.8 ± 13.7            |       |       | 46.8 ± 8.7 <sup>+</sup>   |        |       | 0.385 |  |  |  |
| MP ALH (μm)   |    |                          |       |       |                        |       |       |                            |       |       |                         |       |       |                        |       |       |                           |        |       |       |  |  |  |
| 5 min         | HM | 3.1 ± 0.9                | 0.069 | 0.339 | 3.4 ± 1.1              | 0.660 | 0.239 | 3.6 ± 0.9                  | 0.604 | 0.094 | 3.6 ± 0.8               | 0.423 | 0.448 | 3.6 ± 1.0              | 0.633 | 0.184 | 3.6 ± 1.0                 | 0.319  | 0.234 | 0.415 |  |  |  |
|               | LM | 3.7 ± 0.8                |       | 0.365 | 3.6 ± 1.0              |       | 0.251 | 3.8 ± 1.0                  |       | 0.615 | 3.9 ± 1.0               |       | 0.678 | 3.4 ± 0.9              |       | 0.279 | 3.9 ± 1.0                 |        | 0.066 | 0.590 |  |  |  |
| 30 min        | HM | 4.8 ± 6.6                | 0.713 |       | 3.8 ± 0.8              | 0.817 |       | 4.1 ± 1.0 <sup>+</sup>     | 0.017 |       | 3.8 ± 0.8               | 0.791 |       | 4.0 ± 0.9              | 0.234 |       | 4.0 ± 1.0                 | 0.565  |       | 0.198 |  |  |  |
|               | LM | 3.3 ± 0.8                |       |       | 3.8 ± 0.7              |       |       | 3.5 ± 0.6 <sup>+</sup>     |       |       | 3.9 ± 1.0               |       |       | 3.7 ± 1.0              |       |       | 3.8 ± 1.2                 |        |       | 0.198 |  |  |  |
| 60 min        | HM | 3.4 ± 0.7                | 0.824 |       | 3.7 ± 0.8              | 0.185 |       | 4.1 ± 0.8                  | 0.075 |       | 3.9 ± 0.5               | 0.442 |       | 3.9 ± 0.7              | 0.551 |       | 3.6 ± 0.6 <sup>***</sup>  | <0.001 |       | 0.062 |  |  |  |
|               | LM | 3.5 ± 0.8 <sup>+</sup>   |       |       | 3.4 ± 0.6 <sup>+</sup> |       |       | 3.6 ± 1.0 <sup>+</sup>     |       |       | 4.1 ± 1.0 <sup>ab</sup> |       |       | 3.9 ± 0.6 <sup>+</sup> |       |       | 4.7 ± 1.0 <sup>***b</sup> |        |       | 0.001 |  |  |  |
| MP BCF (Hz)   |    |                          |       |       |                        |       |       |                            |       |       |                         |       |       |                        |       |       |                           |        |       |       |  |  |  |
| 5 min         | HM | 25.0 ± 5.0 <sup>++</sup> | 0.007 | 0.062 | 24.0 ± 5.5             | 0.240 | 0.407 | 23.3 ± 4.5                 | 0.063 | 0.265 | 23.0 ± 3.6              | 0.118 | 0.395 | 23.2 ± 6.4             | 0.376 | 0.372 | 23.2 ± 4.8                | 0.078  | 0.336 | 0.762 |  |  |  |
|               | LM | 20.7 ± 4.1 <sup>++</sup> |       | 0.164 | 21.9 ± 4.8             |       | 0.366 | 20.9 ± 4.2                 |       | 0.499 | 21.3 ± 4.6              |       | 0.162 | 22.5 ± 5.0             |       | 0.248 | 20.6 ± 4.8                |        | 0.459 | 0.732 |  |  |  |
| 30 min        | HM | 21.6 ± 4.9               | 0.598 |       | 22.1 ± 4.3             | 0.264 |       | 21.3 ± 4.2                 | 0.826 |       | 21.7 ± 3.5              | 0.131 |       | 21.1 ± 4.6             | 0.977 |       | 21.4 ± 3.6                | 0.181  |       | 0.979 |  |  |  |
|               | LM | 20.7 ± 4.5               |       |       | 20.4 ± 4.9             |       |       | 21.7 ± 3.8                 |       |       | 19.8 ± 4.6              |       |       | 21.0 ± 4.5             |       |       | 20.1 ± 8.6                |        |       | 0.882 |  |  |  |
| 60 min        | HM | 22.5 ± 4.9               | 0.595 |       | 23.4 ± 4.6             | 0.551 |       | 22.0 ± 4.4                 | 0.219 |       | 21.8 ± 3.5 <sup>+</sup> | 0.033 |       | 22.2 ± 4.1             | 0.120 |       | 22.2 ± 2.9 <sup>***</sup> | <0.001 |       | 0.894 |  |  |  |
|               | LM | 21.4 ± 6.2               |       |       | 22.5 ± 3.9             |       |       | 20.1 ± 4.2                 |       |       | 18.2 ± 5.7 <sup>+</sup> |       |       | 19.8 ± 5.0             |       |       | 17.9 ± 3.3 <sup>***</sup> |        |       | 0.079 |  |  |  |
| RP VCL (μm/s) |    |                          |       |       |                        |       |       |                            |       |       |                         |       |       |                        |       |       |                           |        |       |       |  |  |  |
| 5 min         | HM | 141.0 ± 14.0             | 0.796 | 0.143 | 149.6 ± 19.3           | 0.356 | 0.226 | 143.8 ± 26.9 <sup>+</sup>  | 0.715 | 0.030 | 152.7 ± 20.6            | 0.786 | 0.174 | 157.1 ± 30.2           | 0.329 | 0.441 | 153.7 ± 20.8              | 0.220  | 0.398 | 0.277 |  |  |  |
|               | LM | 147.0 ± 25.9             |       | 0.889 | 142.8 ± 18.4           |       | 0.210 | 147.1 ± 22.7               |       | 0.086 | 153.1 ± 19.3            |       | 0.723 | 146.9 ± 20.5           |       | 0.831 | 147.5 ± 29.0              |        | 0.931 | 0.933 |  |  |  |
| 30 min        | HM | 147.1 ± 14.5             | 0.566 |       | 157.9 ± 27.0           | 0.157 |       | 158.9 ± 26.3 <sup>ab</sup> | 0.125 |       | 157.8 ± 22.5            | 0.549 |       | 159.2 ± 21.4           | 0.222 |       | 154.8 ± 22.4              | 0.755  |       | 0.700 |  |  |  |
|               | LM | 143.0 ± 20.3             |       |       | 143.3 ± 22.6           |       |       | 145.2 ± 21.4               |       |       | 152.0 ± 27.2            |       |       | 150.9 ± 27.8           |       |       | 151.5 ± 34.2              |        |       | 0.908 |  |  |  |
| 60 min        | HM | 151.4 ± 13.2             | 0.587 |       | 164.2 ± 18.2           | 0.378 |       | 167.8 ± 22.0 <sup>+</sup>  | 0.670 |       | 169.1 ± 28.3            | 0.850 |       | 168.3 ± 28.0           | 0.208 |       | 163.7 ± 20.2              | 0.469  |       | 0.390 |  |  |  |
|               | LM | 146.8 ± 24.3             |       |       | 156.9 ± 19.6           |       |       | 163.9 ± 25.4               |       |       | 160.1 ± 26.1            |       |       | 153.5 ± 21.9           |       |       | 169.0 ± 57.7              |        |       | 0.737 |  |  |  |

Supplementary Table S3. Continued...

| RP VAP ( $\mu\text{m/s}$ ) |        |    |                             |       |       |                 |       |       |                             |       |       |                 |       |       |                                |       |       |                 |       |       |       |
|----------------------------|--------|----|-----------------------------|-------|-------|-----------------|-------|-------|-----------------------------|-------|-------|-----------------|-------|-------|--------------------------------|-------|-------|-----------------|-------|-------|-------|
| 60 min                     | 5 min  | HM | 81.2 $\pm$ 13.6             | 0.438 | 0.351 | 80.7 $\pm$ 13.3 | 0.378 | 0.210 | 84.9 $\pm$ 12.8             | 0.365 | 0.156 | 82.2 $\pm$ 13.2 | 0.983 | 0.108 | 82.4 $\pm$ 15.8 <sup>*</sup>   | 0.019 | 0.065 | 84.6 $\pm$ 12.4 | 0.114 | 0.194 | 0.924 |
|                            |        | LM | 77.4 $\pm$ 15.2             |       | 0.606 | 75.8 $\pm$ 10.9 |       | 0.137 | 80.7 $\pm$ 13.3             |       | 0.057 | 80.0 $\pm$ 12.1 |       | 0.170 | 72.1 $\pm$ 7.8 <sup>*</sup>    |       | 0.140 | 78.2 $\pm$ 15.3 |       | 0.915 | 0.600 |
|                            | 30 min | HM | 85.5 $\pm$ 12.6             | 0.065 |       | 81.3 $\pm$ 14.4 | 0.441 |       | 84.6 $\pm$ 11.9             | 0.399 |       | 82.9 $\pm$ 11.5 | 0.682 |       | 86.4 $\pm$ 12.7                | 0.180 |       | 83.4 $\pm$ 11.6 | 0.334 |       | 0.878 |
|                            |        | LM | 75.7 $\pm$ 11.4             |       |       | 77.3 $\pm$ 10.7 |       |       | 80.6 $\pm$ 15.0             |       |       | 85.0 $\pm$ 15.2 |       |       | 82.5 $\pm$ 20.2                |       |       | 77.7 $\pm$ 18.6 |       |       | 0.724 |
|                            |        | HM | 88.4 $\pm$ 13.7             | 0.316 |       | 90.1 $\pm$ 17.2 | 0.803 |       | 92.1 $\pm$ 10.7             | 0.890 |       | 91.1 $\pm$ 12.2 | 0.849 |       | 94.3 $\pm$ 15.4                | 0.227 |       | 91.5 $\pm$ 13.9 | 0.469 |       | 0.925 |
|                            |        | LM | 82.0 $\pm$ 14.8             |       |       | 88.4 $\pm$ 15.6 |       |       | 92.9 $\pm$ 15.6             |       |       | 92.2 $\pm$ 16.6 |       |       | 85.9 $\pm$ 15.7                |       |       | 88.7 $\pm$ 28.5 |       |       | 0.751 |
| RP VSL ( $\mu\text{m/s}$ ) |        |    |                             |       |       |                 |       |       |                             |       |       |                 |       |       |                                |       |       |                 |       |       |       |
| 60 min                     | 5 min  | HM | 75.0 $\pm$ 14.2             | 0.410 | 0.565 | 73.4 $\pm$ 13.4 | 0.380 | 0.277 | 78.3 $\pm$ 13.2             | 0.331 | 0.295 | 74.2 $\pm$ 12.5 | 0.851 | 0.180 | 73.4 $\pm$ 14.3 <sup>*,a</sup> | 0.010 | 0.045 | 76.6 $\pm$ 12.2 | 0.087 | 0.283 | 0.850 |
|                            |        | LM | 69.3 $\pm$ 15.4             |       | 0.791 | 69.1 $\pm$ 11.5 |       | 0.065 | 73.6 $\pm$ 14.5             |       | 0.111 | 72.2 $\pm$ 11.9 |       | 0.185 | 64.3 $\pm$ 6.6 <sup>*</sup>    |       | 0.125 | 70.8 $\pm$ 14.6 |       | 0.482 | 0.588 |
|                            | 30 min | HM | 77.7 $\pm$ 14.2             | 0.132 |       | 72.6 $\pm$ 13.5 | 0.395 |       | 75.7 $\pm$ 11.9             | 0.570 |       | 74.1 $\pm$ 10.6 | 0.547 |       | 77.1 $\pm$ 12.0 <sup>ab</sup>  | 0.222 |       | 75.7 $\pm$ 11.6 | 0.261 |       | 0.879 |
|                            |        | LM | 69.1 $\pm$ 11.7             |       |       | 68.6 $\pm$ 8.7  |       |       | 72.9 $\pm$ 15.2             |       |       | 77.1 $\pm$ 15.0 |       |       | 74.8 $\pm$ 19.3                |       |       | 69.4 $\pm$ 17.3 |       |       | 0.690 |
|                            |        | HM | 80.7 $\pm$ 13.6             | 0.201 |       | 81.0 $\pm$ 17.1 | 0.867 |       | 82.4 $\pm$ 9.7              | 0.744 |       | 81.1 $\pm$ 10.8 | 0.626 |       | 85.2 $\pm$ 14.7 <sup>b</sup>   | 0.223 |       | 82.7 $\pm$ 14.0 | 0.694 |       | 0.950 |
|                            |        | LM | 73.0 $\pm$ 13.4             |       |       | 79.9 $\pm$ 15.0 |       |       | 83.9 $\pm$ 14.5             |       |       | 83.8 $\pm$ 16.1 |       |       | 77.3 $\pm$ 14.0                |       |       | 79.3 $\pm$ 25.1 |       |       | 0.686 |
| RP STR (%)                 |        |    |                             |       |       |                 |       |       |                             |       |       |                 |       |       |                                |       |       |                 |       |       |       |
| 60 min                     | 5 min  | HM | 91.9 $\pm$ 3.1 <sup>*</sup> | 0.043 | 0.507 | 90.6 $\pm$ 2.8  | 0.985 | 0.357 | 91.9 $\pm$ 3.5 <sup>a</sup> | 0.389 | 0.019 | 90.0 $\pm$ 4.1  | 0.917 | 0.628 | 88.9 $\pm$ 4.2                 | 0.715 | 0.538 | 90.4 $\pm$ 3.4  | 0.713 | 0.928 | 0.090 |
|                            |        | LM | 89.3 $\pm$ 3.8 <sup>*</sup> |       | 0.324 | 90.5 $\pm$ 3.4  |       | 0.389 | 90.7 $\pm$ 4.7              |       | 0.922 | 89.9 $\pm$ 2.9  |       | 0.835 | 89.1 $\pm$ 2.1                 |       | 0.461 | 89.9 $\pm$ 3.2  |       | 0.842 | 0.860 |
|                            | 30 min | HM | 90.6 $\pm$ 3.7              | 0.760 |       | 89.1 $\pm$ 2.5  | 0.739 |       | 89.2 $\pm$ 2.9 <sup>b</sup> | 0.391 |       | 89.2 $\pm$ 2.5  | 0.289 |       | 89.0 $\pm$ 3.4                 | 0.251 |       | 90.5 $\pm$ 2.1  | 0.220 |       | 0.376 |
|                            |        | LM | 91.1 $\pm$ 2.9              |       |       | 88.7 $\pm$ 3.6  |       |       | 90.1 $\pm$ 3.2              |       |       | 90.4 $\pm$ 3.2  |       |       | 90.4 $\pm$ 3.0                 |       |       | 89.0 $\pm$ 4.3  |       |       | 0.562 |
|                            |        | HM | 91.0 $\pm$ 2.4              | 0.105 |       | 89.5 $\pm$ 3.4  | 0.650 |       | 89.3 $\pm$ 2.9 <sup>b</sup> | 0.393 |       | 88.9 $\pm$ 2.7  | 0.190 |       | 90.1 $\pm$ 2.3                 | 0.945 |       | 90.1 $\pm$ 3.2  | 0.718 |       | 0.529 |
|                            |        | LM | 88.9 $\pm$ 3.2              |       |       | 90.1 $\pm$ 2.6  |       |       | 90.3 $\pm$ 2.7              |       |       | 90.7 $\pm$ 3.6  |       |       | 90.0 $\pm$ 2.1                 |       |       | 89.5 $\pm$ 4.2  |       |       | 0.856 |
| RP LIN (%)                 |        |    |                             |       |       |                 |       |       |                             |       |       |                 |       |       |                                |       |       |                 |       |       |       |
| 60 min                     | 5 min  | HM | 54.9 $\pm$ 9.8              | 0.057 | 0.997 | 50.6 $\pm$ 10.7 | 0.859 | 0.612 | 57.4 $\pm$ 15.2             | 0.199 | 0.097 | 50.6 $\pm$ 9.5  | 0.786 | 0.671 | 48.8 $\pm$ 10.8                | 0.591 | 0.513 | 51.8 $\pm$ 10.8 | 0.561 | 0.924 | 0.217 |
|                            |        | LM | 48.7 $\pm$ 12.2             |       | 0.898 | 49.8 $\pm$ 10.3 |       | 0.686 | 51.1 $\pm$ 11.2             |       | 0.959 | 48.4 $\pm$ 7.7  |       | 0.398 | 45.1 $\pm$ 5.9                 |       | 0.089 | 49.4 $\pm$ 11.0 |       | 0.832 | 0.781 |
|                            | 30 min | HM | 54.9 $\pm$ 12.0             | 0.558 |       | 47.7 $\pm$ 8.5  | 0.515 |       | 49.6 $\pm$ 8.5              | 0.676 |       | 48.1 $\pm$ 7.1  | 0.354 |       | 50.0 $\pm$ 8.7                 | 0.589 |       | 50.8 $\pm$ 8.3  | 0.252 |       | 0.312 |
|                            |        | LM | 50.1 $\pm$ 12.9             |       |       | 49.9 $\pm$ 8.1  |       |       | 50.8 $\pm$ 7.9              |       |       | 52.9 $\pm$ 11.8 |       |       | 50.7 $\pm$ 8.5                 |       |       | 46.9 $\pm$ 8.6  |       |       | 0.810 |
|                            |        | HM | 54.6 $\pm$ 9.9              | 0.503 |       | 51.5 $\pm$ 12.0 | 0.756 |       | 50.6 $\pm$ 8.8              | 0.199 |       | 49.2 $\pm$ 6.1  | 0.345 |       | 52.6 $\pm$ 9.9                 | 0.951 |       | 52.1 $\pm$ 10.3 | 0.290 |       | 0.791 |
|                            |        | LM | 51.4 $\pm$ 12.0             |       |       | 52.9 $\pm$ 8.6  |       |       | 51.8 $\pm$ 6.7              |       |       | 54.2 $\pm$ 12.7 |       |       | 51.2 $\pm$ 4.3                 |       |       | 48.0 $\pm$ 3.0  |       |       | 0.786 |
| RP WOB (%)                 |        |    |                             |       |       |                 |       |       |                             |       |       |                 |       |       |                                |       |       |                 |       |       |       |
| 60 min                     | 5 min  | HM | 59.2 $\pm$ 9.0              | 0.086 | 0.977 | 55.4 $\pm$ 10.4 | 0.818 | 0.614 | 61.8 $\pm$ 14.2             | 0.193 | 0.153 | 55.7 $\pm$ 9.0  | 0.722 | 0.761 | 54.3 $\pm$ 10.1                | 0.576 | 0.520 | 56.8 $\pm$ 10.3 | 0.518 | 0.875 | 0.296 |
|                            |        | LM | 54.1 $\pm$ 11.3             |       | 0.812 | 54.5 $\pm$ 9.7  |       | 0.629 | 55.9 $\pm$ 9.9              |       | 0.911 | 53.4 $\pm$ 7.1  |       | 0.335 | 50.3 $\pm$ 5.7                 |       | 0.066 | 54.3 $\pm$ 10.4 |       | 0.881 | 0.786 |
|                            | 30 min | HM | 59.9 $\pm$ 10.8             | 0.412 |       | 53.1 $\pm$ 8.1  | 0.405 |       | 55.2 $\pm$ 8.1              | 0.751 |       | 53.6 $\pm$ 6.7  | 0.407 |       | 55.7 $\pm$ 8.1                 | 0.857 |       | 55.7 $\pm$ 8.1  | 0.271 |       | 0.318 |
|                            |        | LM | 54.6 $\pm$ 12.5             |       |       | 55.9 $\pm$ 8.5  |       |       | 56.1 $\pm$ 7.0              |       |       | 57.9 $\pm$ 10.8 |       |       | 55.8 $\pm$ 7.8                 |       |       | 52.3 $\pm$ 7.2  |       |       | 0.788 |
|                            |        | HM | 59.6 $\pm$ 9.5              | 0.651 |       | 56.8 $\pm$ 11.2 | 0.755 |       | 56.3 $\pm$ 8.3              | 0.369 |       | 55.1 $\pm$ 5.6  | 0.529 |       | 58.0 $\pm$ 10.1                | 0.951 |       | 57.3 $\pm$ 9.5  | 0.277 |       | 0.862 |
|                            |        | LM | 57.4 $\pm$ 12.3             |       |       | 58.2 $\pm$ 8.2  |       |       | 57.1 $\pm$ 5.9              |       |       | 59.3 $\pm$ 12.0 |       |       | 56.6 $\pm$ 4.1                 |       |       | 53.5 $\pm$ 2.2  |       |       | 0.677 |

Supplementary Table S3. Continued...

| RP ALH (μm) |    |                            |        |       |                         |       |       |                          |       |       |                         |       |       |                         |       |       |                         |       |       |       |  |  |  |
|-------------|----|----------------------------|--------|-------|-------------------------|-------|-------|--------------------------|-------|-------|-------------------------|-------|-------|-------------------------|-------|-------|-------------------------|-------|-------|-------|--|--|--|
| 5 min       | HM | 3.3 ± 0.7                  | 0.385  | 0.431 | 4.9 ± 4.3               | 0.307 | 0.675 | 3.4 ± 1.1 <sup>a</sup>   | 0.165 | 0.018 | 3.7 ± 0.8 <sup>a</sup>  | 0.213 | 0.026 | 4.1 ± 1.3               | 0.677 | 0.983 | 3.7 ± 0.9               | 0.793 | 0.313 | 0.179 |  |  |  |
|             | LM | 4.0 ± 0.9                  |        | 0.401 | 3.5 ± 1.0               |       | 0.556 | 3.9 ± 0.9                |       | 0.018 | 4.0 ± 1.0               |       | 0.989 | 3.9 ± 0.9               |       | 0.883 | 3.8 ± 1.2               |       | 0.733 | 0.832 |  |  |  |
| 30 min      | HM | 3.6 ± 0.8                  | 0.725  |       | 4.1 ± 1.0               | 0.582 |       | 4.1 ± 0.8 <sup>b</sup>   | 0.250 |       | 4.2 ± 0.9 <sup>ab</sup> | 0.573 |       | 4.1 ± 0.9               | 0.636 |       | 4.0 ± 0.8               | 0.780 |       | 0.556 |  |  |  |
|             | LM | 3.5 ± 0.8                  |        |       | 3.9 ± 1.0               |       |       | 3.7 ± 0.7                |       |       | 3.9 ± 1.1               |       |       | 4.0 ± 1.0               |       |       | 3.9 ± 1.0               |       |       | 0.886 |  |  |  |
| 60 min      | HM | 3.6 ± 0.7                  | 0.987  |       | 4.1 ± 0.9               | 0.489 |       | 4.3 ± 0.9 <sup>b</sup>   | 0.512 |       | 4.5 ± 0.8 <sup>b</sup>  | 0.975 |       | 4.1 ± 0.8               | 0.903 |       | 4.3 ± 1.2               | 0.690 |       | 0.197 |  |  |  |
|             | LM | 3.6 ± 1.0                  |        |       | 3.8 ± 0.8               |       |       | 4.2 ± 0.8                |       |       | 4.0 ± 1.2               |       |       | 4.1 ± 0.7               |       |       | 4.2 ± 1.2               |       |       | 0.709 |  |  |  |
| RP BCF (Hz) |    |                            |        |       |                         |       |       |                          |       |       |                         |       |       |                         |       |       |                         |       |       |       |  |  |  |
| 5 min       | HM | 27.1 ± 5.0 <sup>***</sup>  | <0.001 | 0.452 | 25.2 ± 3.2              | 0.745 | 0.289 | 25.7 ± 3.9 <sup>a</sup>  | 0.059 | 0.039 | 26.6 ± 4.7 <sup>a</sup> | 0.217 | 0.010 | 23.5 ± 4.6              | 0.817 | 0.342 | 25.3 ± 5.4              | 0.18  | 0.324 | 0.253 |  |  |  |
|             | LM | 16.3 ± 9.0 <sup>***a</sup> | 0.040  |       | 26.8 ± 6.3 <sup>b</sup> |       | 0.102 | 22.2 ± 6.3 <sup>b</sup>  |       | 0.799 | 23.3 ± 4.4 <sup>b</sup> |       | 0.383 | 23.1 ± 4.4 <sup>b</sup> |       | 0.687 | 22.9 ± 3.7 <sup>b</sup> |       | 0.724 | 0.020 |  |  |  |
| 30 min      | HM | 25.5 ± 6.4                 | 0.847  |       | 23.0 ± 4.0              | 0.959 |       | 22.8 ± 3.3 <sup>b</sup>  | 0.609 |       | 22.7 ± 3.0 <sup>b</sup> | 0.606 |       | 23.3 ± 4.0              | 0.444 |       | 23.0 ± 3.5              | 0.269 |       | 0.450 |  |  |  |
|             | LM | 24.9 ± 6.4 <sup>b</sup>    |        |       | 21.2 ± 8.0              |       |       | 23.5 ± 4.6               |       |       | 23.2 ± 2.6              |       |       | 22.2 ± 3.7              |       |       | 22.3 ± 6.3              |       |       | 0.450 |  |  |  |
| 60 min      | HM | 24.5 ± 4.6                 | 0.630  |       | 23.8 ± 4.0              | 0.314 |       | 23.1 ± 4.0 <sup>ab</sup> | 0.630 |       | 23.2 ± 3.0 <sup>b</sup> | 0.207 |       | 25.3 ± 4.2 <sup>c</sup> | 0.038 |       | 23.4 ± 5.2              | 0.320 |       | 0.689 |  |  |  |
|             | LM | 25.8 ± 7.1 <sup>ab</sup>   |        |       | 25.5 ± 3.8              |       |       | 22.2 ± 5.9               |       |       | 21.2 ± 4.4              |       |       | 21.7 ± 2.8 <sup>c</sup> |       |       | 21.1 ± 4.8              |       |       | 0.165 |  |  |  |

ALH, average path velocity; BCF, beat cross frequency; CAP, capacitating-HTF; HTF, human tubal fluid; HM, high motile subpopulation; LIN, linearity; LM, low motile subpopulation; MP, medium-progressive; min, minutes; NP, non-progressive; PRL, prolactin; Prog, progressive; RP, rapid-progressive; SD, standard deviation; SP *p*, t-test between subpopulations; STR, straightness; TP *p*, t test between time points; VAP, average path velocity; VCL, curvilinear velocity; VSL, straight-line velocity; WOB, wobble. Values labelled in bold with an asterisks in the same column were significantly different between the HM and LM subpopulations for individual media and SCA parameters (**\**p* < 0.05**, **\*\**p* < 0.01** and **\*\*\**p* < 0.001**). Values labelled in bold and red with an asterisks in the same column were significantly different between the 5 and 30 minutes for individual subpopulations and media (**\**p* < 0.05** and **\*\**p* < 0.01**). Student's t-test was used or the Mann-Whitney test when normal distribution was absent. <sup>a, b, c, d</sup> Values labelled with different superscript letters in the same row were significantly different between the various media for individual subpopulations and SCA parameters. One-way ANOVA was used for parametric distributions or Kruskal-Wallis test for non-parametric distributions.



**Supplementary Table S4** - Percentage hyperactivation in both low motile and high motile sperm subpopulations after treatment with HTF, CAP, HD-C, 1.98  $\mu$ M progesterone, 3.96  $\mu$ M progesterone, 19.8  $\mu$ M progesterone and 11 mM myo-inositol at 5, 15, 30, 45 and 60 minutes (mean $\pm$ SD) (n=20).

| HTF        |                            |    |        | CAP                       |  | HD-C  |                          | 1.98 μM PRG |       | 3.96 μM PRG               |   | 19.8 μM PRG |                           | 11 mM MYO |       | ANOVA                     |  |       |                            |  |       |       |
|------------|----------------------------|----|--------|---------------------------|--|-------|--------------------------|-------------|-------|---------------------------|---|-------------|---------------------------|-----------|-------|---------------------------|--|-------|----------------------------|--|-------|-------|
| Mean ± SD  |                            | SP | p      | Mean ± SD                 |  | SP    | p                        | Mean ± SD   |       | SP                        | p | Mean ± SD   |                           | SP        | p     |                           |  |       |                            |  |       |       |
| 5 minutes  |                            |    |        |                           |  |       |                          |             |       |                           |   |             |                           |           |       |                           |  |       |                            |  |       |       |
| HM         | 18.0 ± 11.5 <sup>a</sup>   |    | 0.081  | 29.8 ± 17.1 <sup>ab</sup> |  | 0.133 | 42.4 ± 20.1 <sup>b</sup> |             | 0.163 | 29.8 ± 17.8 <sup>ab</sup> |   | 0.185       | 37.9 ± 18.8 <sup>b</sup>  |           | 0.210 | 35.67 ± 17.8 <sup>b</sup> |  | 0.095 | 36.1 ± 17.0 <sup>*b</sup>  |  | 0.022 | 0.005 |
| LM         | 10.8 ± 9.5 <sup>a</sup>    |    |        | 22.6 ± 14.7 <sup>ab</sup> |  |       | 33.5 ± 19.3 <sup>b</sup> |             |       | 23.2 ± 16.9 <sup>ab</sup> |   |             | 30.2 ± 19.5 <sup>b</sup>  |           |       | 26.0 ± 18.0 <sup>ab</sup> |  |       | 23.9 ± 16.1 <sup>*ab</sup> |  |       | 0.009 |
| 15 minutes |                            |    |        |                           |  |       |                          |             |       |                           |   |             |                           |           |       |                           |  |       |                            |  |       |       |
| HM         | 25.0 ± 13.3 <sup>***</sup> |    | <0.001 | 35.4 ± 17.2               |  | 0.085 | 43.1 ± 16.1              |             | 0.217 | 34.5 ± 16.7               |   | 0.178       | 41.0 ± 16.7 <sup>*</sup>  |           | 0.022 | 37.1 ± 16.6               |  | 0.060 | 35.6 ± 16.7                |  | 0.149 | 0.067 |
| LM         | 8.8 ± 5.8 <sup>***a</sup>  |    |        | 26.2 ± 15.8 <sup>b</sup>  |  |       | 35.7 ± 21.1 <sup>b</sup> |             |       | 26.2 ± 21.4 <sup>b</sup>  |   |             | 27.7 ± 18.7 <sup>*b</sup> |           |       | 27.0 ± 21.7 <sup>b</sup>  |  |       | 27.8 ± 16.9 <sup>b</sup>   |  |       | 0.003 |
| 30 minutes |                            |    |        |                           |  |       |                          |             |       |                           |   |             |                           |           |       |                           |  |       |                            |  |       |       |
| HM         | 24.1 ± 11.4 <sup>***</sup> |    | <0.001 | 35.2 ± 17.9               |  | 0.082 | 35.9 ± 16.1              |             | 0.230 | 29.4 ± 16.0               |   | 0.404       | 34.7 ± 16.8               |           | 0.091 | 30.8 ± 17.0               |  | 0.151 | 27.6 ± 13.7                |  | 0.414 | 0.245 |
| LM         | 8.64 ± 8.5 <sup>***</sup>  |    |        | 25.6 ± 16.3               |  |       | 28.5 ± 21.7              |             |       | 24.5 ± 20.5               |   |             | 25.1 ± 18.2               |           |       | 23.5 ± 20.0               |  |       | 23.3 ± 18.9                |  |       | 0.100 |
| 45 minutes |                            |    |        |                           |  |       |                          |             |       |                           |   |             |                           |           |       |                           |  |       |                            |  |       |       |
| HM         | 17.2 ± 9.9 <sup>***</sup>  |    | <0.001 | 27.9 ± 12.5               |  | 0.079 | 27.1 ± 14.9              |             | 0.605 | 25.1 ± 16.7               |   | 0.122       | 30.4 ± 15.2               |           | 0.085 | 23.9 ± 12.2               |  | 0.176 | 23.8 ± 11.9                |  | 0.599 | 0.172 |
| LM         | 4.0 ± 6.6 <sup>***a</sup>  |    |        | 20.2 ± 14.6 <sup>b</sup>  |  |       | 24.4 ± 17.7 <sup>b</sup> |             |       | 17.7 ± 16.9 <sup>b</sup>  |   |             | 21.7 ± 16.2 <sup>b</sup>  |           |       | 19.4 ± 18.8 <sup>b</sup>  |  |       | 21.2 ± 18.1 <sup>b</sup>   |  |       | 0.008 |
| 60 minutes |                            |    |        |                           |  |       |                          |             |       |                           |   |             |                           |           |       |                           |  |       |                            |  |       |       |
| HM         | 13.8 ± 9.8 <sup>**</sup>   |    | 0.005  | 21.0 ± 14.8               |  | 0.212 | 21.7 ± 12.7              |             | 0.568 | 21.1 ± 12.3               |   | 0.098       | 25.5 ± 14.7 <sup>*</sup>  |           | 0.021 | 20.8 ± 12.1               |  | 0.050 | 20.1 ± 10.2                |  | 0.133 | 0.304 |
| LM         | 3.0 ± 7.0 <sup>**a</sup>   |    |        | 16.0 ± 15.1 <sup>b</sup>  |  |       | 19.4 ± 13.3 <sup>b</sup> |             |       | 15.46 ± 17.5 <sup>b</sup> |   |             | 14.8 ± 13.9 <sup>*b</sup> |           |       | 12.7 ± 12.9 <sup>b</sup>  |  |       | 14.7 ± 12.0 <sup>b</sup>   |  |       | 0.024 |

CAP, capacitating-HTF; HD-C, HD capacitating medium; HM, high motile; HTF, human tubal fluid; LM, low motile; min, minutes; MYO, myo-inositol; PRG, progesterone; SD, standard deviation and SP *p*, t test between subpopulations. <sup>a, b, c, d</sup> Values labelled with different superscript letters in the same row were significantly different between the various media for individual subpopulations and time points. One-way ANOVA for parametric distributions or Kruskal-Wallis test for non-parametric distributions was used. Values labelled with an asterisks in the same column were significantly different between the HM and LM subpopulations for individual media and time points (\**p* < 0.05, \*\**p* < 0.01 and \*\*\**p* < 0.001). Student's t-test was used or the Mann-Whitney test when normal distribution was void.

**Supplementary Table S5** - Percentage hyperactivation in both low motile and high motile sperm subpopulations after treatment with HTF, CAP, 20 nM, 100 nM and 1  $\mu$ M dopamine (mean $\pm$ SD) (n=20).

|                   | HTF                            |                | CAP                              |                | 20 nM DOPA                      |              | 100 nM DOPA                    |              | 1 $\mu$ M DOPA                |              | ANOVA          |
|-------------------|--------------------------------|----------------|----------------------------------|----------------|---------------------------------|--------------|--------------------------------|--------------|-------------------------------|--------------|----------------|
|                   | Mean $\pm$ SD                  | SP <i>p</i>    | Mean $\pm$ SD                    | SP <i>p</i>    | Mean $\pm$ SD                   | SP <i>p</i>  | Mean $\pm$ SD                  | SP <i>p</i>  | Mean $\pm$ SD                 | SP <i>p</i>  |                |
| <b>5 minutes</b>  |                                |                |                                  |                |                                 |              |                                |              |                               |              |                |
| <b>HM</b>         | 11.0 $\pm$ 15.0 <sup>a</sup>   | 0.544          | 19.7 $\pm$ 18.0 <sup>a</sup>     | 0.054          | 35.7 $\pm$ 21.9 <sup>**b</sup>  | <b>0.004</b> | 31.3 $\pm$ 15.4 <sup>b</sup>   | 0.158        | 35.2 $\pm$ 21.0 <sup>*b</sup> | <b>0.028</b> | < <b>0.001</b> |
| <b>LM</b>         | 6.8 $\pm$ 7.4 <sup>a</sup>     |                | 11.9 $\pm$ 12.2 <sup>ac</sup>    |                | 19.0 $\pm$ 15.0 <sup>**bc</sup> |              | 24.0 $\pm$ 16.9 <sup>b</sup>   |              | 22.1 $\pm$ 15.1 <sup>*b</sup> |              | < <b>0.001</b> |
| <b>15 minutes</b> |                                |                |                                  |                |                                 |              |                                |              |                               |              |                |
| <b>HM</b>         | 17.8 $\pm$ 13.7 <sup>**a</sup> | <b>0.003</b>   | 29.4 $\pm$ 17.3 <sup>**b</sup>   | <b>0.006</b>   | 35.1 $\pm$ 20.4 <sup>**b</sup>  | <b>0.009</b> | 31.3 $\pm$ 12.5 <sup>*b</sup>  | <b>0.028</b> | 39.5 $\pm$ 18.2 <sup>*b</sup> | <b>0.015</b> | <b>0.001</b>   |
| <b>LM</b>         | 6.9 $\pm$ 6.8 <sup>**a</sup>   |                | 15.7 $\pm$ 11.9 <sup>**b</sup>   |                | 18.9 $\pm$ 12.6 <sup>**bc</sup> |              | 21.6 $\pm$ 14.2 <sup>*bc</sup> |              | 26.7 $\pm$ 13.4 <sup>*c</sup> |              | < <b>0.001</b> |
| <b>30 minutes</b> |                                |                |                                  |                |                                 |              |                                |              |                               |              |                |
| <b>HM</b>         | 23.1 $\pm$ 14.0 <sup>***</sup> | < <b>0.001</b> | 33.6 $\pm$ 19.4 <sup>***</sup>   | < <b>0.001</b> | 33.6 $\pm$ 18.4 <sup>*</sup>    | <b>0.010</b> | 33.6 $\pm$ 15.6 <sup>*</sup>   | <b>0.011</b> | 37.9 $\pm$ 19.2               | 0.060        | 0.105          |
| <b>LM</b>         | 6.6 $\pm$ 9.3 <sup>***a</sup>  |                | 13.7 $\pm$ 12.0 <sup>***ab</sup> |                | 20.5 $\pm$ 11.7 <sup>*bc</sup>  |              | 21.4 $\pm$ 13.3 <sup>*bc</sup> |              | 24.5 $\pm$ 15.3 <sup>c</sup>  |              | < <b>0.001</b> |
| <b>45 minutes</b> |                                |                |                                  |                |                                 |              |                                |              |                               |              |                |
| <b>HM</b>         | 12.0 $\pm$ 13.1 <sup>a</sup>   | 0.146          | 24.8 $\pm$ 15.6 <sup>**ab</sup>  | <b>0.002</b>   | 20.8 $\pm$ 16.0 <sup>ab</sup>   | 0.329        | 24.2 $\pm$ 16.8 <sup>b</sup>   | 0.119        | 31.8 $\pm$ 16.3 <sup>b</sup>  | 0.056        | <b>0.003</b>   |
| <b>LM</b>         | 5.9 $\pm$ 8.0 <sup>a</sup>     |                | 10.3 $\pm$ 10.9 <sup>**ab</sup>  |                | 16.7 $\pm$ 12.1 <sup>bc</sup>   |              | 18.2 $\pm$ 15.8 <sup>bc</sup>  |              | 21.7 $\pm$ 16.1 <sup>c</sup>  |              | <b>0.001</b>   |
| <b>60 minutes</b> |                                |                |                                  |                |                                 |              |                                |              |                               |              |                |
| <b>HM</b>         | 9.7 $\pm$ 12.1 <sup>a</sup>    | 0.078          | 22.2 $\pm$ 12.1 <sup>**ab</sup>  | <b>0.001</b>   | 21.2 $\pm$ 16.0 <sup>b</sup>    | 0.078        | 18.0 $\pm$ 17.1 <sup>ab</sup>  | 0.430        | 23.4 $\pm$ 18.0 <sup>b</sup>  | 0.067        | <b>0.041</b>   |
| <b>LM</b>         | 4.7 $\pm$ 8.9                  |                | 9.6 $\pm$ 10.7 <sup>**</sup>     |                | 14.3 $\pm$ 12.0                 |              | 14.4 $\pm$ 14.9                |              | 13.0 $\pm$ 12.5               |              | 0.056          |

CAP, capacitating-HTF; DOPA, dopamine; HM, high motile; HTF, human tubal fluid; LM, low motile; min, minutes; SD, standard deviation and SP *p*, t test between subpopulations. <sup>a, b, c, d</sup> Values labelled with different superscript letters in the same row were significantly different between the various media for individual subpopulations and time points. One-way ANOVA for parametric distributions or Kruskal-Wallis test for non-parametric distributions was used. Values labelled with an asterisks in the same column were significantly different between the HM and LM subpopulations for individual media and time points (\**p* < 0.05, \*\**p* < 0.01 and \*\*\**p* < 0.001). Student's t-test was used or the Mann-Whitney test when normal distribution was void.

**Supplementary Table S6** - Percentage hyperactivation in both low motile and high motile sperm subpopulations after treatment with HTF, CAP, 50 ng/mL, 100 ng/mL, 250 ng/mL and 500 ng/mL prolactin at 5, 15, 30, 45 and 60 minutes (mean±SD) (n=20).

| HTF        |                             |    |        | CAP                         |  | 50 ng/mL PRL |                             | 100 ng/mL PRL |       | 250 ng/mL PRL             |   | 500 ng/mL PRL |                            | ANOVA |       |                            |  |       |        |
|------------|-----------------------------|----|--------|-----------------------------|--|--------------|-----------------------------|---------------|-------|---------------------------|---|---------------|----------------------------|-------|-------|----------------------------|--|-------|--------|
| Mean ± SD  |                             | SP | p      | Mean ± SD                   |  | SP           | p                           | Mean ± SD     |       | SP                        | p | Mean ± SD     |                            |       | SP    | p                          |  |       |        |
| 5 minutes  |                             |    |        |                             |  |              |                             |               |       |                           |   |               |                            |       |       |                            |  |       |        |
| HM         | 18.9 ± 13.7***              |    | <0.001 | 29.6 ± 17.4**               |  | 0.003        | 26.4 ± 18.1                 |               | 0.451 | 29.7 ± 18.3               |   | 0.354         | 28.0 ± 19.1                |       | 0.132 | 34.0 ± 18.6*               |  | 0.040 | 0.091  |
| LM         | 7.9 ± 9.5*** <sup>a</sup>   |    |        | 15.0 ± 13.8** <sup>ab</sup> |  |              | 22.4 ± 18.1 <sup>b</sup>    |               |       | 22.0 ± 17.6 <sup>b</sup>  |   |               | 18.9 ± 18.7 <sup>b</sup>   |       |       | 23.6 ± 15.3* <sup>b</sup>  |  |       | 0.005  |
| 15 minutes |                             |    |        |                             |  |              |                             |               |       |                           |   |               |                            |       |       |                            |  |       |        |
| HM         | 22.3 ± 8.2** <sup>a</sup>   |    | 0.001  | 34.5 ± 14.8** <sup>b</sup>  |  | 0.003        | 36.8 ± 19.7 <sup>b</sup>    |               | 0.155 | 32.2 ± 18.2 <sup>b</sup>  |   | 0.967         | 33.3 ± 18.9 <sup>b</sup>   |       | 0.302 | 33.9 ± 17.0 <sup>b</sup>   |  | 0.318 | 0.029  |
| LM         | 11.5 ± 11.6** <sup>a</sup>  |    |        | 21.1 ± 14.5** <sup>b</sup>  |  |              | 28.9 ± 18.0 <sup>b</sup>    |               |       | 32.5 ± 21.0 <sup>b</sup>  |   |               | 26.7 ± 20.1 <sup>b</sup>   |       |       | 29.1 ± 16.4 <sup>b</sup>   |  |       | 0.001  |
| 30 minutes |                             |    |        |                             |  |              |                             |               |       |                           |   |               |                            |       |       |                            |  |       |        |
| HM         | 21.3 ± 10.7*** <sup>a</sup> |    | <0.001 | 35.3 ± 17.7** <sup>ab</sup> |  | 0.001        | 38.2 ± 18.5** <sup>b</sup>  |               | 0.009 | 33.6 ± 18.2 <sup>b</sup>  |   | 0.380         | 34.4 ± 21.6 <sup>ab</sup>  |       | 0.410 | 32.9 ± 17.5 <sup>b</sup>   |  | 0.155 | 0.026  |
| LM         | 9.5 ± 10.1*** <sup>a</sup>  |    |        | 19.6 ± 13.8** <sup>b</sup>  |  |              | 24.9 ± 15.6** <sup>bc</sup> |               |       | 28.8 ± 19.2 <sup>bc</sup> |   |               | 29.7 ± 17.6 <sup>c</sup>   |       |       | 25.4 ± 18.3 <sup>bc</sup>  |  |       | <0.001 |
| 45 minutes |                             |    |        |                             |  |              |                             |               |       |                           |   |               |                            |       |       |                            |  |       |        |
| HM         | 16.1 ± 10.7* <sup>a</sup>   |    | 0.014  | 26.5 ± 15.9* <sup>b</sup>   |  | 0.012        | 32.5 ± 16.8* <sup>b</sup>   |               | 0.017 | 29.0 ± 14.4 <sup>b</sup>  |   | 0.642         | 35.1 ± 18.0* <sup>b</sup>  |       | 0.017 | 29.4 ± 15.3 <sup>b</sup>   |  | 0.188 | 0.001  |
| LM         | 8.7 ± 10.3* <sup>a</sup>    |    |        | 16.1 ± 11.8* <sup>ab</sup>  |  |              | 21.3 ± 14.8* <sup>b</sup>   |               |       | 25.6 ± 17.7 <sup>b</sup>  |   |               | 23.9 ± 12.9* <sup>b</sup>  |       |       | 23.6 ± 14.6 <sup>b</sup>   |  |       | <0.001 |
| 60 minutes |                             |    |        |                             |  |              |                             |               |       |                           |   |               |                            |       |       |                            |  |       |        |
| HM         | 17.7 ± 11.9** <sup>a</sup>  |    | 0.001  | 25.4 ± 15.4* <sup>ab</sup>  |  | 0.015        | 31.0 ± 16.6* <sup>ab</sup>  |               | 0.010 | 26.0 ± 12.9 <sup>ab</sup> |   | 0.692         | 30.7 ± 19.6** <sup>b</sup> |       | 0.008 | 28.8 ± 18.0* <sup>ab</sup> |  | 0.016 | 0.049  |
| LM         | 7.0 ± 9.5** <sup>a</sup>    |    |        | 14.8 ± 10.8* <sup>b</sup>   |  |              | 19.8 ± 12.3* <sup>b</sup>   |               |       | 24.4 ± 15.0 <sup>b</sup>  |   |               | 17.1 ± 14.6** <sup>b</sup> |       |       | 17.9 ± 11.9* <sup>b</sup>  |  |       | <0.001 |

CAP, capacitating-HTF; HM, high motile; HTF, human tubal fluid; LM, low motile; min, minutes; PRL, prolactin; SD, standard deviation and SP *p*, t test between subpopulations. <sup>a, b, c, d</sup> Values labelled with different superscript letters in the same row were significantly different between the various media for individual subpopulations and time points. One-way ANOVA for parametric distributions or Kruskal-Wallis test for non-parametric distributions was used. Values labelled with an asterisks in the same column were significantly different between the HM and LM subpopulations for individual media and time points (\**p* < 0.05, \*\**p* < 0.01 and \*\*\**p* < 0.001). Student's t-test was used or the Mann-Whitney test when normal distribution was void.



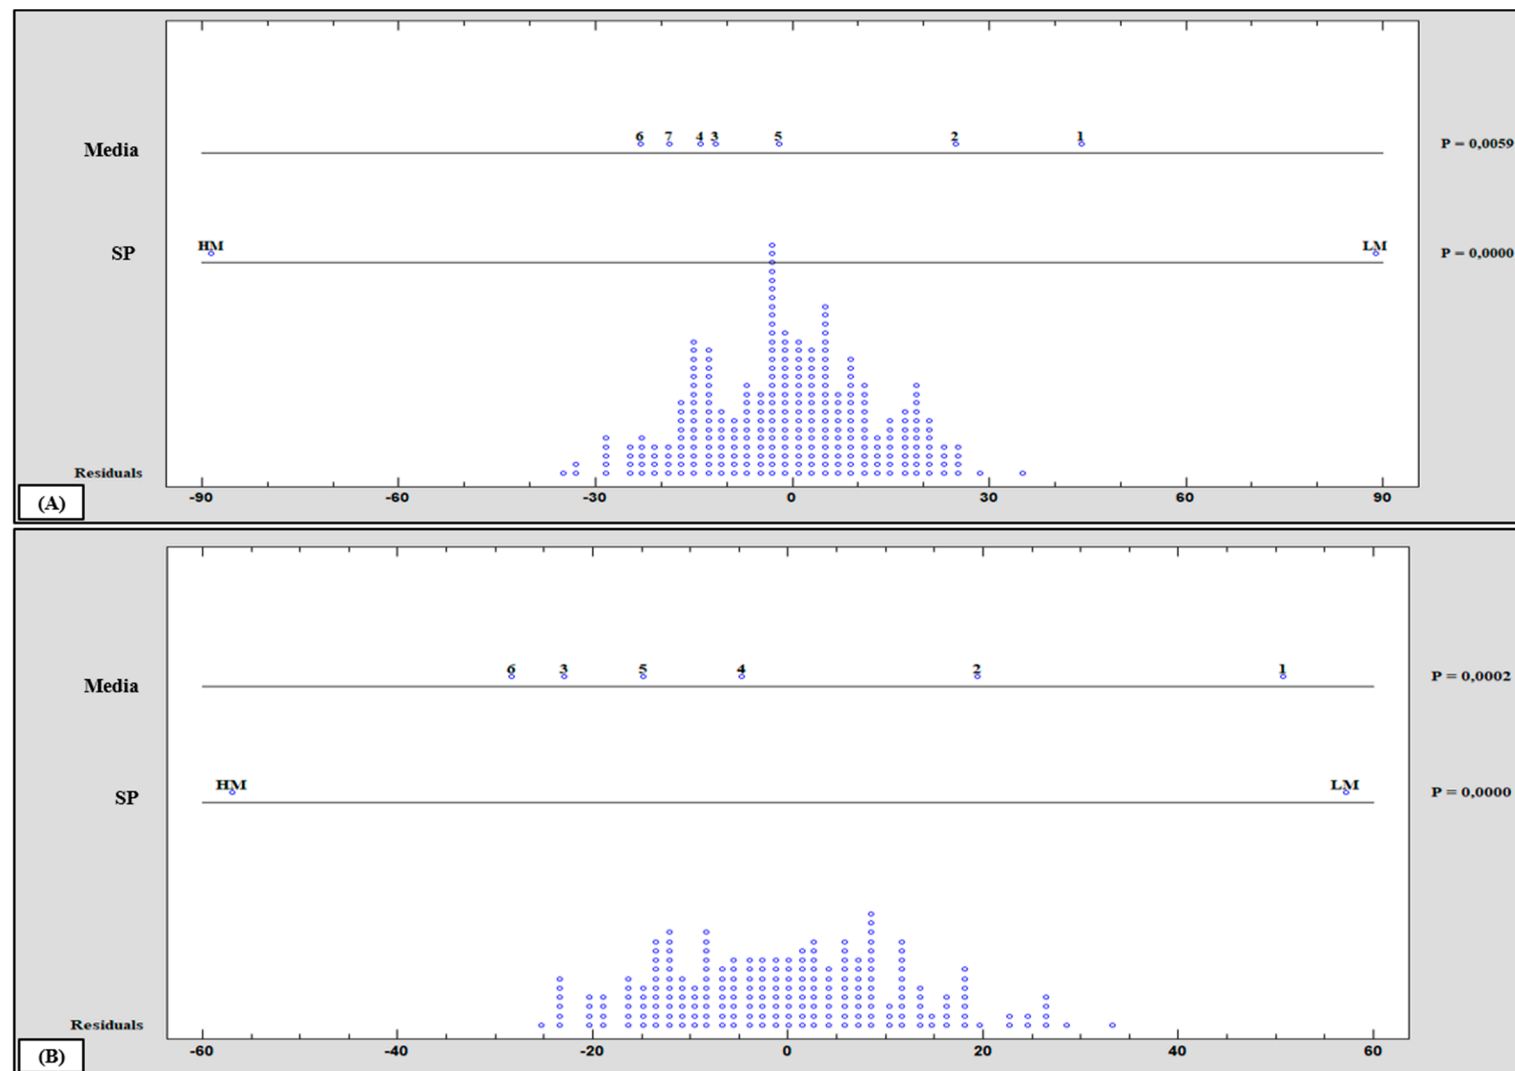

**Supplementary Figure S1.** Multifactorial graphical ANOVA of the pooled data from the high motile (HM) and low motile (LM) sperm subpopulations percentage reactive oxygen species (ROS) positive spermatozoa. **(A)** Multifactorial graphical ANOVA displaying the significant interactions of subpopulations and media on ROS percentages after treatment with HTF (1), CAP (2), HD-C (3), 1.98  $\mu$ M PRG (4), 3.96  $\mu$ M PRG (5), 19.8  $\mu$ M PRG (6) and 11 mM MYO (7). **(B)** Multifactorial graphical ANOVA displaying the significant interactions of subpopulations and media on ROS percentages after treatment with HTF (1), CAP (2), 50 ng/mL PRL (3) 100 ng/mL PRL (4), 250 ng/mL PRL (5) and 500 ng/mL PRL (6) The Graphical ANOVA plot shows the effects of each factor scaled so that they can be compared to the variability of the residuals. For each factor, the deviations of the adjusted level means from the estimated grand mean are displayed. Any factor that shows considerably larger variability than the residuals is likely to be an important factor. Student-Newman-Keuls was used for the post hoc test. ANOVA, analysis of variance; CAP, capacitating-HTF; HD-C, HD capacitation medium; HM, high motile subpopulation; HTF, human tubal fluid; LM, low motile subpopulation; MYO, myo-inositol; PRG, progesterone; PRL, prolactin.; ROS, positive reactive oxygen species

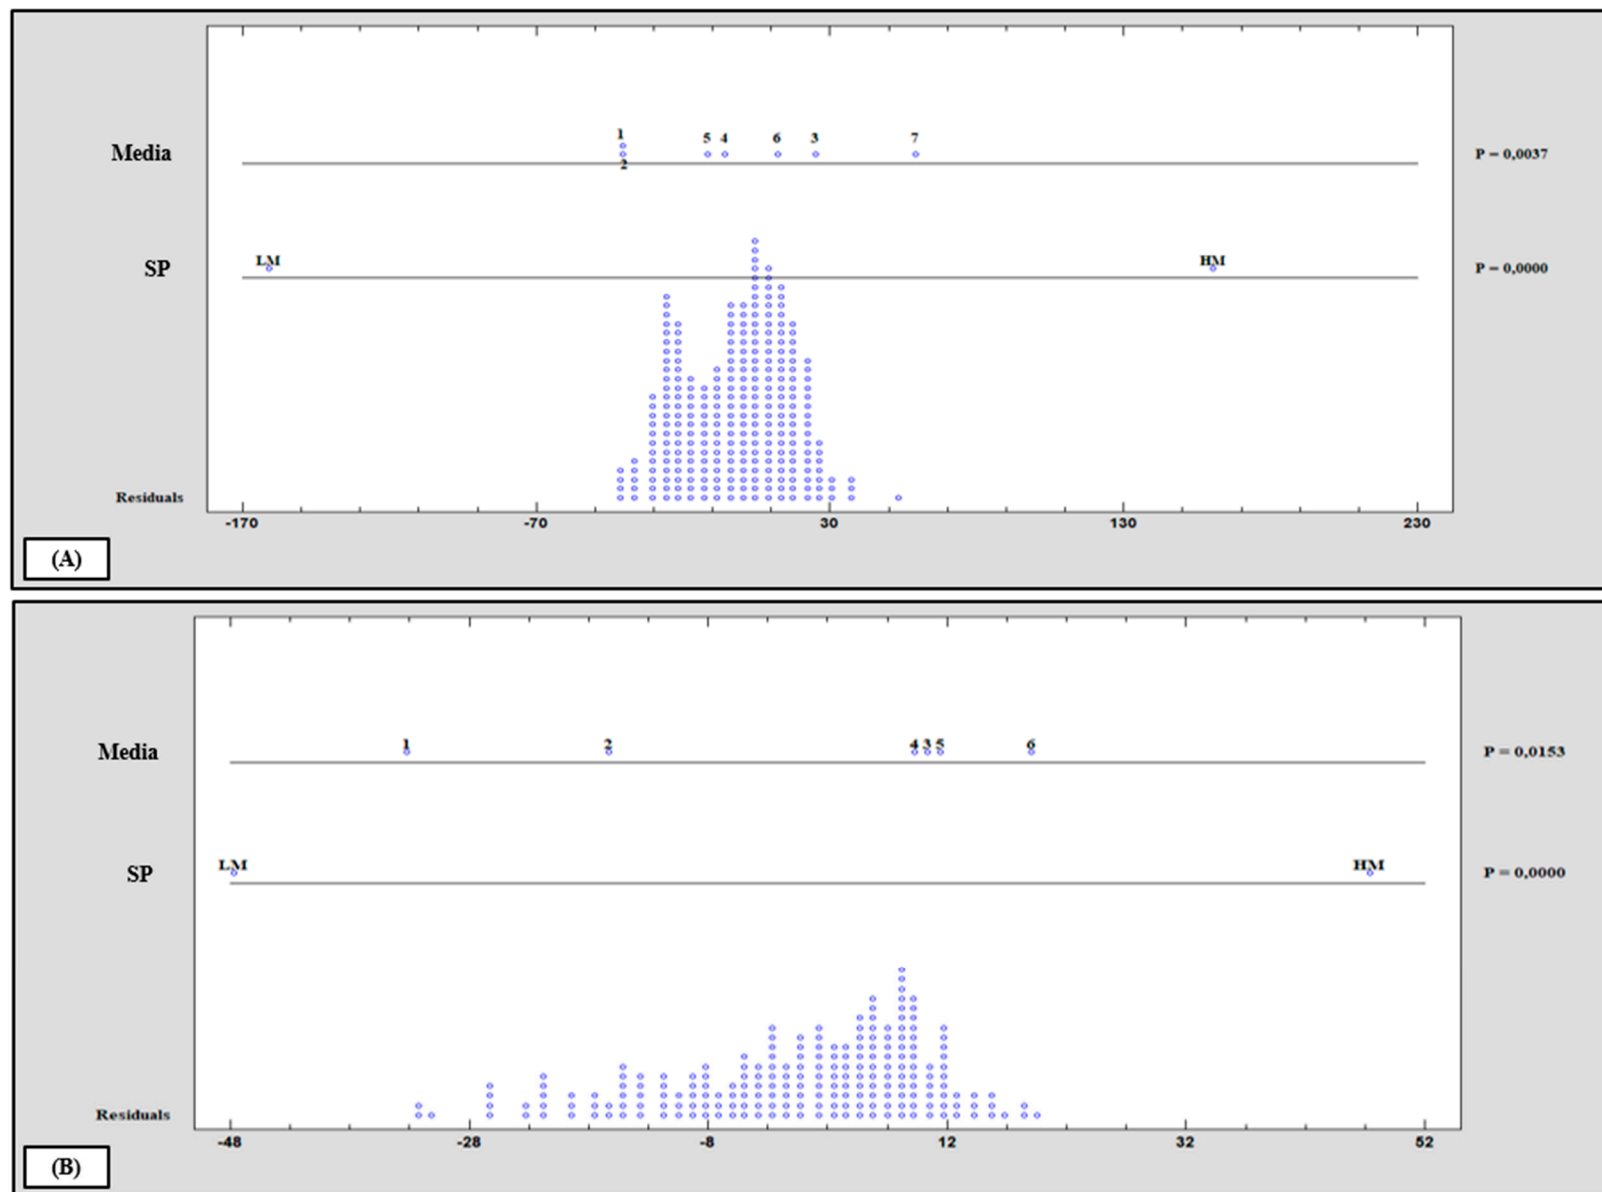

**Supplementary Figure S2.** Multifactorial graphical ANOVA of the pooled data from the high motile (HM) and low motile (LM) sperm subpopulations percentage intact mitochondrial membrane potential (MMP). **(A)** Multifactorial graphical ANOVA displaying the significant interactions of subpopulations and media on MMP intactness percentages after treatment with HTF (1), CAP (2), HD-C (3), 1.98  $\mu$ M PRG (4), 3.96  $\mu$ M PRG (5), 19.8  $\mu$ M PRG (6) and 11 mM MYO (7). **(B)** Multifactorial graphical ANOVA displaying the significant interactions of subpopulations and media on MMP intactness percentages after treatment with HTF (1), CAP (2), 50 ng/mL PRL (3) 100 ng/mL PRL (4), 250 ng/mL PRL (5) and 500 ng/mL PRL (6). The Graphical ANOVA plot shows the effects of each factor scaled so that they can be compared to the variability of the residuals. For each factor, the deviations of the adjusted level means from the estimated grand mean are displayed. Any factor that shows considerably larger variability than the residuals is likely to be an important factor. Student-Newman-Keuls was used for the post hoc test. ANOVA, analysis of variance; CAP, capacitating-HTF; HD-C, HD capacitation medium; HM, high motile subpopulation; HTF, human tubal fluid; LM, low motile subpopulation; MMP, mitochondrial membrane intactness; MYO, myo-inositol; PRG, progesterone; PRL, prolactin and SP, subpopulations.

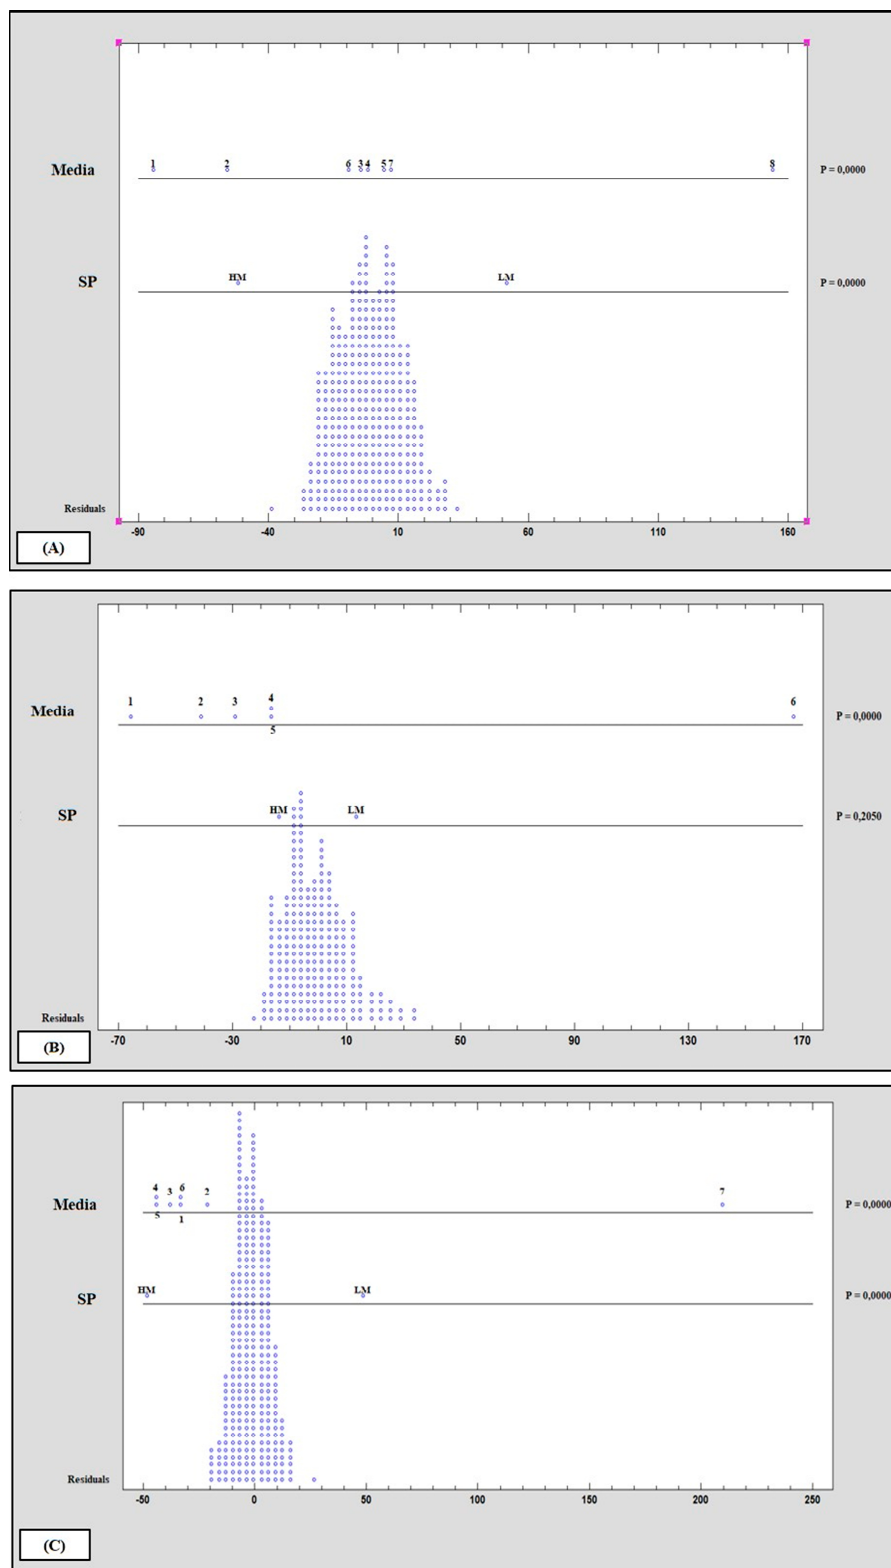

**Supplementary Figure S3.** Multifactorial graphical ANOVA of the pooled data from the high motile (HM) and low motile (LM) sperm subpopulations percentage acrosome reaction (AR). **(A)** Multifactorial graphical ANOVA displaying the significant interactions of subpopulations and media on AR percentages after treatment with HTF (1), CAP (2), HD-C (3), 1.98  $\mu$ M PRG (4), 3.96  $\mu$ M PRG (5), 19.8  $\mu$ M PRG (6), 11 mM MYO (7) and Ca-ionophore (8). **(B)** Multifactorial graphical ANOVA displaying the significant interactions of subpopulations and media on AR percentages after treatment with HTF (1), CAP (2), 20 nM DOPA (3) 100 nM DOPA (4), 1  $\mu$ M DOPA (5) and Ca-ionophore (6). **(C)** Multifactorial graphical ANOVA displaying the significant interactions of subpopulations and media on AR percentages after treatment with HTF (1), CAP (2), 50 ng/mL PRL (3) 100 ng/mL PRL (4), 250 ng/mL PRL (5), 500 ng/mL PRL (6) and Ca-ionophore (7). The Graphical ANOVA plot shows the effects of each factor scaled so that they can be compared to the variability of the residuals. For each factor, the deviations of the adjusted level means from the estimated grand mean are displayed. Any factor that shows considerably larger variability than the residuals is likely to be an important factor. Student-Newman-Keuls was used for the post hoc test. ANOVA, analysis of variance; AR, acrosome reaction; CAP, capacitating-HTF; Ca-ionophore, calcium ionophore; DOPA, dopamine; HD-C, HD capacitation medium; HM, high motile subpopulation; HTF, human tubal fluid; LM, low motile subpopulation; MYO, myo-inositol; PRG, progesterone; PRL, prolactin and SP, subpopulations.
